# Supplementary material for: Neuronal Detection Triggers Systemic Digestive Shutdown in Response to Adverse Food Sources
Source: eLife journal article supplement (doi:10.7554/elife.104028), 2025-01-27
Supplement: fig3-figsupp1-data1 [file Figure 3—Figure Supplement1.pdf › Figure 3—Figure Supplement 1-Source Data1/Figure 3—Figure Supplement1.pdf]

1000bp

odr-1p::Cas9+  
WT u6p::nsy-1-sg

Figure 3—Figure Supplement1
