# Supplementary material for: Neuronal detection triggers systemic digestive shutdown in response to adverse food sources in Caenorhabditis elegans
Source: eLife. 2025 Oct 3;14:RP104028. doi: 10.7554/eLife.104028 (PMC12494379; doi:10.7554/eLife.104028)
Supplement: Figure 1—figure supplement 1—source data 1. [file elife-104028-fig1-figsupp1-data1.xlsx]

## Sheet: Figure 1-figure supplement 1A
	Food choice: Number of worms (WT)														t` test(Time)	P-vaule	P value summary	Significantly different (P < 0.05)
	Time(h)	2h			4h			6h			8h				2h	0.0006	***	yes
		OP50	HK	Total	OP50	HK	Total	OP50	HK	Total	OP50	HK	Total		4h	0.0025	**	yes
	Rpt1	40	13	53	117	33	150	151	49	200	310	54	364		6h	0.0005	***	yes
	Rpt2	44	19	63	121	61	182	175	90	265	297	82	379		8h	<0.0001	****	yes
	Rpt3	19	10	29	70	38	108	126	57	183	215	65	280
	Total	103	42	145	308	132	440	452	196	648	822	201	1023
	Food choice: Percentage(%)
		OP50	HK		OP50	HK		OP50	HK		OP50	HK
	Rpt1	0.754717	0.245283		0.78	0.22		0.755	0.245		0.851648	0.148352
	Rpt2	0.698413	0.301587		0.664835	0.335165		0.660377	0.339623		0.783641	0.216359
	Rpt3	0.655172	0.344828		0.648148	0.351852		0.688525	0.311475		0.767857	0.232143
	Average	0.702767	0.297233		0.697661	0.302339		0.701301	0.298699		0.801049	0.198951

## Sheet: Figure 1-figure supplement 1B
	Food choice: Number of worms (WT)														t` test(Time)	P-vaule	P value summary	Significantly different (P < 0.05)
	Time(h)	2h			4h			6h			8h				2h	0.1659	ns	no
		HK	SS	Total	HK	SS	Total	HK	SS	Total	HK	SS	Total		4h	0.1681	ns	no
	Rpt1	53	63	116	62	71	133	56	75	131	73	63	136		6h	0.0005	***	yes
	Rpt2	98	115	213	89	158	247	114	165	279	114	141	255		8h	0.8564	ns	no
	Rpt3	136	128	264	181	172	353	169	212	381	140	137	277
	Total	287	306	593	332	401	733	339	452	791	327	341	668
	Food choice: Percentage(%)
		HK	SS		HK	SS		HK	SS		HK	SS
	Rpt1	0.456897	0.543103		0.466165	0.533835		0.427481	0.572519		0.536765	0.463235
	Rpt2	0.460094	0.539906		0.360324	0.639676		0.408602	0.591398		0.447059	0.552941
	Rpt3	0.515152	0.484848		0.512748	0.487252		0.44357	0.55643		0.505415	0.494585
	Average	0.477381	0.522619		0.446412	0.553588		0.426551	0.573449		0.496413	0.503587

## Sheet: Figure 1-figure supplement 1C
	Strains	Median lifespan (days)	Total Animals	Censored Animals	P-value
	repeat1
	SS	19	81		p=0.267(ns)
	NGM	19	155
	repeat2
	SS	20	140		p=0.1244(ns)
	NGM	21	169
	repeat3
	SS	19	91		p=0.0224(*)
	NGM	19	70

## Sheet: Figure 1-figure supplement 1D
Original worm length	0h	36h			60h			84h
		NGM	OP50	SS	NGM	OP50	SS	NGM	OP50	SS		t` test		P-vaule	P value summary	Significantly different (P < 0.05)
	n=61	n=43	n=61	n=45	n=51	n=42	n=48	n=60	n=51	n=42		36h	NGM vs OP50	<0.0001	****	yes
	60.93	103.703	234.49	138.119	195.847	422.597	385.11	264.388	378.644	444.011			NGM vs SS	<0.0001	****	yes
	71.201	112.608	271.889	198.559	221.605	424.979	408.95	273.846	448.636	468.404			OP50 vs SS	<0.0001	****	yes
	71.55	147.115	277.461	206.585	230.866	432.462	410.049	275.503	459.032	476.419		60h	NGM vs OP50	<0.0001	****	yes
	73.753	149.745	287.934	207.931	235.845	441.868	415.353	295.433	461.958	479.319			NGM vs SS	<0.0001	****	yes
	74.554	161.274	288.63	209.16	251.147	446.152	434.576	304.195	462.714	488.082			OP50 vs SS	<0.0001	****	yes
	74.641	161.733	293.082	214.914	251.38	449.599	439.864	307.157	470.498	490.02		84h	NGM vs OP50	<0.0001	****	yes
	75.348	166.862	300.846	216.885	256.179	469.786	442.115	314.973	474.568	492.613			NGM vs SS	<0.0001	****	yes
	76.796	167.982	302.091	225.163	259.775	477.531	443.952	321.226	484.246	495.938			OP50 vs SS	0.4783	ns	no
	78.079	171.856	308.841	229.367	261.568	482.245	446.715	325.128	488.809	498.131
	78.282	173.91	310.229	231.099	263.741	483.781	448.332	326.333	489.165	501.913
	80.828	175.189	310.812	232.326	264.707	495.482	448.69	333.11	490.599	516.248
	81.136	176.064	316.382	235.4	264.724	496.293	448.828	336.053	491.67	516.959
	81.702	177.438	317.716	236.202	265.206	497.799	452.057	337.463	493.572	529.674
	82.197	177.74	319.533	239.603	265.647	502.492	454.008	341.053	497.392	529.728
	82.288	178.134	320.106	241.624	272.499	506.316	456.242	341.085	500.034	533.775
	84.096	179.192	321.708	244.807	272.508	508.649	457.675	341.765	502.166	535.175
	84.735	181.193	322.812	248.024	273.557	514.198	457.785	342.196	502.269	535.64
	86.291	181.93	325.658	248.818	273.652	517.462	459.098	346.128	503.963	538.568
	89.159	184.509	326.295	250.091	274.083	517.623	459.979	346.155	512.713	539.311
	89.326	185.103	327.293	250.335	277.214	520.014	460.448	349.255	514.279	539.922
	89.794	185.128	329.627	251.256	277.601	522.298	460.785	359.794	516.638	543.863
	92.392	185.773	329.762	254.332	281.317	523.737	461.362	364.829	517.613	545.708
	92.446	185.824	330.903	255.213	281.443	524.747	463.652	364.929	521.367	546.338
	92.746	186.591	331.155	255.837	282.131	527.032	464.967	369.192	522.57	547.368
	95.777	189.156	333.271	258.018	282.991	536.586	468.015	372.267	523.608	552.028
	95.827	190.627	333.793	259.159	284.859	537.122	469.419	372.584	526.073	552.129
	96.931	191.608	333.81	260.808	285.755	537.838	470.508	373.654	527.634	552.309
	97.13	191.618	334.337	261.371	290.428	547.655	473.036	377.652	535.678	552.949
	97.791	192.065	335.363	261.721	290.915	550.163	475.524	379.681	537.638	554.692
	98.835	192.688	336.249	264.945	290.984	557.442	476.016	380.221	539.251	561.463
	99.718	192.705	337.293	265.514	291.471	561.794	476.207	382.042	540.069	563.244
	100.256	192.821	339.564	266.736	296.21	565.669	476.685	382.417	542.09	570.478
	100.982	193.072	340.981	274.56	297.13	576.093	477.164	383.146	542.181	571.21
	104.202	193.534	343.51	278.457	306.553	576.391	477.434	384.622	551.765	572.617
	104.452	193.954	350.255	281.585	306.705	588.313	477.749	386.132	557.743	574.733
	105.195	194.947	351.271	281.952	307.286	601.478	478.56	388.686	561.689	575.389
	106.589	195.827	352.402	282.207	308.124	605.599	481.749	390.007	567.002	576.749
	107.423	199.698	355.296	282.483	309.278	608.686	484.618	393.777	567.149	582.704
	107.697	201.696	357.175	289.152	311.916	622.093	485.118	394.434	568.627	586.191
	108.788	202.719	357.856	291.041	312.689	623.872	488.683	396.305	570.003	587.695
	109.872	207.005	357.95	293.589	313.085	638.208	491.516	396.692	570.62	592.679
	110.514	207.779	360.875	295.539	313.722	659.696	494.023	397.853	573.785	633.304
	110.645	254.32	364.046	295.837	318.92		501.349	400.091	574.811
	110.985		364.057	315.55	318.93		502.081	404.202	574.97
	111.054		364.98	317.587	320.95		509.217	404.655	587.839
	111.08		366.717		322.252		553.919	405.016	598.763
	111.626		367.122		325.635		560.411	405.565	621.807
	111.723		368.971		336.904		590.248	406.508	633.514
	111.747		369.385		343.644			410.508	634.736
	111.791		373.267		369.122			413.92	640.848
	111.967		376.935		439.304			414.929	658.976
	113.778		378.906					430.315
	113.856		379.391					431.864
	114.192		380.33					434.33
	114.653		388.667					443.107
	115.294		389.734					444.27
	115.977		392.489					460.969
	116.035		404.689					478.456
	116.387		408.636					481.339
	117.273		412.849					499.83
	117.346		417.639
	average:
	97.5354	182.196	342.382	253.321	289.216	528.568	469.163	376.387	532.039	539.183
