# Supplementary material for: Neuronal detection triggers systemic digestive shutdown in response to adverse food sources in Caenorhabditis elegans
Source: eLife. 2025 Oct 3;14:RP104028. doi: 10.7554/eLife.104028 (PMC12494379; doi:10.7554/eLife.104028)
Supplement: Figure 1—source data 1. [file elife-104028-fig1-data1.xlsx]

## Sheet: Figure 1C
		Food Aversion: Number of worms								t` test(Time)	P-vaule	P value summary	Significantly different (P < 0.05)
		Time(h)	0	2	4	6	8	Total number of rpt3(0h)		2h	0.0005	***	yes
	OP50	Rpt1	60	60	60	60	60	187		4h	0.0001	***	yes
		Rpt2	64	64	64	64	64			6h	0.0037	**	yes
		Rpt3	63	63	63	63	63			8h	0.0045	**	yes
	SS	Rpt1	32	22	16	16	15	159
		Rpt2	52	36	30	36	37
		Rpt3	53	41	32	36	32
		Food Aversion: Percentage(%)
		Time(h)	0	2	4	6	8
	OP50	Rpt1	0	0	0	0	0
		Rpt2	0	0	0	0	0
		Rpt3	0	0	0	0	0
	SS	Rpt1	0	0.3125	0.5	0.5	0.53125
		Rpt2	0	0.307692	0.423077	0.307692	0.288462
		Rpt3	0	0.226415	0.396226	0.320755	0.396226

## Sheet: Figure 1D
	Food choice: Number of worms (WT)														t` test(Time)	P-vaule	P value summary	Significantly different (P < 0.05)
	Time(h)	2h			4h			6h			8h				2h	0.007	**	yes
		OP50	SS	Total	OP50	SS	Total	OP50	SS	Total	OP50	SS	Total		4h	<0.0001	****	yes
	Rpt1	29	12	41	42	17	59	58	21	79	52	27	79		6h	<0.0001	****	yes
	Rpt2	15	10	25	18	7	25	24	12	36	32	9	41		8h	<0.0001	****	yes
	Rpt3	9	3	12	34	8	42	44	9	53	45	12	57
	Rpt4	16	10	26	33	18	51	46	17	63	49	15	64
	Rpt5	6	7	13	20	13	33	33	16	49	38	18	56
	Total	75	42	117	147	63	210	205	75	280	216	81	297
	Food choice: Percentage(%)
		OP50	SS		OP50	SS		OP50	SS		OP50	SS
	Rpt1	0.6	0.4		0.72	0.28		0.666667	0.333333		0.780488	0.219512
	Rpt2	0.75	0.25		0.809524	0.190476		0.830189	0.169811		0.789474	0.210526
	Rpt3	0.615385	0.384615		0.647059	0.352941		0.730159	0.269841		0.765625	0.234375
	Rpt4	0.461538	0.538462		0.606061	0.393939		0.673469	0.326531		0.678571	0.321429
	Rpt5	0.641026	0.358974		0.7	0.3		0.732143	0.267857		0.727273	0.272727
	Average	0.61359	0.38641		0.696529	0.303471		0.726525	0.273475		0.748286	0.251714

## Sheet: Figure 1F
		Strains	Median lifespan (days)	Total Animals	Censored Animals	P-value
		repeat1
		OP50	13	90	33(57/90)	p=0.0032(**)
		SS	6	90	21(69/90)
		repeat2
		OP50	13	150	77(73/150)	p<0.0001(****)
		SS	7	150	11(139/150)
		repeat3
		OP50	12	150	70(80/150)	p<0.0001(****)
		SS	9	150	14(136/150)
