# Supplementary material for: Neuronal detection triggers systemic digestive shutdown in response to adverse food sources in Caenorhabditis elegans
Source: eLife. 2025 Oct 3;14:RP104028. doi: 10.7554/eLife.104028 (PMC12494379; doi:10.7554/eLife.104028)
Supplement: Figure 2—source data 1. [file elife-104028-fig2-data1.xlsx]

## Sheet: Figure 2A
Original worm length	WT	nsy-1(ag3)		Relative worm length	WT	nsy-1(ag3)
	n=104	n=80			n=104	n=80		t` test	P value	P value summary	Significantly different (P < 0.05)
	59.161	81.205			0.685582	0.941037		WT vs nsy-1(ag3)	<0.0001	****	yes
	59.358	85.404			0.687865	0.989697
	63.203	86.775			0.732422	1.00558
	65.011	87.328			0.753374	1.01199
	66.438	89.867			0.769911	1.04142
	67.522	95.948			0.782473	1.11188
	69.214	97.467			0.80208	1.12949
	69.352	98.905			0.80368	1.14615
	69.752	100.583			0.808315	1.1656
	69.769	100.598			0.808512	1.16577
	71.59	101.171			0.829614	1.17241
	71.767	102.315			0.831666	1.18567
	72.064	103.681			0.835107	1.2015
	72.933	104.447			0.845178	1.21037
	73.146	105.528			0.847646	1.2229
	73.339	110.066			0.849883	1.27549
	73.729	111.296			0.854402	1.28974
	74.049	112.569			0.85811	1.3045
	74.212	114.245			0.859999	1.32392
	74.63	115.762			0.864843	1.3415
	74.794	116.034			0.866744	1.34465
	74.955	117.479			0.868609	1.3614
	75.236	117.665			0.871866	1.36355
	75.545	118.422			0.875447	1.37232
	75.706	119.674			0.877312	1.38683
	75.837	121.691			0.87883	1.41021
	75.895	122.296			0.879503	1.41722
	75.984	122.574			0.880534	1.42044
	76.922	122.579			0.891404	1.4205
	77.605	124.15			0.899319	1.4387
	78.538	124.954			0.910131	1.44802
	78.986	124.956			0.915322	1.44804
	79.237	126.491			0.918231	1.46583
	79.546	126.631			0.921812	1.46745
	80.544	128.75			0.933377	1.49201
	80.936	129.184			0.93792	1.49704
	81.139	130.171			0.940272	1.50848
	81.922	130.495			0.949346	1.51223
	81.966	130.909			0.949856	1.51703
	82.025	132.867			0.950539	1.53972
	82.498	134.186			0.956021	1.555
	83.048	134.233			0.962394	1.55555
	83.121	134.34			0.96324	1.55679
	83.834	136.294			0.971503	1.57943
	84.247	137.967			0.976289	1.59882
	84.666	139.646			0.981144	1.61828
	84.669	139.67			0.981179	1.61855
	84.728	139.836			0.981863	1.62048
	84.995	141.185			0.984957	1.63611
	85.53	142.549			0.991157	1.65192
	86.071	142.603			0.997426	1.65254
	86.491	142.629			1.00229	1.65284
	86.642	143.623			1.00404	1.66436
	86.723	144.444			1.00498	1.67388
	86.832	148.091			1.00624	1.71614
	87.008	149.097			1.00828	1.7278
	87.342	149.617			1.01216	1.73382
	88.332	153.098			1.02363	1.77416
	88.401	155.151			1.02443	1.79795
	88.468	161.782			1.0252	1.8748
	88.812	163.192			1.02919	1.89114
	88.87	165.389			1.02986	1.9166
	89.488	168.104			1.03702	1.94806
	89.497	184.686			1.03713	2.14022
	89.688	184.955			1.03934	2.14333
	90.166	186.645			1.04488	2.16292
	90.367	191.984			1.04721	2.22479
	90.407	192.961			1.04767	2.23611
	90.566	194.598			1.04952	2.25508
	91.025	196.606			1.05484	2.27835
	91.739	198.135			1.06311	2.29607
	91.838	204.28			1.06426	2.36728
	92.286	204.469			1.06945	2.36947
	92.467	209.259			1.07155	2.42498
	93.516	214.512			1.0837	2.48585
	93.653	239.907			1.08529	2.78014
	93.814	244.035			1.08716	2.82798
	94.294	244.812			1.09272	2.83698
	94.683	246.738			1.09723	2.8593
	96.069	264.372			1.11329	3.06365
	96.33				1.11631
	96.708				1.12069
	97.186				1.12623
	97.455				1.12935
	98.142				1.13731
	98.715				1.14395
	98.781				1.14471
	98.823				1.1452
	99.209				1.14967
	99.44				1.15235
	100.663				1.16652
	102.1				1.18318
	103.443				1.19874
	104.651				1.21274
	104.684				1.21312
	105.038				1.21722
	105.368				1.22105
	105.641				1.22421
	106.413				1.23316
	106.478				1.23391
	109.636				1.27051
	110.6				1.28168
	112.043				1.2984
	116.488				1.34991
	average:
	86.2931	143.285

## Sheet: Figure 2B
		Food Aversion: Number of worms								t` test(Time)	P-vaule	P value summary	Significantly different (P < 0.05)
		Time(h)	0	2	4	6	8	Total number of rpt3(0h)		2h	0.718426	ns	no
	WT SS	Rpt1	103	88	44	59	73	307		4h	0.0179	*	yes
		Rpt2	86	67	52	36	38			6h	0.00782689	**	yes
		Rpt3	118	89	70	62	66			8h	0.0535668	ns	no
	nsy-1(ag3) SS	Rpt1	71	55	56	56	57	275
		Rpt2	80	76	62	65	59
		Rpt3	51	38	47	49	44
		Food Aversion: Percentage(%)
		Time(h)	0	2	4	6	8
	WT SS	Rpt1	0	0.145631	0.572816	0.427184	0.291262
		Rpt2	0	0.22093	0.395349	0.581395	0.55814
		Rpt3	0	0.245763	0.40678	0.474576	0.440678
	nsy-1(ag3) SS	Rpt1	0	0.225352	0.211268	0.211268	0.197183
		Rpt2	0	0.05	0.225	0.1875	0.2625
		Rpt3	0	0.254902	0.0784314	0.0392157	0.137255

## Sheet: Figure 2C
		Food choice: Number of worms														t` test(Time, N2-SS vs nsy-1(ag3)-SS)	P-vaule	P value summary	Significantly different (P < 0.05)
		Time(h)	2h			4h			6h			8h				2h	0.2122	ns	no
			HK-OP50	SS	Total	HK-OP50	SS	Total	HK-OP50	SS	Total	HK-OP50	SS	Total		4h	<0.01	**	yes
	WT	Rpt1	53	63	116	62	71	133	56	75	131	73	63	136		6h	<0.001	***	yes
		Rpt2	98	115	213	89	158	247	114	165	279	114	141	255		8h	<0.01	**	yes
		Rpt3	136	128	264	181	172	353	169	212	381	140	137	277
	nsy-1(ag3)	Rpt1	74	145	219	108	235	343	109	231	340	121	239	360
		Rpt2	83	171	254	106	279	385	115	277	392	116	259	375
		Rpt3	132	131	263	122	175	297	133	244	377	137	200	337
		Food choice: Percentage(%)
			HK-OP50	SS		HK-OP50	SS		HK-OP50	SS		HK-OP50	SS
	WT	Rpt1	0.456897	0.543103		0.466165	0.533835		0.427481	0.572519		0.536765	0.463235
		Rpt2	0.460094	0.539906		0.360324	0.639676		0.408602	0.591398		0.447059	0.552941
		Rpt3	0.515152	0.484848		0.512748	0.487252		0.44357	0.55643		0.505415	0.494585
	nsy-1(ag3)	Rpt1	0.3379	0.6621		0.314869	0.685131		0.320588	0.679412		0.336111	0.663889
		Rpt2	0.326772	0.673228		0.275325	0.724675		0.293367	0.706633		0.309333	0.690667
		Rpt3	0.501901	0.498099		0.410774	0.589226		0.352785	0.647215		0.406528	0.593472

## Sheet: Figure 2D
		Strains	Median lifespan (days)	Total Animals	Censored Animals	P-value
		repeat1
		WT	8	90	33(57/90)	p<0.0001(****)
		nsy-1(ag3)	3	90	39(51/90)
		repeat2
		WT	6	90	31(59/90)	p=0.0002(***)
		nsy-1(ag3)	3	90	32(58/90)
		repeat3
		WT	9	90	18(72/90)	p<0.0001(****)
		nsy-1(ag3)	3	90	46(44/90)
