# Supplementary material for: Neuronal detection triggers systemic digestive shutdown in response to adverse food sources in Caenorhabditis elegans
Source: eLife. 2025 Oct 3;14:RP104028. doi: 10.7554/eLife.104028 (PMC12494379; doi:10.7554/eLife.104028)
Supplement: Figure 3—figure supplement 2—source data 1. [file elife-104028-fig3-figsupp2-data1.xlsx]

## Sheet: Figure 3-figure supplement 2B
Original worm length	Control	Transgene		Relative worm length	Control	Transgene
	n=40	n=23			n=40	n=23		t` test	P value	P value summary	Significantly different (P < 0.05)
	116.627	59.241			0.483075	0.245379		Transgene vs Control	<0.0001	****	yes
	148.674	64.054			0.615815	0.265315
	149.816	80.86			0.620545	0.334926
	157.165	86.921			0.650985	0.360031
	164.514	89.622			0.681425	0.371219
	176.405	90.888			0.730678	0.376463
	183.04	92.545			0.758161	0.383326
	187.017	103.149			0.774634	0.427248
	204.003	107.696			0.844991	0.446082
	210.198	116.543			0.870651	0.482727
	220.236	118.621			0.912229	0.491334
	224.083	124.16			0.928163	0.514277
	228.854	129.254			0.947925	0.535377
	238.774	140.452			0.989014	0.581759
	240.47	151.593			0.996039	0.627906
	242.897	176.592			1.00609	0.731453
	246.701	180.886			1.02185	0.749239
	249.519	185.825			1.03352	0.769697
	258.113	186.746			1.06912	0.773511
	261.318	200.745			1.08239	0.831496
	262.118	206.35			1.08571	0.854712
	262.292	212.288			1.08643	0.879308
	264.128	238.946			1.09403	0.989726
	265.285				1.09882
	266.914				1.10557
	269.467				1.11615
	271.066				1.12277
	274.262				1.13601
	274.649				1.13761
	277.038				1.14751
	278.634				1.15412
	279.288				1.15682
	282.581				1.17046
	283.641				1.17486
	287.568				1.19112
	287.725				1.19177
	287.878				1.19241
	288.586				1.19534
	288.604				1.19541
	296.905				1.2298
	average:
	241.426	136.695
