# Supplementary material for: Neuronal detection triggers systemic digestive shutdown in response to adverse food sources in Caenorhabditis elegans
Source: eLife. 2025 Oct 3;14:RP104028. doi: 10.7554/eLife.104028 (PMC12494379; doi:10.7554/eLife.104028)
Supplement: Figure 3—figure supplement 3—source data 1. [file elife-104028-fig3-figsupp3-data1.xlsx]

## Sheet: Figure 3—figure supplement 3A
	Food Aversion: Number of worms												t` test(Time)	P-vaule	P value summary	Significantly different (P < 0.05)
		Time(h)	2		4		6		8				2h	0.0125308	*	yes
			0utside the lawn	total	0utside the lawn	total	0utside the lawn	total	0utside the lawn	total			4h	0.537461	ns	no
	WT SS	Rpt1	10	318	76	241	73	199	92	298			6h	0.0187793	*	yes
		Rpt2	5	210	113	318	123	294	143	299			8h	0.154761	ns	no
		Rpt3	7	262	55	201	83	266	59	256
	AWC nsy-1 KO SS	Rpt1	16	146	38	155	44	168	38	192
		Rpt2	12	183	62	178	48	228	54	240
		Rpt3	25	213	64	235	31	171	31	149
	Food Aversion: Percentage(%)
		Time(h)	2	4	6	8
	WT SS	Rpt1	0.0314465	0.315353	0.366834	0.308725
		Rpt2	0.0238095	0.355346	0.418367	0.478261
		Rpt3	0.0267176	0.273632	0.31203	0.230469
	AWC nsy-1 KO SS	Rpt1	0.109589	0.245161	0.261905	0.197917
		Rpt2	0.0655738	0.348315	0.210526	0.225
		Rpt3	0.117371	0.27234	0.181287	0.208054

## Sheet: Figure 3—figure supplement 3B
	Food Aversion: Number of worms												t` test(Time)	P-vaule	P value summary	Significantly different (P < 0.05)
		Time(h)	2		4		6		8				2h	0.00182679	**	yes
			0utside the lawn	total	0utside the lawn	total	0utside the lawn	total	0utside the lawn	total			4h	0.0215595	*	yes
	nsy-1(ag3) SS	Rpt1	28	440	51	462	55	433	50	417			6h	0.0103344	*	yes
		Rpt2	76	619	130	623	111	608	107	602			8h	0.081323	ns	no
		Rpt3	62	534	89	521	93	522	100	512
	nsy-1(ag3);Podr-1::nsy-1::gfp SS	Rpt1	122	489	130	495	130	488	89	462
		Rpt2	197	690	202	672	203	698	204	669
		Rpt3	152	504	139	520	126	521	140	499
	Food Aversion: Percentage(%)
		Time(h)	2	4	6	8
	nsy-1(ag3) SS	Rpt1	0.0636364	0.11039	0.127021	0.119904
		Rpt2	0.122779	0.208668	0.182566	0.177741
		Rpt3	0.116105	0.170825	0.178161	0.195312
	nsy-1(ag3);Podr-1::nsy-1::gfp SS	Rpt1	0.249489	0.262626	0.266393	0.192641
		Rpt2	0.285507	0.300595	0.290831	0.304933
		Rpt3	0.301587	0.267308	0.241843	0.280561

## Sheet: Figure 3—figure supplement 3C
	Food choice: Number of worms (AWC nsy-1 KO)														t` test(Time)	P-vaule	P value summary	Significantly different (P < 0.05)
	Time(h)	2h			4h			6h			8h				2h	0.00205372	**	yes
		SS	HK	Total	SS	HK	Total	SS	HK	Total	SS	HK	Total		4h	0.00054115	***	yes
	Rpt1	122	59	181	216	84	300	498	105	603	468	150	618		6h	<0.0001	****	yes
	Rpt2	192	38	230	401	79	480	501	111	612	695	87	782		8h	0.000348207	***	yes
	Rpt3	176	30	206	463	77	540	326	75	401	416	108	524
	Total	490	127	617	1080	240	1320	1325	291	1616	1579	345	1924
	Food choice: Percentage(%)
		SS	HK		SS	HK		SS	HK		SS	HK
	Rpt1	0.674033	0.325967		0.72	0.28		0.825871	0.174129		0.757282	0.242718
	Rpt2	0.834783	0.165217		0.835417	0.164583		0.818627	0.181373		0.888747	0.111253
	Rpt3	0.854369	0.145631		0.857407	0.142593		0.812968	0.187032		0.793893	0.206107
	Average	0.787728	0.212272		0.804275	0.195725		0.819155	0.180845		0.813307	0.186693

## Sheet: Figure 3—figure supplement 3D
	Food choice: Number of worms [nsy-1(ag3);Podr-1::nsy-1::gfp)]														t` test(Time)	P-vaule	P value summary	Significantly different (P < 0.05)
	Time(h)	2h			4h			6h			8h				2h	0.0471843	*	yes
		SS	HK	Total	SS	HK	Total	SS	HK	Total	SS	HK	Total		4h	0.0602394	ns	no
	Rpt1	11	12	23	41	42	83	95	79	174	192	151	343		6h	0.360262	ns	no
	Rpt2	8	12	20	57	36	93	124	148	272	214	192	406		8h	0.00949825	**	yes
	Rpt3	2	5	7	79	52	131	166	121	287	160	112	272
	Total	21	29	50	177	130	307	385	348	733	566	455	1021
	Food choice: Percentage(%)
		SS	HK		SS	HK		SS	HK		SS	HK
	Rpt1	0.478261	0.521739		0.493976	0.506024		0.545977	0.454023		0.559767	0.440233
	Rpt2	0.4	0.6		0.612903	0.387097		0.455882	0.544118		0.527094	0.472906
	Rpt3	0.285714	0.714286		0.603053	0.396947		0.578397	0.421603		0.588235	0.411765
	Average	0.387992	0.612008		0.569978	0.430022		0.526752	0.473248		0.558365	0.441635
