# Supplementary material for: Neuronal detection triggers systemic digestive shutdown in response to adverse food sources in Caenorhabditis elegans
Source: eLife. 2025 Oct 3;14:RP104028. doi: 10.7554/eLife.104028 (PMC12494379; doi:10.7554/eLife.104028)
Supplement: Figure 3—figure supplement 4—source data 1. [file elife-104028-fig3-figsupp4-data1.xlsx]

## Sheet: Sheet1
Original worm length	WT	AWC(-)		Relative worm length	WT	AWC(-)
	n=35	n=26			n=35	n=26		t` test	P value	P value summary	Significantly different (P < 0.05)
	1.061	1.121			0.895488	0.946128		AWC(-) vs. WT	0.0585	ns	no
	1.213	1.164			1.02378	0.982421
	1.12	1.161			0.945284	0.979889
	1.159	1.21			0.978201	1.02124
	1.234	1.017			1.0415	0.858352
	1.14	1.075			0.962165	0.907304
	1.13	1.261			0.953724	1.06429
	1.191	1.131			1.00521	0.954568
	1.144	1.081			0.965541	0.912368
	1.206	1.026			1.01787	0.865948
	1.14	1.079			0.962165	0.91068
	1.169	1.197			0.986641	1.01027
	1.081	1.146			0.912368	0.967229
	1.258	1.164			1.06176	0.982421
	1.218	1.263			1.028	1.06598
	1.264	1.072			1.06682	0.904772
	1.11	1.148			0.936844	0.968917
	1.226	1.348			1.03475	1.13772
	1.196	1.195			1.00943	1.00858
	1.22	1.134			1.02968	0.9571
	1.262	1.155			1.06513	0.974825
	1.166	1.165			0.984109	0.983265
	1.188	1.185			1.00268	1.00014
	1.109	1.215			0.936	1.02546
	1.186	1.104			1.00099	0.93178
	1.287	1.078			1.08623	0.909836
	1.306				1.10227
	1.096				0.925028
	1.174				0.990861
	1.163				0.981577
	1.2				1.0128
	1.155				0.974825
	1.185				1.00014
	1.371				1.15713
	1.141				0.963009
	average:
	1.18483	1.14981
