# Supplementary material for: Neuronal detection triggers systemic digestive shutdown in response to adverse food sources in Caenorhabditis elegans
Source: eLife. 2025 Oct 3;14:RP104028. doi: 10.7554/eLife.104028 (PMC12494379; doi:10.7554/eLife.104028)
Supplement: Figure 3—source data 1. [file elife-104028-fig3-data1.xlsx]

## Sheet: Figure 3B
Original worm length	Control	Transgene		Relative worm length	Control	Transgene
	n=147	n=60			n=147	n=60		t` test	P value	P value summary	Significantly different (P < 0.05)
	80	71.4			0.513285	0.384964		Control vs Transgene	<0.0001	****	yes
	87.9	78.8			0.6842	0.424862
	91.3	80.7			0.722481	0.435106
	93.2	86.4			0.76184	0.465838
	99.2	94.4			0.808747	0.508971
	104.5	98.2			0.87776	0.52946
	110.9	104.8			0.878299	0.565045
	111.4	108.8			0.934911	0.586611
	112	110.7			0.941921	0.596855
	113.9	115.7			0.997994	0.623813
	115.1	122.5			1.01147	0.660477
	116.3	138.8			1.06215	0.74836
	116.6	149.6			1.07887	0.80659
	116.7	154.9			1.07887	0.835166
	119.4	167.8			1.0848	0.904718
	124.1	176.1			1.08534	0.949469
	125.5	182			1.34629	0.98128
	126.6	78.9			1.41099	0.425401
	130.6	79.4			1.43364	0.428097
	136.8	96.9			1.67249	0.522451
	137.3	99.1			0.596316	0.534312
	138.7	104.4			0.607099	0.562888
	139.8	105.2			0.628127	0.567201
	140.3	106.6			0.680965	0.574749
	142.4	122.2			0.885308	0.658859
	144.1	125.8			0.92305	0.678269
	146.3	133.2			0.946773	0.718167
	147.2	134.1			1.07348	0.72302
	149.1	148.4			1.08965	0.80012
	150.2	169.4			1.10259	0.913345
	151.7	52.5			1.1069	0.283061
	151.8	67.7			1.11823	0.365014
	154.8	68.7			1.21042	0.370406
	155.9	70.8			1.21851	0.381729
	156.2	76.6			1.35007	0.413
	156.6	77.5			1.5005	0.417853
	157.8	85.4			1.51883	0.460447
	162.7	86.3			1.58784	0.465299
	162.9	99.3			0.389277	0.53539
	163.2	104.9			0.525686	0.565584
	163.7	112			0.679887	0.603864
	164.3	115			0.682582	0.620039
	166.4	116.3			0.706845	0.627048
	166.5	199.7			0.759144	1.07671
	167.4	226			0.78071	1.21851
	171.7	67.6			0.793111	0.364475
	173.9	81.4			0.839479	0.43888
	174.9	81.6			0.937607	0.439958
	177.6	85.4			0.941921	0.460447
	180.3	89.9			0.957017	0.484709
	181.7	92			0.981819	0.496031
	183.5	95.8			0.983975	0.51652
	185.4	97.4			0.993141	0.525146
	187.3	107.4			1.0848	0.579063
	201.9	115.5			1.11337	0.622735
	204.3	121.1			1.18293	0.652928
	206	137.9			1.20342	0.743508
	206.7	150.4			1.30963	0.810904
	208.1	170.6			1.37433	0.919815
	208.7	261			1.39266	1.40722
	210				1.4358
	210.9				1.66818
	213.7				1.68219
	213.9				2.08872
	216				2.09951
	216.2				0.431332
	218.4				0.473926
	226.3				0.492257
	239.6				0.502501
	248.5				0.534851
	249.8				0.563427
	250.6				0.597934
	251.4				0.600629
	257.4				0.603864
	264				0.614109
	267.6				0.620578
	275.1				0.627048
	288.4				0.628666
	288.4				0.629205
	293				0.643763
	305.5				0.669103
	318.8				0.676652
	95.2				0.682582
	126.9				0.704149
	134				0.737577
	141.3				0.740273
	150				0.747821
	162.8				0.753752
	162.9				0.756448
	173.4				0.76777
	174.7				0.776936
	185.1				0.788798
	187.6				0.79365
	197				0.803894
	200.1				0.809825
	200.1				0.817913
	201.2				0.818452
	201.3				0.834627
	249.7				0.840558
	261.7				0.842175
	265.9				0.844332
	310.2				0.850802
	110.6				0.877221
	112.6				0.878299
	116.5				0.879917
	126.3				0.882612
	164.2				0.885847
	171.2				0.89717
	175.6				0.897709
	199.1				0.902562
	202.1				0.925746
	204.5				0.937607
	205.3				0.942999
	207.4				0.957556
	224.5				0.972114
	226				0.979662
	250.4				0.989367
	278.3				0.999611
	281.7				1.00986
	294.5				1.08857
	72.2				1.10151
	97.5				1.11068
	126.1				1.11445
	126.6				1.122
	131.1				1.12524
	140.8				1.13225
	144.8				1.1371
	147.1				1.15219
	155.7				1.15327
	173.9				1.1646
	174.7				1.16567
	177.5				1.17754
	182.1				1.22013
	182.5				1.29184
	184.2				1.33982
	201.2				1.34683
	206.5				1.35115
	219.4				1.35546
	223.2				1.38781
	242.9				1.42339
	254.9				1.4428
	258.3				1.48324
	266.3				1.55495
	309.4				1.55495
	312				1.57975
	387.4				1.64715
	389.4				1.71886
	average:
	185.472	114.315

## Sheet: Figure 3C
Original worm length	WT	AWC nsy-1 KO		Relative worm length	WT	AWC nsy-1 KO
	n=51	n=33			n=51	n=33			t` test	P value	P value summary	Significantly different (P < 0.05)
	1.038	1.051			0.920661	0.932191			AWC nsy-1 KO vs WT	<0.0001	****	Yes
	1.295	1.153			1.14861	1.02266
	1.113	1.063			0.987183	0.942835
	1.145	1.644			1.01557	1.45816
	1.219	1.178			1.0812	1.04483
	1.17	1.58			1.03774	1.40139
	1.332	1.252			1.18143	1.11047
	1.26	2.549			1.11757	2.26085
	1.213	1.212			1.07588	1.07499
	1.093	2.242			0.969443	1.98856
	1.165	0.901			1.0333	0.799148
	1.093	2.791			0.969443	2.4755
	1.097	0.804			0.972991	0.713113
	1.079	0.921			0.957026	0.816887
	0.964	2.38			0.855026	2.11096
	1	1.32			0.886957	1.17078
	1.082	1.556			0.959687	1.3801
	0.917	1.138			0.813339	1.00936
	1.167	1.171			1.03508	1.03863
	1.245	1.9			1.10426	1.68522
	1.321	1.058			1.17167	0.9384
	0.956	1.948			0.84793	1.72779
	1.431	1.378			1.26923	1.22223
	1.31	2.369			1.16191	2.1012
	0.918	1.197			0.814226	1.06169
	0.909	1.956			0.806243	1.73489
	1.166	0.946			1.03419	0.839061
	1.235	1.056			1.09539	0.936626
	1.224	1.852			1.08563	1.64264
	1.024	1.32			0.908243	1.17078
	1.578	1.537			1.39962	1.36325
	1.033	2.168			0.916226	1.92292
	0.909	1.533			0.806243	1.3597
	0.998				0.885183
	1.177				1.04395
	1.101				0.976539
	1.161				1.02976
	1.067				0.946383
	1.183				1.04927
	1.094				0.97033
	1.266				1.12289
	1.036				0.918887
	1.149				1.01911
	1.139				1.01024
	1.238				1.09805
	0.87				0.771652
	1.26				1.11757
	1.063				0.942835
	1.016				0.901148
	0.989				0.8772
	0.992				0.879861
	average:
	1.12745	1.51891

## Sheet: Figure 3D-F
		The worm number of different AWC status
			2AWC ON	1AWC ON/1AWC OFF	2AWC OFF	Total	Totol number of Rpts 3		t` test (percent of 1AWC ON/1AWC OFF)	P value	P value summary	Significantly different (P < 0.05)
	WT-OP50	Rpt1	0	21	0	21	65		WT-SS vs WT-OP50	0.00177341	**	yes
		Rpt2	0	11	0	11			nsy-1(ag3)-SS vs nsy-1(ag3)-OP50	0.654833	ns	no
		Rpt3	0	29	4	33
	WT-SS	Rpt1	0	10	18	28	122
		Rpt2	0	11	14	25
		Rpt3	0	11	9	20			t` test (percent of 2AWC-OFF)	P value	P value summary	Significantly different (P < 0.05)
	nsy-1(ky397)-OP50	Rpt1	5	23	4	32	86		WT-SS vs WT-OP50	0.0018	**	yes
		Rpt2	23	9	0	32			nsy-1(ag3)-SS vs nsy-1(ag3)-OP50	0.9833	ns	no
		Rpt3	20	2	0	22
	nsy-1(ky397)-SS	Rpt1	11	16	4	31	89
		Rpt2	28	3	0	31
		Rpt3	23	4	0	27
		The worm number of different AWC status
			2AWC ON	1AWC ON/1AWC OFF	2AWC OFF	Total
	WT-OP50	Rpt1	0	1	0	1
		Rpt2	0	1	0	1
		Rpt3	0	0.878788	0.121212	1
	WT-SS	Rpt1	0	0.357143	0.642857	1
		Rpt2	0	0.44	0.56	1
		Rpt3	0	0.55	0.45	1
	nsy-1(ky397)-OP50	Rpt1	0.15625	0.71875	0.125	1
		Rpt2	0.71875	0.28125	0	1
		Rpt3	0.909091	0.0909091	0	1
	nsy-1(ky397)-SS	Rpt1	0.354839	0.516129	0.129032	1
		Rpt2	0.903226	0.0967742	0	1
		Rpt3	0.851852	0.148148	0	1

## Sheet: Figure 3G
Original worm length	WT	nsy-1(ag3)	tir-1(qd4)		Relative worm length	WT	nsy-1(ag3)	tir-1(qd4)
	n=77	n=90	n=90			n=77	n=90	n=90		t` test	P value	P value summary	Significantly different (P < 0.05)
	68.541	87.646	238.511			0.683301	0.873763	2.37777		WT vs nsy-1(ag3)	<0.0001	****	yes
	69.415	93.91	270.013			0.692014	0.93621	2.69182		WT vs tir-1(qd4)	<0.0001	****	yes
	72.371	95.655	187.094			0.721483	0.953606	1.86518
	78.526	96.448	139.705			0.782843	0.961512	1.39275
	83.511	97.723	98.451			0.83254	0.974222	0.98148
	83.58	98.813	209.393			0.833228	0.985089	2.08749
	83.71	101.373	169.043			0.834524	1.01061	1.68523
	83.783	102.542	251.87			0.835251	1.02226	2.51095
	83.882	102.717	212.006			0.836238	1.02401	2.11354
	84.686	103.661	93.389			0.844254	1.03342	0.931016
	87.43	103.878	163.633			0.871609	1.03558	1.63129
	89.099	106.058	177.263			0.888248	1.05732	1.76717
	89.877	106.818	207.111			0.896004	1.06489	2.06474
	90.18	106.882	215.004			0.899025	1.06553	2.14342
	90.224	107.057	200.998			0.899463	1.06728	2.00379
	91.223	107.442	114.132			0.909422	1.07111	1.13781
	91.44	110.766	110.637			0.911586	1.10425	1.10296
	92.251	111.493	162.118			0.919671	1.1115	1.61619
	92.506	113.272	182.258			0.922213	1.12923	1.81697
	92.715	113.373	229.117			0.924297	1.13024	2.28412
	92.732	113.802	152.948			0.924466	1.13452	1.52477
	92.888	113.802	220.664			0.926021	1.13452	2.19985
	94.319	114.787	140.447			0.940287	1.14434	1.40015
	95.291	115.673	194.156			0.949977	1.15317	1.93558
	95.888	116.464	183.694			0.955929	1.16106	1.83129
	96.244	116.746	147.334			0.959478	1.16387	1.46881
	96.874	117.884	159.385			0.965759	1.17521	1.58894
	97.191	118.311	242.051			0.968919	1.17947	2.41306
	97.721	119.302	191.259			0.974203	1.18935	1.9067
	99.004	119.745	177.785			0.986993	1.19376	1.77238
	99.067	120.049	153.167			0.987621	1.1968	1.52696
	99.551	120.391	168.024			0.992446	1.2002	1.67507
	99.67	120.397	192.771			0.993633	1.20026	1.92178
	99.785	121.884	136.753			0.994779	1.21509	1.36332
	100.038	122.752	119.662			0.997301	1.22374	1.19294
	100.068	122.757	204.02			0.9976	1.22379	2.03392
	100.315	123.11	151.273			1.00006	1.22731	1.50807
	100.351	123.325	128.094			1.00042	1.22945	1.277
	100.416	125.381	111.994			1.00107	1.24995	1.11649
	101.109	125.951	122.421			1.00798	1.25563	1.22044
	101.156	126.483	167.616			1.00845	1.26094	1.671
	101.608	128.545	144.86			1.01295	1.28149	1.44414
	101.694	128.749	119.363			1.01381	1.28353	1.18996
	101.951	129.353	142.502			1.01637	1.28955	1.42063
	102.154	129.471	88.148			1.0184	1.29073	0.878767
	102.538	130.423	104.203			1.02222	1.30022	1.03882
	102.768	130.485	139.698			1.02452	1.30083	1.39268
	103.186	131.238	199.828			1.02868	1.30834	1.99213
	103.237	131.252	130.183			1.02919	1.30848	1.29782
	103.767	132.635	137.901			1.03448	1.32227	1.37477
	104.266	133.172	117.422			1.03945	1.32762	1.17061
	104.282	133.251	129.133			1.03961	1.32841	1.28736
	104.381	134.748	93.998			1.0406	1.34333	0.937087
	104.749	134.912	194.098			1.04427	1.34497	1.93501
	107.318	136.29	113.251			1.06988	1.35871	1.12902
	107.451	136.557	128.905			1.0712	1.36137	1.28508
	107.525	138.352	211.157			1.07194	1.37926	2.10507
	107.684	138.448	134.958			1.07353	1.38022	1.34543
	108.211	140.739	102.237			1.07878	1.40306	1.01922
	110.655	140.807	124.979			1.10314	1.40374	1.24594
	110.688	141.256	149.52			1.10347	1.40821	1.4906
	110.832	141.516	110.921			1.10491	1.4108	1.1058
	110.861	141.994	126.704			1.1052	1.41557	1.26314
	110.95	142.568	285.041			1.10609	1.42129	2.84164
	111.153	145.028	203.073			1.10811	1.44582	2.02448
	114.09	146.594	211.575			1.13739	1.46143	2.10924
	115.17	150.053	122.378			1.14816	1.49591	1.22001
	115.549	153.218	226.347			1.15193	1.52746	2.2565
	117.266	154.308	227.192			1.16905	1.53833	2.26493
	117.538	154.85	219.298			1.17176	1.54373	2.18623
	118.009	154.95	237.048			1.17646	1.54473	2.36318
	118.865	157.714	155.383			1.18499	1.57229	1.54905
	119.892	158.328	182.978			1.19523	1.57841	1.82415
	120.342	159.625	122.877			1.19972	1.59134	1.22499
	120.429	162.769	175.632			1.20058	1.62268	1.75091
	121.595	163.999	277.462			1.21221	1.63494	2.76608
	122.489	168.918	113.044			1.22112	1.68398	1.12696
		171.522	308.296				1.70994	3.07347
		173.092	249.613				1.72559	2.48845
		173.731	156.415				1.73196	1.55934
		175.675	257.516				1.75134	2.56723
		180.719	127.399				1.80163	1.27007
		181.952	190.725				1.81392	1.90138
		182.004	124.655				1.81444	1.24271
		192.039	193.487				1.91448	1.92892
		204.712	183.813				2.04082	1.83247
		212.201	227.976				2.11548	2.27274
		216.033	136.153				2.15368	1.35734
		232.692	120.338				2.31976	1.19968
		235.368	142.783				2.34644	1.42344
	average:
	100.309	136.171	169.108
