# Supplementary material for: Neuronal detection triggers systemic digestive shutdown in response to adverse food sources in Caenorhabditis elegans
Source: eLife. 2025 Oct 3;14:RP104028. doi: 10.7554/eLife.104028 (PMC12494379; doi:10.7554/eLife.104028)
Supplement: Figure 4—figure supplement 1—source data 1. [file elife-104028-fig4-figsupp1-data1.xlsx]

## Sheet: Figure 4—figure supplement 1A1
304 genes rely on nsy-1 to resist SS
name	Public Name	WTss1	WTss2	WTss3	meanbase	WTop501	WTop502	WTop503	meanbase	FoldChange	Log2FC	P-value
WBGene00000024	abu-1	0.8564	0.802943	1.30506	0.988133	0.0339076	0	0	0.0113025	87.4257	6.44999	0.00361019
WBGene00000031	abu-8	60.3414	54.8171	60.9883	58.7156	1.88557	0.423457	1.81411	1.37438	42.7215	5.41689	9.07773e-06
WBGene00000033	abu-10	14.6737	11.6656	16.0641	14.1344	0.862097	0.269367	1.00012	0.710527	19.8929	4.31418	0.00052233
WBGene00000034	abu-11	14.3069	12.6178	15.6885	14.2044	0.224541	0.153682	0.499273	0.292499	48.5623	5.60176	9.96174e-05
WBGene00000372	cyp-13A7	5.73937	4.47673	3.82383	4.67998	0.558743	0.362291	0.482867	0.467967	10.0006	3.32202	0.00173138
WBGene00000412	cdr-1	9.48163	8.12057	8.95794	8.85338	3.02158	2.79186	3.10087	2.97144	2.9795	1.57507	0.000133331
WBGene00000503	cht-1	16.0514	14.608	15.5882	15.4159	0.863639	0.838719	0.814439	0.838933	18.3756	4.19972	4.34052e-06
WBGene00000558	cnc-4	38.2221	32.7264	34.0632	35.0039	9.52804	10.0067	13.8242	11.1196	3.14793	1.65441	0.000367803
WBGene00000560	cnc-6	7.21834	3.54502	7.29517	6.01951	0.725486	0.620676	1.24087	0.862344	6.9804	2.80331	0.0146304
WBGene00000610	col-33	0.497208	0.48837	0.800918	0.595499	0	0.0494033	0.197537	0.0823133	7.23454	2.8549	0.0123972
WBGene00000628	col-51	0.301694	0.211666	0.234311	0.249224	0.0375415	0	0.0385266	0.0253561	9.82896	3.29704	0.001694
WBGene00000631	col-54	0.642758	0.573939	0.529453	0.58205	0.0508977	0	0.104466	0.051788	11.2391	3.49045	0.000288531
WBGene00000641	col-65	23.2758	24.3486	24.3528	23.9924	2.09108	0.840045	3.03232	1.98781	12.0697	3.59332	7.17856e-06
WBGene00000678	col-104	7.66056	8.57432	6.61834	7.61774	0.724173	0.159314	0.849343	0.57761	13.1884	3.7212	0.000308906
WBGene00000689	col-115	2.31928	2.1538	2.90387	2.45898	0.514235	0.678772	0.904678	0.699228	3.51671	1.81423	0.00228214
WBGene00000714	col-141	3.62455	3.98522	4.95078	4.18685	0.706828	0.822412	0.822092	0.783777	5.34189	2.41735	0.00102476
WBGene00000986	dhs-23	32.2432	29.4995	29.6249	30.4559	2.49357	2.55999	3.99563	3.01639	10.0968	3.33582	1.13433e-05
WBGene00001223	ehn-3	0.485234	0.408523	0.565287	0.486348	0.120761	0.123978	0.12393	0.12289	3.9576	1.98463	0.00130599
WBGene00001438	fkh-6	1.73216	2.21178	1.60873	1.85089	0.15088	0.116174	0.116129	0.127728	14.4909	3.85708	0.000728564
WBGene00001528	gcy-1	0.432544	0.535004	0.319347	0.428965	0.0837262	0.0429783	0.114564	0.0804229	5.33387	2.41518	0.0060467
WBGene00001530	gcy-3	4.23418	5.36736	4.57492	4.72549	2.53302	2.27186	1.92819	2.24436	2.1055	1.07416	0.00280392
WBGene00001695	grd-6	0.999924	0.803579	1.09821	0.967238	0.0263935	0.0541931	0.108344	0.0629769	15.3586	3.94098	0.000549197
WBGene00001703	grd-14	2.11899	2.75635	3.37298	2.74944	0.19954	0.153642	0.25597	0.203051	13.5407	3.75923	0.00217972
WBGene00001710	grl-1	2.56516	2.2946	2.15825	2.33934	0.359097	0.245775	0.163787	0.25622	9.1302	3.19065	9.50564e-05
WBGene00001722	grl-13	0.888283	0.872494	1.03483	0.931869	0.221068	0.340436	0.567173	0.376226	2.47689	1.30853	0.0081708
WBGene00001725	grl-16	5.9392	5.48105	5.23363	5.55129	0.2274	0.0875465	0.845954	0.386967	14.3457	3.84254	7.75051e-05
WBGene00001734	grl-25	0.0771408	0.0568273	0.087371	0.0737797	0.0335968	0.0344918	0	0.0226962	3.25075	1.70077	0.0242299
WBGene00001781	gst-33	119.509	112.62	111.598	114.576	7.04193	5.90935	8.67206	7.20778	15.8961	3.9906	2.08778e-06
WBGene00003058	lov-1	0.0499478	0.0272556	0.0452574	0.0408202	0.00483412	0.00992578	0.0148829	0.00988093	4.13121	2.04657	0.0145496
WBGene00003879	ora-1	4.76165	4.15735	4.61412	4.51104	1.38255	0.94625	1.24147	1.19009	3.7905	1.92239	0.000117854
WBGene00003999	pgp-5	10.4405	11.3605	10.6075	10.8028	4.10586	2.98212	3.92431	3.67076	2.94294	1.55726	9.16189e-05
WBGene00004000	pgp-6	4.48125	5.02472	4.9777	4.82789	0.540832	0.567309	0.615352	0.574498	8.40367	3.07102	1.70835e-05
WBGene00004001	pgp-7	0.317311	0.354171	0.274444	0.315309	0.100507	0.0515921	0.206288	0.119462	2.6394	1.40021	0.0186181
WBGene00004006	pgp-12	5.25147	6.62814	5.3516	5.74374	2.31625	2.07921	2.07841	2.15796	2.66166	1.41232	0.00134573
WBGene00004099	abu-15	1.14864	0.781077	1.40104	1.11025	0.0769632	0.0395067	0.118474	0.0783147	14.1768	3.82546	0.00471866
WBGene00004118	pqn-29	1.15108	0.678373	1.04299	0.957481	0.229177	0.0588206	0.205792	0.164597	5.81714	2.54031	0.00653726
WBGene00004146	pqn-63	1.19971	1.66361	1.50269	1.45534	0.0307356	0.0315544	0	0.0207633	70.0917	6.13117	0.000461993
WBGene00004153	pqn-71	35.9714	31.5447	38.202	35.2394	1.50257	0.635186	1.90482	1.34752	26.1512	4.70881	6.9965e-05
WBGene00004174	abu-14	24.5967	19.4608	24.8125	22.9567	1.11554	0.505261	1.11114	0.910649	25.2091	4.65588	0.000234087
WBGene00004231	ptr-17	1.30349	1.15755	1.56938	1.34347	0.342176	0.351291	0.478847	0.390771	3.438	1.78157	0.00175958
WBGene00004240	puf-4	0.658483	0.608733	0.45626	0.574492	0.101219	0.138553	0.138499	0.12609	4.55619	2.18783	0.00195028
WBGene00004996	spp-11	4.15277	2.86395	3.32247	3.44639	0.269371	0.23704	0.157965	0.221459	15.5622	3.95998	0.00104233
WBGene00005058	sra-32	0.67909	1.02618	0.85198	0.852418	0.409515	0.37371	0.186782	0.323336	2.63632	1.39853	0.0121778
WBGene00005083	srd-5	1.15316	1.40235	1.44292	1.33281	0.0956631	0.0491057	0.0490867	0.0646185	20.6258	4.36638	0.000159847
WBGene00005117	srd-39	0.953619	1.15706	1.52483	1.21184	0	0.0501634	0.100288	0.0501504	24.164	4.59479	0.00237994
WBGene00005237	srh-11	0.369903	0.363329	0.574572	0.435935	0.0460292	0.0945107	0.047237	0.0625923	6.96467	2.80005	0.0063116
WBGene00005258	srh-35	0.705364	0.692827	0.442472	0.613554	0.236311	0.145563	0.194009	0.191961	3.19624	1.67638	0.00925101
WBGene00005272	srh-49	0.368834	0.465787	0.525169	0.453263	0.0917923	0.235594	0.188402	0.171929	2.63633	1.39853	0.0106248
WBGene00005290	srh-69	1.69378	1.82468	2.07931	1.86592	0.523519	0.830628	0.732622	0.695589	2.68251	1.42358	0.00127862
WBGene00005345	srh-128	1.62162	1.35146	1.33576	1.43628	0.428034	0.527324	0.571046	0.508801	2.82288	1.49717	0.000810277
WBGene00005456	srh-250	0.168286	0.385687	0.40662	0.320198	0.146585	0.0501634	0.0501439	0.0822975	3.89073	1.96004	0.0451623
WBGene00005572	sri-60	0.326524	0.267267	0.295862	0.296551	0.0948064	0.0973319	0.194588	0.128909	2.30047	1.20193	0.0106065
WBGene00005615	srj-27	0.163262	0.16036	0.0986205	0.140748	0	0	0.0486471	0.0162157	8.67972	3.11765	0.00943063
WBGene00005654	srr-3	2.20795	2.12353	2.04229	2.12459	1.12189	0.822696	1.02797	0.990852	2.14421	1.10044	0.000351243
WBGene00005657	srr-6	7.85128	7.23247	7.79726	7.62701	0.65684	0.555337	0.79303	0.668402	11.4108	3.51233	4.9017e-06
WBGene00005690	sru-27	0.635963	0.989044	0.672282	0.765763	0.276978	0.331749	0.33162	0.313449	2.44302	1.28867	0.016381
WBGene00005702	sru-39	1.92774	2.65087	1.24765	1.94209	0.815593	0.394033	0.541584	0.583737	3.327	1.73422	0.0326788
WBGene00005722	srv-11	0.366714	0.566023	0.474682	0.46914	0	0.140544	0.0468298	0.0624579	7.51129	2.90906	0.00457303
WBGene00005816	srw-69	1.47947	1.92195	1.47027	1.6239	0.45728	0.554818	0.725249	0.579115	2.8041	1.48754	0.00343064
WBGene00005818	srw-71	6.19164	5.11406	4.50517	5.27029	1.0623	1.00671	1.42562	1.16488	4.52433	2.1777	0.00129556
WBGene00005895	srx-4	0.208354	0.102325	0.141591	0.150757	0.0453716	0	0	0.0151239	9.96812	3.31732	0.0169958
WBGene00005897	srx-6	0.176999	0.289756	0.213837	0.226864	0.0513918	0.0527608	0.0527404	0.0522977	4.33794	2.11701	0.00626175
WBGene00005953	srx-62	0.605679	0.713897	0.548802	0.622793	0.263789	0.162489	0.27071	0.232329	2.68064	1.42258	0.00282997
WBGene00005971	srx-80	0.731488	0.93956	0.611813	0.760954	0.19605	0.352227	0.301792	0.283357	2.6855	1.42519	0.010859
WBGene00006146	str-87	5.17737	4.65255	4.74109	4.857	0.383808	0.0985082	0.39388	0.292065	16.6298	4.0557	1.73972e-05
WBGene00006163	str-112	8.52226	10.6851	8.7667	9.32467	2.53266	1.83802	2.19581	2.18883	4.26012	2.09089	0.000559149
WBGene00006179	str-130	1.28146	1.96355	1.25402	1.49968	0.267892	0.229191	0.183281	0.226788	6.61267	2.72523	0.00548951
WBGene00006205	str-160	1.39004	1.99549	1.88926	1.75827	0.372553	0.573716	0.334538	0.426936	4.11834	2.04206	0.00268768
WBGene00006261	str-230	0.498567	0.440735	0.587273	0.508859	0.260566	0.222923	0.178269	0.220586	2.30685	1.20592	0.00411125
WBGene00006651	tts-2	209.594	183.394	190.642	194.543	15.2859	13.8077	18.514	15.8692	12.2591	3.61579	2.30184e-05
WBGene00007085	AH10.4	1.24869	0.9812	1.13143	1.12044	0.652606	0	0.66973	0.440779	2.54196	1.34594	0.0437223
WBGene00007232	C01G10.5	10.3017	11.9584	10.0132	10.7578	4.89454	5.19243	4.68811	4.92503	2.18431	1.12718	0.000727078
WBGene00007262	jud-4	2.22886	1.96471	1.60529	1.93295	0.497808	0.511069	0.510871	0.506582	3.81567	1.93194	0.00139485
WBGene00007364	stdh-3	1.19417	1.82979	1.21187	1.41194	0.416072	0.427155	0.555086	0.466105	3.02924	1.59895	0.0114562
WBGene00007376	C06C3.5	1.10351	0.880668	0.749914	0.911365	0.420532	0.370058	0.246609	0.345733	2.63604	1.39837	0.0080422
WBGene00007380	C06C6.6	0.0422665	0.0622729	0.0574461	0.0539951	0.0184081	0.0188985	0	0.0124355	4.342	2.11836	0.0086577
WBGene00007670	stg-1	3.92437	3.02514	3.7809	3.57681	1.03848	1.55479	1.90943	1.5009	2.38311	1.25284	0.00527949
WBGene00007716	fbxa-82	3.29781	2.79069	2.57438	2.88762	0.662897	0.499075	0.408175	0.523382	5.51724	2.46395	0.00047978
WBGene00007829	oac-5	0.427681	0.4695	0.296338	0.39784	0	0.0224974	0.0674659	0.0299878	13.2667	3.72974	0.00274427
WBGene00007833	oac-6	6.1977	5.72374	6.15265	6.0247	0.838812	0.70659	0.772533	0.772645	7.7975	2.96301	4.61756e-06
WBGene00007903	lgc-21	3.33228	3.2019	2.7568	3.09699	0.283948	0.226732	0.42091	0.31053	9.97325	3.31806	0.000109626
WBGene00007948	C35A5.4	0.501003	0.45109	0.718763	0.556952	0.0363666	0	0	0.0121222	45.9448	5.52183	0.00279488
WBGene00008138	C47D12.4	0.227887	0.279795	0.258108	0.255264	0.0496252	0.0509472	0	0.0335241	7.61432	2.92872	0.000597913
WBGene00008449	E01G6.1	0.874707	0.661785	0.674752	0.737082	0.113257	0.0634225	0.158495	0.111725	6.59729	2.72187	0.00108433
WBGene00008486	ugt-44	7.6029	8.44183	7.27015	7.77163	2.85318	3.43978	2.57883	2.95726	2.62798	1.39396	0.00036654
WBGene00008496	F01D5.6	2.18268	1.89651	1.44525	1.84148	0.511867	0.788254	0.900512	0.733545	2.51038	1.32791	0.0104528
WBGene00008602	oac-14	29.7392	28.5871	30.2872	29.5378	1.0634	0.633201	1.22226	0.972952	30.359	4.92405	7.14808e-07
WBGene00008678	stdh-2	11.5001	11.6669	11.2518	11.4729	0.235144	0.434535	1.01352	0.561067	20.4484	4.35392	2.00916e-06
WBGene00008679	F11A5.13	4.46076	2.95273	3.6904	3.7013	0.337874	0.60703	0.34674	0.430548	8.59672	3.10379	0.00181286
WBGene00008712	F11E6.9	3.80987	3.659	4.98637	4.15175	1.76992	1.28709	1.665	1.574	2.63771	1.39928	0.00439532
WBGene00008727	F13A7.12	0.980549	0.856107	0.740391	0.859016	0.237252	0.43843	0.535651	0.403778	2.12745	1.08912	0.0152594
WBGene00008790	F14D7.3	3.32479	2.61256	3.46446	3.13394	1.30323	1.18928	1.63463	1.37571	2.27804	1.1878	0.00401226
WBGene00008809	cyp-13A11	4.8217	3.18038	3.73111	3.91106	0	0.0314732	0.0629219	0.031465	124.299	6.95767	0.00129984
WBGene00008811	F14F7.4	1.10198	0.854518	1.62912	1.19521	0.303119	0.311194	0.46661	0.360307	3.31718	1.72996	0.0235886
WBGene00008812	F14F7.5	0.466298	0.477093	0.299277	0.414223	0.118466	0.104247	0.191046	0.13792	3.00337	1.58658	0.0121608
WBGene00008842	chil-28	1.61053	1.71017	1.71566	1.67879	0.0189575	0	0	0.00631917	265.666	8.05347	1.11413e-06
WBGene00008967	F20B10.3	6.73526	4.7779	6.04627	5.85314	0.869149	0.278844	1.11494	0.754312	7.75957	2.95598	0.00122599
WBGene00009028	F21H7.2	13.9267	12.1267	13.4836	13.179	1.45466	1.9201	1.75941	1.71139	7.70074	2.945	3.32068e-05
WBGene00009110	F25D1.5	33.1318	35.3149	30.8899	33.1122	5.11309	4.13887	5.60044	4.9508	6.68825	2.74163	3.09989e-05
WBGene00009153	F26D2.15	2.73464	3.0058	1.5339	2.42478	0.567145	0.407578	0.232811	0.402511	6.02413	2.59075	0.011941
WBGene00009226	cyp-37B1	18.682	20.0359	22.8494	20.5224	4.08263	5.2835	4.33728	4.5678	4.49284	2.16763	0.00023867
WBGene00009446	F35H8.1	1.17504	0.94431	1.16149	1.09361	0.372189	0.573156	0.477444	0.474263	2.30592	1.20534	0.00281787
WBGene00009473	F36D3.8	0.674526	0.662537	0.713048	0.68337	0.0489622	0	0	0.0163207	41.8713	5.38789	7.47596e-06
WBGene00009488	oac-20	0.655004	0.470149	0.867416	0.66419	0.219439	0.225285	0.202677	0.2158	3.0778	1.6219	0.017542
WBGene00009490	fbxa-99	2.90162	2.36608	3.62127	2.96299	0.715319	0.734374	0.783028	0.74424	3.98123	1.99321	0.00367132
WBGene00009805	F47B8.4	0.735778	1.02383	0.944469	0.901357	0	0.109662	0	0.036554	24.6582	4.624	0.000755128
WBGene00009855	clec-22	2.04312	2.00681	1.61392	1.88795	0.867015	0.843264	0.561958	0.757412	2.49263	1.31767	0.00258346
WBGene00009964	fip-6	5.66765	3.61849	4.62188	4.63601	0.24684	0.63354	0.379977	0.420119	11.035	3.46401	0.00219332
WBGene00009983	cut-2	23.4474	24.2811	22.8798	23.5361	1.52486	0.474387	1.56487	1.18804	19.8109	4.30822	2.05808e-06
WBGene00010121	F55G7.3	2.19084	3.68898	2.48139	2.78707	0.613393	0.979585	0.489603	0.694194	4.01483	2.00534	0.012207
WBGene00010291	F58H10.1	134.11	122.159	121.652	125.974	47.7707	53.0632	47.8187	49.5509	2.54231	1.34614	6.64542e-05
WBGene00010319	F59B10.3	19.6562	15.0488	15.2276	16.6442	5.32784	4.08905	6.31699	5.24463	3.17357	1.66611	0.0022451
WBGene00010464	K01D12.5	3.73184	4.62695	4.37918	4.24599	0.106578	0	0.437497	0.181358	23.4122	4.54919	0.000166382
WBGene00010469	K01D12.10	1.95332	1.2279	1.4867	1.55597	0.0680575	0	0.20953	0.0925291	16.816	4.07177	0.00269913
WBGene00010528	K03D3.2	1.50877	2.09943	1.13924	1.58248	0.547589	0.22487	0.561958	0.444806	3.55769	1.83094	0.0193362
WBGene00010658	K08D8.4	15.3638	13.7289	14.5107	14.5345	6.85152	6.95813	5.43788	6.41584	2.2654	1.17977	0.000282596
WBGene00010662	K08E3.2	0.592341	0.77575	0.596352	0.654814	0.0573288	0.117712	0.294166	0.156402	4.18674	2.06583	0.00591884
WBGene00010746	K10D11.2	1.6039	2.73067	1.79238	2.04231	0.419122	0.143429	0.0955822	0.219378	9.30958	3.21872	0.00735737
WBGene00010931	M162.5	8.1891	9.31741	7.85657	8.45436	0.839191	0.861546	1.05995	0.92023	9.18723	3.19963	7.30223e-05
WBGene00010987	R03C1.1	7.70813	5.59274	6.63331	6.64473	0.236177	0.103915	0.311624	0.217238	30.5872	4.93486	0.000469738
WBGene00011009	cyp-14A4	4.65781	3.32404	4.15446	4.04544	0.0950903	0	0.130114	0.0750681	53.8902	5.75195	0.000528594
WBGene00011081	R07B1.9	8.04818	6.63195	9.43105	8.03706	1.55037	1.40136	1.62564	1.52579	5.26747	2.39711	0.00130434
WBGene00011190	swt-6	19.6316	18.1219	17.9071	18.5535	1.71573	1.05686	2.34767	1.70676	10.8706	3.44236	1.38433e-05
WBGene00011192	srh-24	0.800104	0.898152	0.932103	0.876786	0.0995616	0.102214	0.408696	0.203491	4.30873	2.10726	0.00360515
WBGene00011266	idpb-5	6.05112	4.64818	5.76406	5.48778	1.21635	0.624374	1.10957	0.983429	5.58025	2.48033	0.00063594
WBGene00011278	R74.2	1.01471	0.548171	1.01136	0.858081	0.0883863	0.0907408	0.272117	0.150415	5.70477	2.51217	0.0131499
WBGene00011313	idpb-4	2.83784	2.7874	3.5843	3.06984	0.37453	0.230704	0.384358	0.329864	9.30639	3.21822	0.000475119
WBGene00011371	T02D1.4	7.3821	7.77168	6.24542	7.13307	3.62364	3.53781	3.09894	3.42013	2.08561	1.06047	0.00157475
WBGene00011535	idpc-5	2.20597	1.27017	2.75699	2.07771	0.066259	0	0.0679976	0.0447522	46.4269	5.53689	0.00945952
WBGene00011536	idpc-6	2.74167	2.48579	2.54791	2.59179	0.244937	0.0628654	0.062841	0.123548	20.978	4.39081	1.48089e-05
WBGene00011537	idpc-7	23.4516	18.965	23.8023	22.073	0.433093	0.222315	0.814838	0.490082	45.0394	5.49311	0.000160975
WBGene00011671	cyp-13A4	6.36858	6.22102	5.70712	6.09891	0.1524	0.0312919	0.187679	0.12379	49.2681	5.62258	8.40838e-06
WBGene00011673	cyp-13A6	15.3246	15.9281	14.8431	15.3652	1.29457	1.29952	1.6533	1.4158	10.8527	3.43998	2.00178e-06
WBGene00011674	cyp-13A8	10.4381	9.51524	9.68463	9.87933	0.435924	0.255735	0.479317	0.390325	25.3105	4.66166	5.33045e-06
WBGene00011699	cyp-34A2	1.97847	3.06317	2.40036	2.48066	0.613393	0.599746	0.719416	0.644185	3.85086	1.94518	0.00446144
WBGene00011895	T21C9.9	7.7576	6.1584	5.71316	6.54305	0.586246	0.696894	0.791618	0.691586	9.46094	3.24198	0.000718476
WBGene00011948	rocf-1	1.39372	1.20301	1.16079	1.25251	0.453716	0.453214	0.453038	0.453323	2.76295	1.46621	0.000367709
WBGene00012107	T27F6.8	19.2095	17.7289	17.1101	18.0162	7.82954	7.90846	10.1085	8.61551	2.09113	1.06428	0.000640762
WBGene00012448	cyp-33D3	2.79824	2.60572	3.29281	2.89892	0.0633093	0.0324979	0.0649705	0.0535925	54.0919	5.75734	0.000155948
WBGene00012535	Y37A1A.2	14.9912	15.0418	15.4032	15.1454	1.53073	2.05259	1.44266	1.67533	9.04026	3.17636	5.12064e-07
WBGene00012682	asp-16	1.56528	1.6279	2.0023	1.73183	0.200506	0.494033	0.288074	0.327538	5.28741	2.40256	0.000970313
WBGene00012686	Y39B6A.27	4.3228	5.72283	4.63211	4.89258	2.22648	1.68073	1.88169	1.92964	2.5355	1.34227	0.00283621
WBGene00012942	idpc-1	41.968	30.4213	37.2438	36.5443	1.17114	0.472346	1.54526	1.06291	34.3813	5.10355	0.000458259
WBGene00012961	Y47H10A.5	14.452	16.8034	16.195	15.8168	3.82545	3.19669	4.29103	3.77105	4.19427	2.06842	9.88647e-05
WBGene00012969	Y48A6B.8	3.33186	2.3773	2.5348	2.74799	1.28683	1.51787	1.20821	1.33764	2.05436	1.03869	0.0103899
WBGene00013074	hmit-1.2	7.69877	8.58768	8.97832	8.42159	0.0423093	0.0217182	0.0651292	0.0430522	195.613	7.61186	2.47307e-05
WBGene00013148	Y53F4A.2	0.491253	0.643362	0.445121	0.526579	0	0.146435	0.146378	0.0976044	5.39503	2.43163	0.00514809
WBGene00013169	Y53F4B.23	7.98182	7.63543	7.29517	7.63747	2.9624	4.28267	4.09487	3.77998	2.02051	1.01472	0.00108384
WBGene00013449	Y67A6A.1	0.856487	0.721083	0.665192	0.747588	0	0.218834	0.109374	0.109403	6.83336	2.7726	0.00167997
WBGene00013452	Y67A10A.3	0.150627	0.192335	0.122834	0.155266	0.0262408	0.0269399	0.0134647	0.0222151	6.98919	2.80512	0.00299445
WBGene00013748	ssu-1	1.89814	1.64761	1.5199	1.68855	0.346055	0.315799	0.355135	0.338996	4.98103	2.31644	0.000269394
WBGene00013900	ugt-18	22.0209	25.7693	25.6961	24.4954	3.5289	3.18466	2.89136	3.20164	7.6509	2.93563	6.98815e-05
WBGene00013905	ugt-4	26.8096	30.6754	29.4136	28.9662	6.79396	7.70915	4.88339	6.46216	4.48243	2.16428	9.01181e-05
WBGene00014039	ZK662.2	9.96239	6.83002	7.02762	7.94001	1.10656	0.717496	1.13559	0.986549	8.04826	3.00868	0.00243571
WBGene00014135	ZK896.4	2.42101	1.90959	2.72546	2.35202	1.21417	1.1153	0.950918	1.09346	2.15098	1.10499	0.00732302
WBGene00014194	ZK1037.6	0.58884	0.952616	1.09847	0.879976	0.0603423	0.0929246	0.0928885	0.0820518	10.7246	3.42286	0.00628802
WBGene00014700	C37A5.6	16.7808	12.2093	11.6383	13.5428	0.541366	1.85263	0.740762	1.04492	12.9606	3.69606	0.00173466
WBGene00014707	C47A10.t4	4.62193	3.78315	2.79193	3.73234	0.670989	0	1.37719	0.682727	5.46681	2.4507	0.0099635
WBGene00014873	Y38E10A.t3	3.79811	2.98448	6.1946	4.32573	0.66167	0	0	0.220557	19.6128	4.29372	0.0142226
WBGene00015034	B0207.11	0.618697	0.66847	0.953016	0.746728	0.161675	0.221309	0.0553058	0.146097	5.11119	2.35366	0.0063951
WBGene00015246	scl-23	0.620335	0.507757	0.468401	0.532164	0.270171	0	0.18484	0.151671	3.50868	1.81093	0.0143294
WBGene00015337	gsto-2	15.6013	13.8205	16.4834	15.3017	0.923061	0.368531	0.894656	0.728749	20.9972	4.39213	5.43831e-05
WBGene00015361	C02H6.1	0.163262	0.16036	0.0986205	0.140748	0	0.048666	0.0486471	0.0324377	4.33902	2.11737	0.0151956
WBGene00015362	fbxa-105	9.39362	7.49374	8.03624	8.30787	2.24287	2.85695	2.30172	2.46718	3.36735	1.75161	0.000615358
WBGene00015458	idpb-1	0.760944	0.467137	0.948043	0.725375	0	0	0.170053	0.0566844	12.7967	3.6777	0.011437
WBGene00015535	C06E4.6	10.8366	11.7084	8.83706	10.4607	0.555247	0.570038	0.797744	0.64101	16.319	4.02848	0.000325901
WBGene00015660	catp-3	31.5639	34.7164	32.774	33.0181	10.6959	9.75913	12.4817	10.9789	3.00741	1.58852	5.46498e-05
WBGene00016017	C23G10.11	13.7488	13.356	10.2673	12.4573	3.29007	6.62032	4.05168	4.65402	2.67668	1.42045	0.00638724
WBGene00016063	delm-2	0.957948	0.85271	1.08499	0.965215	0.338983	0.214162	0.240839	0.264662	3.64698	1.8667	0.000814786
WBGene00016064	acd-1	6.44417	6.19438	6.96191	6.53349	0.839581	1.10822	1.03393	0.993911	6.57352	2.71667	2.08054e-05
WBGene00016231	C29G2.3	0.988	1.66361	1.98227	1.54463	0.0614712	0	0.189253	0.0835747	18.482	4.20805	0.0080631
WBGene00016271	irld-23	0.594891	0.657358	0.336892	0.529714	0.0323863	0.166245	0.0332361	0.0772892	6.85366	2.77687	0.0136857
WBGene00016340	gba-2	8.72868	8.09723	7.37546	8.06713	0.512909	0.681447	1.0837	0.759352	10.6237	3.40921	6.77587e-05
WBGene00016693	srbc-20	10.6433	9.18509	10.3685	10.0656	0.267943	0.385113	0.714931	0.455996	22.0739	4.46427	3.29256e-05
WBGene00016732	phat-1	2.4581	1.26208	1.92355	1.88125	0.0486621	0	0.0998781	0.0495134	37.9947	5.24773	0.00618229
WBGene00016733	phat-2	3.80693	2.11891	3.73688	3.22091	0.663205	0.226957	0.283586	0.39125	8.23236	3.04131	0.00759347
WBGene00016765	C49C8.1	0.749706	0.876644	0.938086	0.854812	0.342064	0.223476	0.35104	0.305527	2.79783	1.48431	0.00135176
WBGene00016786	cyp-35A4	2.39634	2.66527	3.48047	2.84736	0.276264	0.220596	0.189009	0.228623	12.4544	3.63858	0.00131763
WBGene00016845	C50F7.5	208.812	226.833	242.37	226.005	50.5005	59.3555	55.1941	55.0167	4.10794	2.03841	6.93746e-05
WBGene00016882	C52E2.3	1.42546	1.03167	0.883729	1.11362	0.1307	0	0	0.0435667	25.5613	4.67589	0.00307694
WBGene00016929	C54F6.12	1.48824	1.82724	1.93845	1.75131	0.243062	0.249537	0.0831468	0.191915	9.12541	3.18989	0.000434374
WBGene00016948	scrt-1	1.01849	0.500193	0.553707	0.690796	0	0.273236	0.0910434	0.121427	5.689	2.50818	0.0359029
WBGene00017024	D1022.5	2.98868	2.27506	1.96332	2.40902	0.325411	0	0.53432	0.286577	8.40617	3.07145	0.00339213
WBGene00017060	D2063.1	49.67	47.4417	47.672	48.2612	3.18191	3.17593	4.44457	3.6008	13.4029	3.74447	6.92914e-07
WBGene00017073	D2096.6	7.83543	5.86737	7.4511	7.0513	1.68937	1.11	1.24826	1.34921	5.22624	2.38577	0.000811192
WBGene00017205	cest-29	17.7147	14.896	14.9109	15.8405	1.01183	1.24077	1.41335	1.22198	12.963	3.69633	0.000101609
WBGene00017438	F13H8.5	2.55959	2.08063	3.38554	2.67525	0.922565	0.789284	0.973072	0.894974	2.9892	1.57976	0.00985342
WBGene00017484	F15E6.3	61.4358	56.4541	53.727	57.2056	17.7136	23.2582	21.0487	20.6735	2.7671	1.46837	0.000191804
WBGene00017486	F15E6.5	1.10491	0.542634	1.00115	0.882896	0.0962429	0	0.296305	0.130849	6.74743	2.75434	0.0177544
WBGene00017505	F16B4.3	0.240456	0.38648	0.237683	0.288206	0.0571226	0	0.078162	0.0450948	6.39111	2.67607	0.0110899
WBGene00017754	chtb-2	1.2823	0.766657	1.04401	1.03099	0.226627	0.199426	0.265798	0.230617	4.47056	2.16046	0.00597554
WBGene00018292	idpc-2	20.1996	13.3083	17.898	17.1353	0.389076	0.0887646	0.221825	0.233222	73.4721	6.19912	0.00113142
WBGene00018413	cyp-33C4	17.4404	18.0622	17.4556	17.6527	3.81376	4.01324	4.82706	4.21802	4.18508	2.06526	3.48872e-06
WBGene00018428	fbxa-183	1.09585	1.07637	0.677006	0.949742	0.260329	0.178176	0.356214	0.264906	3.5852	1.84205	0.00934147
WBGene00018448	F45D11.1	34.6825	35.3849	33.2951	34.4541	13.693	15.7564	15.5746	15.008	2.29572	1.19894	2.72773e-05
WBGene00018534	F47B7.3	0.432013	0.509201	0.861177	0.600797	0	0.154532	0.0772359	0.0772559	7.77672	2.95916	0.0198551
WBGene00018539	nhr-185	2.51783	2.24409	2.32364	2.36185	0.487368	0.542047	1.33375	0.787722	2.99833	1.58416	0.0052675
WBGene00018543	ugt-32	10.1513	12.5823	10.6998	11.1445	1.7444	1.85263	1.91364	1.83689	6.06704	2.60099	0.000227304
WBGene00018558	srt-20	0.432782	0.42509	0.441159	0.43301	0.329853	0.145131	0.145075	0.206687	2.09501	1.06696	0.0214913
WBGene00018600	F48C1.8	0.513548	0.441367	0.523488	0.492801	0.0559157	0.0574053	0.114766	0.076029	6.48175	2.69638	0.000208686
WBGene00018620	F48G7.9	2.27295	2.09302	1.54463	1.9702	0.123741	0.127037	0.126988	0.125922	15.6462	3.96774	0.00108926
WBGene00018726	F53A9.3	1.09605	1.50719	1.29106	1.2981	0.190943	0.294044	0.195953	0.22698	5.71901	2.51577	0.000969324
WBGene00018750	F53C3.6	37.8182	35.9705	39.5262	37.7717	16.7314	18.4079	21.3962	18.8452	2.00432	1.00311	0.000376718
WBGene00018754	F53C3.11	1.04853	0.830562	0.735537	0.871544	0.0294621	0	0.0302352	0.0198991	43.7982	5.4528	0.000795329
WBGene00018903	F55G1.7	7.16634	8.2913	7.36978	7.60914	1.76162	1.69059	1.13973	1.53065	4.9712	2.31359	0.000107204
WBGene00018946	F56C3.9	7.03822	7.92129	7.90518	7.62156	0.830191	0.655621	0.655366	0.713726	10.6786	3.41664	2.03782e-05
WBGene00018970	clec-68	3.04283	1.87754	2.68639	2.53559	0.373782	0.313968	0.557949	0.415233	6.10641	2.61033	0.00384538
WBGene00019036	irld-36	0.577614	0.425511	0.654215	0.552447	0.22012	0.0968501	0.258167	0.191712	2.88165	1.52689	0.0121889
WBGene00019100	F59B1.8	25.399	24.7034	25.1538	25.0854	5.12493	3.22357	5.62979	4.65943	5.38379	2.42862	1.14161e-05
WBGene00019178	scl-12	0.959523	0.85679	0.79038	0.868898	0.227944	0.234016	0.3119	0.257953	3.36843	1.75208	0.000404666
WBGene00019415	K05F6.4	2.26255	2.73518	2.52318	2.50697	0.682199	1.2062	0.738994	0.875796	2.8625	1.51728	0.00161988
WBGene00019445	frpr-12	3.88989	5.57001	5.6054	5.02177	1.87785	2.4308	1.96902	2.09255	2.39983	1.26293	0.00774182
WBGene00019471	cyp-35B2	2.44295	1.96976	2.67607	2.36292	0.127041	0.0326062	0.130374	0.0966736	24.4423	4.61131	0.00042001
WBGene00019565	cyp-35A3	5.05389	4.79406	4.89295	4.91364	0.422128	0.464329	0.618865	0.501774	9.79253	3.29168	1.36797e-06
WBGene00019659	K11H12.3	1.90109	2.63337	2.69427	2.40957	0.721821	1.04619	0.740762	0.836257	2.88138	1.52676	0.00466043
WBGene00019675	K12D9.1	4.3914	3.82319	3.70772	3.9741	0.130402	0.223126	0.22304	0.192189	20.678	4.37003	5.97097e-05
WBGene00019758	M03F4.4	0.444657	0.327565	0.503626	0.425283	0	0.0994092	0	0.0331364	12.8343	3.68193	0.00309212
WBGene00019839	R02F11.1	4.09684	2.74975	3.58838	3.47832	0.951615	0.488482	0.305183	0.58176	5.97897	2.5799	0.00269486
WBGene00019906	R05G9R.1	2.0717	1.90538	1.94541	1.97416	0.0656201	0.151578	0.067342	0.0948469	20.8142	4.3795	5.25797e-06
WBGene00019921	fbxc-34	0.17181	0.112504	0.155676	0.146663	0.049885	0	0.102388	0.0507577	2.88948	1.53081	0.0496439
WBGene00019926	fbxc-27	0.136732	0.179069	0.247784	0.187862	0	0.0407578	0.0814838	0.0407472	4.61042	2.2049	0.0212511
WBGene00019968	R08F11.4	54.1575	46.666	47.5762	49.4666	5.47901	4.26859	7.2179	5.65517	8.74714	3.12881	6.3304e-05
WBGene00020154	T01G6.10	1.32108	1.9464	1.61598	1.62782	0.402755	0.413484	0.47237	0.429537	3.78972	1.92209	0.00274999
WBGene00020156	T02B11.4	99.1105	90.5146	88.9237	92.8496	17.3365	14.4702	18.2977	16.7015	5.55936	2.47492	2.2621e-05
WBGene00020237	phat-4	38.6463	33.0265	30.7996	34.1575	5.01476	4.21726	7.50053	5.57752	6.12414	2.61451	0.000352888
WBGene00020240	T05B4.9	2.68743	1.14148	1.90856	1.91249	0.316336	0.129905	0.649274	0.365172	5.23723	2.38881	0.0304377
WBGene00020242	phat-5	89.8823	73.3461	77.3346	80.1877	4.88351	2.98683	7.35754	5.07596	15.7975	3.98163	0.000127604
WBGene00020394	T10B5.8	5.31176	5.79306	5.74235	5.61572	0.765817	0.36035	0.622181	0.582783	9.63605	3.26844	1.29528e-05
WBGene00020414	T10E9.4	0.0520884	0.0511626	0.047197	0.0501493	0	0	0.0232811	0.00776037	6.46224	2.69203	0.00583478
WBGene00020675	spe-51	1.32165	0.839983	1.02143	1.06102	0.338594	0.382376	0.347479	0.35615	2.97914	1.57489	0.0075105
WBGene00020700	T22F3.11	195.893	213.638	202.379	203.97	4.24601	4.27194	5.72275	4.7469	42.9691	5.42523	2.78673e-06
WBGene00020774	rcd-1	3.92508	4.08359	5.40492	4.47119	1.597	2.00902	1.56966	1.72523	2.59165	1.37387	0.00498494
WBGene00020803	T25E4.1	18.9193	15.6229	19.317	17.9531	0.631962	0.19963	1.04765	0.626414	28.6601	4.84097	0.00013202
WBGene00020832	T26C12.2	3.858	2.8235	2.19339	2.95829	0.395354	0.473534	0.405729	0.424872	6.96278	2.79966	0.00645235
WBGene00021083	W08E12.2	14.4642	13.1712	12.9694	13.5349	0.13124	0	0.269368	0.133536	101.358	6.66332	9.36616e-06
WBGene00021084	idpp-12	24.3419	16.7064	23.5326	21.527	0.709724	0.182158	0.728347	0.540076	39.8591	5.31684	0.000985544
WBGene00021085	W08E12.4	2.90404	2.56718	3.50845	2.99323	0	0	0.0865315	0.0288438	103.773	6.69729	0.000431136
WBGene00021087	W08E12.6	9.45308	7.29541	9.02424	8.59091	0.588151	0.150955	0.37724	0.372115	23.0867	4.52899	0.000255792
WBGene00021158	Y4C6B.4	6.38603	6.96948	6.9179	6.7578	0.741674	0.96448	0.583538	0.763231	8.8542	3.14636	1.01681e-05
WBGene00021212	Y18H1A.8	0.479762	0.471234	0.760741	0.570579	0	0	0.214431	0.0714771	7.98269	2.99687	0.0137514
WBGene00021491	comt-4	3.98516	2.56456	2.98835	3.17935	0.119699	0.184332	0.06142	0.121817	26.0995	4.70595	0.00193571
WBGene00021580	clec-174	1.15689	1.05796	1.12054	1.1118	0.451731	0.535113	0.392264	0.459702	2.41851	1.27412	0.000207583
WBGene00021581	clec-70	5.30923	5.29155	4.63379	5.07819	0.476062	0.314193	0.453657	0.414637	12.2473	3.61439	3.37111e-05
WBGene00021585	clec-74	7.0806	6.35326	4.82043	6.08476	0.733439	0.650299	1.02639	0.803376	7.57399	2.92105	0.00144708
WBGene00021747	Y50D4C.2	0.514353	0.774656	0.590332	0.626447	0.0597369	0.153321	0.306522	0.173193	3.61704	1.85481	0.0127149
WBGene00021805	nspg-7.2	3.01207	4.28209	2.94468	3.41295	1.03566	0.496181	1.06283	0.86489	3.9461	1.98043	0.00572093
WBGene00021837		5.63502	6.34881	6.4574	6.14708	0.866186	0.88926	1.33337	1.02961	5.97032	2.57781	6.87308e-05
WBGene00021947	srt-23	1.32774	1.65526	1.38815	1.45705	0.177928	0.228335	0.182597	0.196287	7.42308	2.89202	0.000245302
WBGene00021971	Y57G7A.8	0.74751	1.16252	0.846643	0.918891	0.0542599	0.445643	0.334102	0.278002	3.30534	1.7248	0.0199488
WBGene00022142	Y71G12B.2	3.51031	1.9464	3.07806	2.84492	1.18361	1.21514	1.11344	1.17073	2.43004	1.28098	0.0231015
WBGene00022181	pho-9	57.6401	55.1682	63.3671	58.7251	18.704	18.2233	16.4097	17.779	3.30306	1.7238	8.48346e-05
WBGene00022267	Y73C8C.10	4.27031	4.39606	3.72048	4.12895	0.214596	0.29375	0.146818	0.218388	18.9065	4.24081	5.05755e-05
WBGene00022275	txt-7	0.672453	0.587112	0.812407	0.690657	0.195247	0.33408	0.20037	0.243232	2.8395	1.50563	0.00498451
WBGene00022679	ZK180.5	26.3115	23.059	24.0462	24.4722	0.568027	0.405676	1.36862	0.780776	31.3435	4.97009	1.94076e-05
WBGene00022789	lron-2	6.70379	5.39195	6.60146	6.2324	0.506811	0.361956	0.58795	0.485572	12.8352	3.68203	0.000175388
WBGene00022809	ZK697.14	15.8974	15.3999	15.1313	15.4762	0.254081	0.586912	1.36893	0.73664	21.0092	4.39295	3.21954e-06
WBGene00022856	cth-2	150.926	142.381	149.773	147.693	55.4036	55.3346	59.3844	56.7075	2.60448	1.38099	6.97401e-06
WBGene00023248	C33E10.9	0.346157	0.22667	0.2091	0.260642	0	0.103184	0	0.0343947	7.57798	2.92181	0.0147862
WBGene00044081	D1086.11	0.476834	0.327851	0.302439	0.369041	0.0415346	0	0	0.0138449	26.6554	4.73636	0.00319106
WBGene00044139	F42D1.4	0.959523	0.471234	1.08677	0.839177	0	0.429029	0	0.14301	5.86797	2.55286	0.0419205
WBGene00044147	M163.11	1.05468	1.25792	1.29694	1.20318	0.19686	0.404209	0.67342	0.42483	2.83215	1.5019	0.00773168
WBGene00044168	M05D6.10	1.47708	1.00752	1.11531	1.19997	0.285913	0.110073	0.293415	0.2298	5.22177	2.38454	0.00325454
WBGene00044312	K04C2.8	0.849268	0.750755	0.692564	0.764196	0.221926	0.151892	0.0759166	0.149912	5.09764	2.34983	0.000589879
WBGene00044492	Y54G2A.49	3.4592	4.40785	3.72735	3.8648	1.46585	2.09014	1.67146	1.74249	2.21798	1.14925	0.00324301
WBGene00044642	clec-69	0.789039	0.652644	0.752571	0.731418	0.0723466	0.0371369	0.0371225	0.0488687	14.967	3.90371	8.73057e-05
WBGene00044768	M117.7	1.10081	1.08124	0.734953	0.972335	0.302798	0.207243	0.310743	0.273595	3.55392	1.82941	0.00479436
WBGene00044811	nta-1	96.4077	104.198	96.6988	99.1014	9.94187	10.5176	11.9636	10.8077	9.16953	3.19685	4.62132e-06
WBGene00044900	cnc-11	9.88148	8.12582	7.07955	8.36228	0.800676	0.822005	1.43795	1.02021	8.19662	3.03503	0.00096026
WBGene00045096	K01A6.7	3.40765	2.00825	2.6245	2.68014	0.890471	1.52365	0.761531	1.05855	2.53189	1.34021	0.025778
WBGene00045305	ZC250.4	27.277	26.315	27.1053	26.8991	3.20423	3.84819	3.8467	3.63304	7.40402	2.88831	3.65586e-07
WBGene00045460	C15C8.8	0.872294	1.37086	0.632304	0.958487	0.151962	0.0780053	0.233925	0.154631	6.19855	2.63193	0.0223793
WBGene00048978	21ur-4432	31.253	28.1394	37.7576	32.3833	2.26858	13.9741	0	5.41422	5.98116	2.58043	0.00646295
WBGene00049922	21ur-4841	10.4177	20.465	21.2386	17.3738	0	4.65803	6.98433	3.88079	4.47687	2.16249	0.028953
WBGene00050397	21ur-2124	13.0221	17.9069	11.7992	14.2428	2.26858	2.32901	4.65622	3.08461	4.61737	2.20707	0.00528867
WBGene00050958	F28B1.10	0.617126	0.757697	1.04845	0.807758	0.134387	0.275934	0.41374	0.274687	2.94065	1.55613	0.0239421
WBGene00077691	idpc-4	37.6899	33.6798	37.8095	36.3931	0.802232	0.063354	1.0766	0.647395	56.2146	5.81287	1.35967e-05
WBGene00077788	W07G4.8	4.30913	5.86044	4.80551	4.99169	0.577457	1.77852	0.888915	1.08163	4.61497	2.20632	0.00255567
WBGene00086558	F12E12.12	30.3849	27.4407	28.9081	28.9112	1.47038	1.13216	1.81075	1.4711	19.6529	4.29667	6.08374e-06
WBGene00164969	K09C8.9	1.9275	2.24822	1.96481	2.04684	0.524672	0.861838	1.29225	0.892922	2.2923	1.1968	0.00912519
WBGene00173113	21ur-12989	18.2309	25.5813	18.8788	20.897	2.26858	0	4.65622	2.30827	9.05312	3.17841	0.00235534
WBGene00174712	21ur-8653	83.3415	63.9532	87.3144	78.203	0	4.65803	4.65622	3.10475	25.1882	4.65468	0.000525759
WBGene00194821	dmsr-16	0.443306	0.32657	0.451886	0.407254	0.0965354	0.099107	0.0495343	0.0817255	4.98319	2.31707	0.00170675
WBGene00195512	C04C11.5	0.764935	0.751339	1.03965	0.851976	0.333148	0	0	0.111049	7.67204	2.93961	0.00701022
WBGene00196330	ZC190.12	1.27193	2.49864	3.07329	2.28129	0.369304	0.379142	0.378995	0.375814	6.07026	2.60176	0.0230286
WBGene00197775	F26F12.11	0.79265	1.16784	1.07732	1.0126	0.690438	0.354415	0.354278	0.466377	2.17121	1.1185	0.0264832
WBGene00199003	F42G9.10	3.64619	2.8651	3.63417	3.38182	0.317601	0.326062	0	0.214554	15.7621	3.97838	0.000347056
WBGene00199172	Y71D11A.8	6.14526	12.0721	13.3636	10.527	0	0.549543	0	0.183181	57.4677	5.84468	0.00974357
WBGene00200713	T07F10.11	0.57876	1.70542	1.04882	1.111	0.252065	0	0	0.0840215	13.2228	3.72496	0.0382433
WBGene00201083	F59D12.13	3.98802	3.91714	2.58108	3.49541	0.992504	0.509472	1.01855	0.840175	4.16034	2.0567	0.00548361
WBGene00206411	R13D11.11	3.3761	3.31609	2.44725	3.04648	0.294075	0	0.301792	0.198622	15.3381	3.93904	0.00084076
WBGene00219326	F36D3.16	1.99064	1.02651	1.66843	1.56186	0.433487	0.178014	0.400376	0.337292	4.63058	2.21119	0.014168
WBGene00219422	Y52B11A.20	3.31177	2.96588	3.22141	3.16635	0.848446	0.783943	0.348284	0.660224	4.79588	2.2618	0.000183663
WBGene00219592	linc-84	5.46928	5.53007	7.36065	6.12	0.980828	0.575404	0.503283	0.686505	8.91472	3.15619	0.00104359
WBGene00219672	anr-54	0.729238	0.463473	0.427549	0.540087	0	0.0767205	0	0.0255735	21.119	4.40047	0.00641671
WBGene00219767	linc-131	0.919207	0.902869	0.832888	0.884988	0	0	0.410843	0.136948	6.46224	2.69203	0.00583478
WBGene00219814	C14A11.14	2.41292	3.95005	3.64388	3.33562	0	1.43851	0	0.479503	6.95641	2.79834	0.0131066
WBGene00219882	F08B6.7	2.03824	3.67036	1.53903	2.41588	0	0.303784	0.607333	0.303706	7.95466	2.9918	0.0339714
WBGene00220001	K02F3.15	6.56314	9.51624	5.66364	7.24767	1.08892	0.558963	0.558746	0.735543	9.8535	3.30064	0.00521432
WBGene00235086	T04C12.32	1.36245	0.955885	1.23451	1.18428	0.339076	0.348109	0.521961	0.403049	2.93831	1.55499	0.00430873
WBGene00235259	T05C7.6	2.01819	1.18939	2.01153	1.7397	0.703177	0.541431	0.721628	0.655412	2.65436	1.40837	0.018179
WBGene00235338	C24H12.19	0.584098	0.678028	0.529248	0.597125	0.0925053	0.237424	0.237332	0.189087	3.15794	1.65898	0.00327913
WBGene00271797	E02C12.19	0.588095	0.866463	0.355246	0.603268	0	0	0.087617	0.0292057	20.6558	4.36848	0.0189223
WBGene00271822	F11G11.15	1.48391	1.24932	1.15248	1.29524	0	0.189571	0.757989	0.315853	4.10076	2.03589	0.0168496
WBGene00284855	C04C11.25	21.3562	11.2558	13.2152	15.2757	0.453716	0	0.465622	0.306446	49.848	5.63946	0.00843254

## Sheet: Figure 4—figure supplement 1A2
								GO analysis of 304 genes
	GO analysis of 304 genes							ID	Gene	term	found
	Term	Expected	Observed	Enrichment Fold Change	P value	Q value		WBGene00011699	cyp-34A2	iron ion binding GO:0005506	1
	iron ion binding GO:0005506	0.95	13	14	9.6e-13	2.8e-10		WBGene00019565	cyp-35A3	iron ion binding GO:0005506	1
	tetrapyrrole binding GO:0046906	1.2	13	11	3.3e-11	4.7e-09		WBGene00011671	cyp-13A4	iron ion binding GO:0005506	1
	response to xenobiotic stimulus GO:0009410	0.46	7	15	2.1e-08	2e-06		WBGene00016786	cyp-35A4	iron ion binding GO:0005506	1
	steroid hydroxylase activity GO:0008395	0.31	6	20	2.3e-08	2e-06		WBGene00012448	cyp-33D3	iron ion binding GO:0005506	1
	oxidoreductase activity acting on paired donors with incorporation or reduction of molecular oxygen reduced flavin or flavoprotein as one donor and incorporation of one atom of oxygen GO:0016712	0.32	6	19	2.7e-08	2e-06		WBGene00018413	cyp-33C4	iron ion binding GO:0005506	1
	response to biotic stimulus GO:0009607	3.2	16	5	3.7e-08	2e-06		WBGene00008809	cyp-13A11	iron ion binding GO:0005506	1
	biological process involved in interspecies interaction between organisms GO:0044419	3.2	16	5	3.8e-08	2e-06		WBGene00011674	cyp-13A8	iron ion binding GO:0005506	1
	defense response GO:0006952	3.2	15	4.7	2.2e-07	7.9e-06		WBGene00009226	cyp-37B1	iron ion binding GO:0005506	1
	response to topologically incorrect protein GO:0035966	1.6	10	6.3	7.1e-07	2.3e-05		WBGene00000372	cyp-13A7	iron ion binding GO:0005506	1
	immune system process GO:0002376	2.3	10	4.4	2e-05	0.00058		WBGene00019471	cyp-35B2	iron ion binding GO:0005506	1
	ABC-type transporter activity GO:0140359	0.39	4	10	4.6e-05	0.0012		WBGene00011009	cyp-14A4	iron ion binding GO:0005506	1
	structural constituent of cuticle GO:0042302	1.3	7	5.3	6e-05	0.0014		WBGene00011673	cyp-13A6	iron ion binding GO:0005506	1
	collagen trimer GO:0005581	1.3	7	5.3	6.2e-05	0.0014		WBGene00011699	cyp-34A2	tetrapyrrole binding GO:0046906	1
	pharynx development GO:0060465	0.28	3	11	0.00017	0.0034		WBGene00019565	cyp-35A3	tetrapyrrole binding GO:0046906	1
	detection of chemical stimulus GO:0009593	1.5	6	4.1	0.00072	0.014		WBGene00011671	cyp-13A4	tetrapyrrole binding GO:0046906	1
	sensory perception of smell GO:0007608	1.5	6	4.1	0.00072	0.014		WBGene00016786	cyp-35A4	tetrapyrrole binding GO:0046906	1
	sodium channel activity GO:0005272	0.26	2	7.7	0.0023	0.038		WBGene00012448	cyp-33D3	tetrapyrrole binding GO:0046906	1
	chemosensory behavior GO:0007635	1.8	6	3.3	0.0024	0.038		WBGene00018413	cyp-33C4	tetrapyrrole binding GO:0046906	1
	cGMP metabolic process GO:0046068	0.27	2	7.4	0.0025	0.038		WBGene00008809	cyp-13A11	tetrapyrrole binding GO:0046906	1
	defense response to Gram-positive bacterium GO:0050830	0.58	3	5.1	0.0029	0.041		WBGene00011674	cyp-13A8	tetrapyrrole binding GO:0046906	1
	organic acid metabolic process GO:0006082	3.5	9	2.5	0.0033	0.046		WBGene00009226	cyp-37B1	tetrapyrrole binding GO:0046906	1
	digestive system development GO:0055123	0.61	3	4.9	0.0034	0.046		WBGene00000372	cyp-13A7	tetrapyrrole binding GO:0046906	1
	cyclic nucleotide metabolic process GO:0009187	0.31	2	6.5	0.0036	0.046		WBGene00019471	cyp-35B2	tetrapyrrole binding GO:0046906	1
	chitin binding GO:0008061	0.32	2	6.2	0.0041	0.05		WBGene00011009	cyp-14A4	tetrapyrrole binding GO:0046906	1
	transporter activity GO:0005215	7.7	15	1.9	0.0054	0.063		WBGene00011673	cyp-13A6	tetrapyrrole binding GO:0046906	1
	transmembrane transport GO:0055085	7.8	15	1.9	0.0061	0.067		WBGene00011699	cyp-34A2	response to xenobiotic stimulus GO:0009410	1
	peptide receptor activity GO:0001653	1.7	5	3	0.0067	0.071		WBGene00003999	pgp-5	response to xenobiotic stimulus GO:0009410	1
	sodium ion transport GO:0006814	0.78	3	3.9	0.0078	0.08		WBGene00019565	cyp-35A3	response to xenobiotic stimulus GO:0009410	1
	monocarboxylic acid biosynthetic process GO:0072330	0.42	2	4.7	0.0088	0.087		WBGene00016786	cyp-35A4	response to xenobiotic stimulus GO:0009410	1
	ATP hydrolysis activity GO:0016887	1.8	5	2.8	0.01	0.096		WBGene00012448	cyp-33D3	response to xenobiotic stimulus GO:0009410	1
								WBGene00018413	cyp-33C4	response to xenobiotic stimulus GO:0009410	1
								WBGene00019471	cyp-35B2	response to xenobiotic stimulus GO:0009410	1
								WBGene00011699	cyp-34A2	steroid hydroxylase activity GO:0008395	1
								WBGene00019565	cyp-35A3	steroid hydroxylase activity GO:0008395	1
								WBGene00016786	cyp-35A4	steroid hydroxylase activity GO:0008395	1
								WBGene00012448	cyp-33D3	steroid hydroxylase activity GO:0008395	1
								WBGene00018413	cyp-33C4	steroid hydroxylase activity GO:0008395	1
								WBGene00019471	cyp-35B2	steroid hydroxylase activity GO:0008395	1
								WBGene00011699	cyp-34A2	oxidoreductase activity acting on paired donors with incorporation or reduction of molecular oxygen reduced flavin or flavoprotein as one donor and incorporation of one atom of oxygen GO:0016712	1
								WBGene00019565	cyp-35A3	oxidoreductase activity acting on paired donors with incorporation or reduction of molecular oxygen reduced flavin or flavoprotein as one donor and incorporation of one atom of oxygen GO:0016712	1
								WBGene00016786	cyp-35A4	oxidoreductase activity acting on paired donors with incorporation or reduction of molecular oxygen reduced flavin or flavoprotein as one donor and incorporation of one atom of oxygen GO:0016712	1
								WBGene00012448	cyp-33D3	oxidoreductase activity acting on paired donors with incorporation or reduction of molecular oxygen reduced flavin or flavoprotein as one donor and incorporation of one atom of oxygen GO:0016712	1
								WBGene00018413	cyp-33C4	oxidoreductase activity acting on paired donors with incorporation or reduction of molecular oxygen reduced flavin or flavoprotein as one donor and incorporation of one atom of oxygen GO:0016712	1
								WBGene00019471	cyp-35B2	oxidoreductase activity acting on paired donors with incorporation or reduction of molecular oxygen reduced flavin or flavoprotein as one donor and incorporation of one atom of oxygen GO:0016712	1
								WBGene00000631	col-54	response to biotic stimulus GO:0009607	1
								WBGene00014700	C37A5.6	response to biotic stimulus GO:0009607	1
								WBGene00003999	pgp-5	response to biotic stimulus GO:0009607	1
								WBGene00015362	fbxa-105	response to biotic stimulus GO:0009607	1
								WBGene00000560	cnc-6	response to biotic stimulus GO:0009607	1
								WBGene00000503	cht-1	response to biotic stimulus GO:0009607	1
								WBGene00044900	cnc-11	response to biotic stimulus GO:0009607	1
								WBGene00009805	F47B8.4	response to biotic stimulus GO:0009607	1
								WBGene00010658	K08D8.4	response to biotic stimulus GO:0009607	1
								WBGene00021581	clec-70	response to biotic stimulus GO:0009607	1
								WBGene00000558	cnc-4	response to biotic stimulus GO:0009607	1
								WBGene00018970	clec-68	response to biotic stimulus GO:0009607	1
								WBGene00008486	ugt-44	response to biotic stimulus GO:0009607	1
								WBGene00021580	clec-174	response to biotic stimulus GO:0009607	1
								WBGene00019100	F59B1.8	response to biotic stimulus GO:0009607	1
								WBGene00009226	cyp-37B1	response to biotic stimulus GO:0009607	1
								WBGene00000631	col-54	biological process involved in interspecies interaction between organisms GO:0044419	1
								WBGene00014700	C37A5.6	biological process involved in interspecies interaction between organisms GO:0044419	1
								WBGene00003999	pgp-5	biological process involved in interspecies interaction between organisms GO:0044419	1
								WBGene00015362	fbxa-105	biological process involved in interspecies interaction between organisms GO:0044419	1
								WBGene00000560	cnc-6	biological process involved in interspecies interaction between organisms GO:0044419	1
								WBGene00000503	cht-1	biological process involved in interspecies interaction between organisms GO:0044419	1
								WBGene00044900	cnc-11	biological process involved in interspecies interaction between organisms GO:0044419	1
								WBGene00009805	F47B8.4	biological process involved in interspecies interaction between organisms GO:0044419	1
								WBGene00010658	K08D8.4	biological process involved in interspecies interaction between organisms GO:0044419	1
								WBGene00021581	clec-70	biological process involved in interspecies interaction between organisms GO:0044419	1
								WBGene00000558	cnc-4	biological process involved in interspecies interaction between organisms GO:0044419	1
								WBGene00018970	clec-68	biological process involved in interspecies interaction between organisms GO:0044419	1
								WBGene00008486	ugt-44	biological process involved in interspecies interaction between organisms GO:0044419	1
								WBGene00021580	clec-174	biological process involved in interspecies interaction between organisms GO:0044419	1
								WBGene00019100	F59B1.8	biological process involved in interspecies interaction between organisms GO:0044419	1
								WBGene00009226	cyp-37B1	biological process involved in interspecies interaction between organisms GO:0044419	1
								WBGene00000631	col-54	defense response GO:0006952	1
								WBGene00014700	C37A5.6	defense response GO:0006952	1
								WBGene00003999	pgp-5	defense response GO:0006952	1
								WBGene00015362	fbxa-105	defense response GO:0006952	1
								WBGene00000560	cnc-6	defense response GO:0006952	1
								WBGene00044900	cnc-11	defense response GO:0006952	1
								WBGene00009805	F47B8.4	defense response GO:0006952	1
								WBGene00010658	K08D8.4	defense response GO:0006952	1
								WBGene00021581	clec-70	defense response GO:0006952	1
								WBGene00000558	cnc-4	defense response GO:0006952	1
								WBGene00018970	clec-68	defense response GO:0006952	1
								WBGene00008486	ugt-44	defense response GO:0006952	1
								WBGene00021580	clec-174	defense response GO:0006952	1
								WBGene00019100	F59B1.8	defense response GO:0006952	1
								WBGene00009226	cyp-37B1	defense response GO:0006952	1
								WBGene00004099	abu-15	response to topologically incorrect protein GO:0035966	1
								WBGene00000031	abu-8	response to topologically incorrect protein GO:0035966	1
								WBGene00011535	T06E4.8	response to topologically incorrect protein GO:0035966	1
								WBGene00017073	D2096.6	response to topologically incorrect protein GO:0035966	1
								WBGene00000024	abu-1	response to topologically incorrect protein GO:0035966	1
								WBGene00015660	catp-3	response to topologically incorrect protein GO:0035966	1
								WBGene00000503	cht-1	response to topologically incorrect protein GO:0035966	1
								WBGene00018292	F41E6.11	response to topologically incorrect protein GO:0035966	1
								WBGene00000033	abu-10	response to topologically incorrect protein GO:0035966	1
								WBGene00000034	abu-11	response to topologically incorrect protein GO:0035966	1
								WBGene00014700	C37A5.6	immune system process GO:0002376	1
								WBGene00015362	fbxa-105	immune system process GO:0002376	1
								WBGene00000560	cnc-6	immune system process GO:0002376	1
								WBGene00044900	cnc-11	immune system process GO:0002376	1
								WBGene00009805	F47B8.4	immune system process GO:0002376	1
								WBGene00010658	K08D8.4	immune system process GO:0002376	1
								WBGene00000558	cnc-4	immune system process GO:0002376	1
								WBGene00018970	clec-68	immune system process GO:0002376	1
								WBGene00008486	ugt-44	immune system process GO:0002376	1
								WBGene00019100	F59B1.8	immune system process GO:0002376	1
								WBGene00003999	pgp-5	ABC-type transporter activity GO:0140359	1
								WBGene00004001	pgp-7	ABC-type transporter activity GO:0140359	1
								WBGene00004006	pgp-12	ABC-type transporter activity GO:0140359	1
								WBGene00004000	pgp-6	ABC-type transporter activity GO:0140359	1
								WBGene00000631	col-54	structural constituent of cuticle GO:0042302	1
								WBGene00000714	col-141	structural constituent of cuticle GO:0042302	1
								WBGene00000610	col-33	structural constituent of cuticle GO:0042302	1
								WBGene00000628	col-51	structural constituent of cuticle GO:0042302	1
								WBGene00000641	col-65	structural constituent of cuticle GO:0042302	1
								WBGene00009983	cut-2	structural constituent of cuticle GO:0042302	1
								WBGene00000678	col-104	structural constituent of cuticle GO:0042302	1
								WBGene00000631	col-54	collagen trimer GO:0005581	1
								WBGene00000714	col-141	collagen trimer GO:0005581	1
								WBGene00000610	col-33	collagen trimer GO:0005581	1
								WBGene00000628	col-51	collagen trimer GO:0005581	1
								WBGene00000641	col-65	collagen trimer GO:0005581	1
								WBGene00000678	col-104	collagen trimer GO:0005581	1
								WBGene00045096	K01A6.7	collagen trimer GO:0005581	1
								WBGene00004099	abu-15	pharynx development GO:0060465	1
								WBGene00000031	abu-8	pharynx development GO:0060465	1
								WBGene00004174	abu-14	pharynx development GO:0060465	1
								WBGene00006179	str-130	detection of chemical stimulus GO:0009593	1
								WBGene00006205	str-160	detection of chemical stimulus GO:0009593	1
								WBGene00006261	str-230	detection of chemical stimulus GO:0009593	1
								WBGene00005058	sra-32	detection of chemical stimulus GO:0009593	1
								WBGene00006146	str-87	detection of chemical stimulus GO:0009593	1
								WBGene00006163	str-112	detection of chemical stimulus GO:0009593	1
								WBGene00006179	str-130	sensory perception of smell GO:0007608	1
								WBGene00006205	str-160	sensory perception of smell GO:0007608	1
								WBGene00006261	str-230	sensory perception of smell GO:0007608	1
								WBGene00005058	sra-32	sensory perception of smell GO:0007608	1
								WBGene00006146	str-87	sensory perception of smell GO:0007608	1
								WBGene00006163	str-112	sensory perception of smell GO:0007608	1
								WBGene00016063	delm-2	sodium channel activity GO:0005272	1
								WBGene00016064	acd-1	sodium channel activity GO:0005272	1
								WBGene00006179	str-130	chemosensory behavior GO:0007635	1
								WBGene00006205	str-160	chemosensory behavior GO:0007635	1
								WBGene00006261	str-230	chemosensory behavior GO:0007635	1
								WBGene00006146	str-87	chemosensory behavior GO:0007635	1
								WBGene00006163	str-112	chemosensory behavior GO:0007635	1
								WBGene00001528	gcy-1	chemosensory behavior GO:0007635	1
								WBGene00001530	gcy-3	cGMP metabolic process GO:0046068	1
								WBGene00001528	gcy-1	cGMP metabolic process GO:0046068	1
								WBGene00003999	pgp-5	defense response to Gram-positive bacterium GO:0050830	1
								WBGene00021581	clec-70	defense response to Gram-positive bacterium GO:0050830	1
								WBGene00009226	cyp-37B1	defense response to Gram-positive bacterium GO:0050830	1
								WBGene00011699	cyp-34A2	organic acid metabolic process GO:0006082	1
								WBGene00007364	stdh-3	organic acid metabolic process GO:0006082	1
								WBGene00019565	cyp-35A3	organic acid metabolic process GO:0006082	1
								WBGene00022856	cth-2	organic acid metabolic process GO:0006082	1
								WBGene00016786	cyp-35A4	organic acid metabolic process GO:0006082	1
								WBGene00008678	stdh-2	organic acid metabolic process GO:0006082	1
								WBGene00012448	cyp-33D3	organic acid metabolic process GO:0006082	1
								WBGene00018413	cyp-33C4	organic acid metabolic process GO:0006082	1
								WBGene00019471	cyp-35B2	organic acid metabolic process GO:0006082	1
								WBGene00004099	abu-15	digestive system development GO:0055123	1
								WBGene00000031	abu-8	digestive system development GO:0055123	1
								WBGene00004174	abu-14	digestive system development GO:0055123	1
								WBGene00001530	gcy-3	cyclic nucleotide metabolic process GO:0009187	1
								WBGene00001528	gcy-1	cyclic nucleotide metabolic process GO:0009187	1
								WBGene00000503	cht-1	chitin binding GO:0008061	1
								WBGene00008449	E01G6.1	chitin binding GO:0008061	1
								WBGene00003999	pgp-5	transporter activity GO:0005215	1
								WBGene00013074	hmit-1.2	transporter activity GO:0005215	1
								WBGene00007903	lgc-21	transporter activity GO:0005215	1
								WBGene00015660	catp-3	transporter activity GO:0005215	1
								WBGene00004001	pgp-7	transporter activity GO:0005215	1
								WBGene00011190	swt-6	transporter activity GO:0005215	1
								WBGene00021158	Y4C6B.4	transporter activity GO:0005215	1
								WBGene00004006	pgp-12	transporter activity GO:0005215	1
								WBGene00004000	pgp-6	transporter activity GO:0005215	1
								WBGene00007670	stg-1	transporter activity GO:0005215	1
								WBGene00003058	lov-1	transporter activity GO:0005215	1
								WBGene00020700	T22F3.11	transporter activity GO:0005215	1
								WBGene00010931	M162.5	transporter activity GO:0005215	1
								WBGene00016063	delm-2	transporter activity GO:0005215	1
								WBGene00016064	acd-1	transporter activity GO:0005215	1
								WBGene00003999	pgp-5	transmembrane transport GO:0055085	1
								WBGene00013074	hmit-1.2	transmembrane transport GO:0055085	1
								WBGene00007903	lgc-21	transmembrane transport GO:0055085	1
								WBGene00015660	catp-3	transmembrane transport GO:0055085	1
								WBGene00004001	pgp-7	transmembrane transport GO:0055085	1
								WBGene00011190	swt-6	transmembrane transport GO:0055085	1
								WBGene00021158	Y4C6B.4	transmembrane transport GO:0055085	1
								WBGene00004006	pgp-12	transmembrane transport GO:0055085	1
								WBGene00004000	pgp-6	transmembrane transport GO:0055085	1
								WBGene00007670	stg-1	transmembrane transport GO:0055085	1
								WBGene00003058	lov-1	transmembrane transport GO:0055085	1
								WBGene00020700	T22F3.11	transmembrane transport GO:0055085	1
								WBGene00010931	M162.5	transmembrane transport GO:0055085	1
								WBGene00016063	delm-2	transmembrane transport GO:0055085	1
								WBGene00016064	acd-1	transmembrane transport GO:0055085	1
								WBGene00001530	gcy-3	peptide receptor activity GO:0001653	1
								WBGene00005816	srw-69	peptide receptor activity GO:0001653	1
								WBGene00005818	srw-71	peptide receptor activity GO:0001653	1
								WBGene00194821	dmsr-16	peptide receptor activity GO:0001653	1
								WBGene00001528	gcy-1	peptide receptor activity GO:0001653	1
								WBGene00015660	catp-3	sodium ion transport GO:0006814	1
								WBGene00016063	delm-2	sodium ion transport GO:0006814	1
								WBGene00016064	acd-1	sodium ion transport GO:0006814	1
								WBGene00007364	stdh-3	monocarboxylic acid biosynthetic process GO:0072330	1
								WBGene00008678	stdh-2	monocarboxylic acid biosynthetic process GO:0072330	1
								WBGene00003999	pgp-5	ATP hydrolysis activity GO:0016887	1
								WBGene00015660	catp-3	ATP hydrolysis activity GO:0016887	1
								WBGene00004001	pgp-7	ATP hydrolysis activity GO:0016887	1
								WBGene00004006	pgp-12	ATP hydrolysis activity GO:0016887	1
								WBGene00004000	pgp-6	ATP hydrolysis activity GO:0016887	1

## Sheet: Figure 4—figure supplement 1B
		WTSS/WTOP50		nsySS/WTSS		差距量化展现依赖程度
name	Public Name	FoldChange	Log2FC	FoldChange	Log2FC	FC(WTSS/WTOP50)的负数	FC(nsySS/WTSS)的倒数
WBGene00005058	sra-32	2.63632	1.39853	0.467357	-1.0974	-2.63632	2.13969
WBGene00006205	str-160	4.11834	2.04206	0.39391	-1.34406	-4.11834	2.53865
WBGene00006261	str-230	2.30685	1.20592	0.333619	-1.58373	-2.30685	2.99744
WBGene00006146	str-87	16.6298	4.0557	0.298894	-1.7423	-16.6298	3.34567
WBGene00006163	str-112	4.26012	2.09089	0.29055	-1.78314	-4.26012	3.44175
WBGene00006179	str-130	6.61267	2.72523	0.0488636	-4.3551	-6.61267	20.4651
