# Supplementary material for: Neuronal detection triggers systemic digestive shutdown in response to adverse food sources in Caenorhabditis elegans
Source: eLife. 2025 Oct 3;14:RP104028. doi: 10.7554/eLife.104028 (PMC12494379; doi:10.7554/eLife.104028)
Supplement: Figure 4—figure supplement 2—source data 1. [file elife-104028-fig4-figsupp2-data1.xlsx]

## Sheet: Figure 4—figure supplement 2A
Original worm length	Control RNAi	str-130 RNAi	sra-32 RNAi	str-230 RNAi	str-87 RNAi	str-112 RNAi	str-160 RNAi		Relative worm length	Control RNAi	str-130 RNAi	sra-32 RNAi	str-230 RNAi	str-87 RNAi	str-112 RNAi	str-160 RNAi
	n=45	n=45	n=38	n=46	n=49	n=42	n=48			n=45	n=45	n=38	n=46	n=49	n=42	n=48		t` test	P value	P value summary	Significantly different (P < 0.05)
	119.078	180.707	144.288	202.966	157.309	132.553	140.033			0.972366	1.47562	1.17823	1.65738	1.28455	1.0824	1.14348		str-130 RNAi vs Control RNAi	<0.0001	****	yes
	113.927	159.793	117.196	191.981	169.298	139.259	115.922			0.930304	1.30484	0.956998	1.56768	1.38245	1.13716	0.946595		sra-32 RNAi vs Control RNAi	0.1286	ns	no
	117.575	206.943	104.645	121.434	118.207	177.308	110.816			0.960093	1.68985	0.854509	0.991605	0.965254	1.44786	0.9049		str-230 RNAi vs Control RNAi	0.016	*	yes
	101.76	151.652	108.309	119.329	189.749	134.929	125.677			0.830951	1.23836	0.884429	0.974416	1.54945	1.1018	1.02625		str-87 RNAi vs Control RNAi	<0.0001	****	yes
	123.056	105.965	133.562	106.587	147.826	215.336	115.307			1.00485	0.865288	1.09064	0.870367	1.20712	1.75839	0.941573		str-112 RNAi vs Control RNAi	0.0005	***	yes
	120.751	162.907	131.971	142.011	244.211	178.81	127.881			0.986028	1.33026	1.07765	1.15963	1.99418	1.46013	1.04425		str-160 RNAi vs Control RNAi	0.0942	ns	no
	149.684	251.263	123.08	154.375	100.68	122.14	132.949			1.22229	2.05176	1.00505	1.26059	0.822132	0.99737	1.08563
	110.503	209.722	107.002	142.991	117.39	148.312	129.24			0.902345	1.71255	0.873756	1.16763	0.958582	1.21109	1.05535
	121.48	200.753	140.154	108.367	150.661	176.909	121.081			0.99198	1.63931	1.14447	0.884902	1.23027	1.4446	0.988722
	108.106	201.862	114.143	127.727	202.957	120.296	152.809			0.882771	1.64836	0.932068	1.04299	1.6573	0.982312	1.24781
	106.403	139.848	143.316	121.169	181.984	111.035	97.509			0.868865	1.14197	1.17029	0.989441	1.48604	0.906689	0.796238
	112.623	136.076	145.576	117.847	152.905	120.277	115.264			0.919656	1.11117	1.18874	0.962314	1.24859	0.982157	0.941222
	112.585	145.93	120.264	119.988	157.949	190.332	120.799			0.919346	1.19163	0.982051	0.979797	1.28978	1.55421	0.98642
	136.266	231.645	131.654	120.484	194.097	154.24	117.955			1.11272	1.89156	1.07506	0.983847	1.58496	1.25949	0.963196
	118.93	252.467	119.037	191.87	156.955	100.008	107.577			0.971158	2.06159	0.972031	1.56677	1.28166	0.816645	0.878451
	116.836	188.128	110.685	143.185	208.035	116.207	118.396			0.954059	1.53621	0.903831	1.16922	1.69877	0.948922	0.966797
	109.215	188.526	134.679	130.684	177.173	123.924	128.925			0.891827	1.53946	1.09976	1.06714	1.44676	1.01194	1.05277
	127.998	183.606	144.097	123.481	174.84	137.419	169.818			1.04521	1.49929	1.17667	1.00832	1.42771	1.12214	1.3867
	117.802	239.014	130.482	123.409	137.481	180.081	115.401			0.961947	1.95174	1.06549	1.00773	1.12264	1.4705	0.942341
	122.395	214.079	129.14	147.078	163.39	100.285	102.79			0.999452	1.74812	1.05453	1.20101	1.33421	0.818906	0.839362
	123.634	102.339	174.564	132.938	197.123	136.113	134.942			1.00957	0.835679	1.42545	1.08554	1.60967	1.11147	1.10191
	134.036	129.92	123.747	138.712	104.182	128.554	117.727			1.09451	1.0609	1.01049	1.13269	0.850729	1.04975	0.961334
	116.223	158.311	148.967	174.454	163.511	105.434	120.506			0.949053	1.29273	1.21643	1.42456	1.3352	0.860952	0.984027
	142.268	147.419	121.69	153.531	163.746	162.848	115.887			1.16173	1.20379	0.993695	1.2537	1.33712	1.32978	0.946309
	118.677	120.082	130.682	116.574	138.848	143.307	120.877			0.969092	0.980565	1.06712	0.951919	1.1338	1.17022	0.987056
	144.468	116.525	121.572	145.264	140.576	168.388	120.272			1.1797	0.951519	0.992732	1.1862	1.14791	1.37502	0.982116
	134.571	208.391	118.964	113.121	128.413	111.802	173.1			1.09888	1.70168	0.971435	0.923723	1.04859	0.912952	1.4135
	134.015	144.081	143.141	123.912	137.803	114.746	130.073			1.09434	1.17654	1.16886	1.01184	1.12527	0.936992	1.06215
	111.029	181.731	161.343	112.198	139.633	132.239	121.098			0.90664	1.48398	1.31749	0.916186	1.14021	1.07984	0.988861
	112.15	141.706	119.703	120.085	163.031	148.842	129.266			0.915794	1.15714	0.97747	0.980589	1.33128	1.21541	1.05556
	129.442	156.531	123.149	131.083	149.526	131.828	107.756			1.057	1.2782	1.00561	1.0704	1.221	1.07648	0.879913
	135.656	211.837	120.711	127.982	124.457	119.172	157.008			1.10774	1.72982	0.985701	1.04507	1.01629	0.973134	1.28209
	129.82	190.331	117.294	116.252	170.791	144.638	107.371			1.06008	1.5542	0.957798	0.94929	1.39464	1.18108	0.876769
	114.661	139.627	105.585	122.611	123.73	136.828	121.55			0.936298	1.14017	0.862185	1.00122	1.01035	1.11731	0.992552
	111.2	121.344	118.985	160.191	202.268	168.845	151.645			0.908036	0.99087	0.971607	1.30809	1.65168	1.37875	1.2383
	119.87	144.54	113.095	125.285	127.039	154.488	167.309			0.978834	1.18028	0.92351	1.02305	1.03737	1.26152	1.36621
	124.296	121.983	113.877	127.082	144.556	134.607	164.433			1.01498	0.996088	0.929896	1.03773	1.18041	1.09917	1.34273
	122.159	192.529	114.532	128.548	128.296	127.31	132.85			0.997525	1.57215	0.935245	1.0497	1.04764	1.03959	1.08483
	126.253	122.82		110.185	169.711	109.045	126.06			1.03096	1.00292		0.899748	1.38582	0.890439	1.02938
	120.533	133.477		114.516	121.178	109.904	121.229			0.984247	1.08995		0.935114	0.989514	0.897453	0.989931
	121.403	132.361		110.654	127.087	122.182	119.8			0.991352	1.08083		0.903578	1.03777	0.997713	0.978262
	117.326	217.032		121.974	169.048	108.079	116.84			0.95806	1.77224		0.996014	1.38041	0.882551	0.954091
	149.027	130.548		136.847	144.568		124.58			1.21692	1.06603		1.11746	1.18051		1.01729
	124.976	131.286		103.208	182.046		144.987			1.02053	1.07205		0.842775	1.48655		1.18393
	126.128	133.285		118.003	110.419		131.355			1.02994	1.08838		0.963588	0.901659		1.07262
				114.998	167.167		150.12						0.93905	1.36505		1.22585
					141.842		119.855							1.15825		0.978711
					155.998		114.156							1.27385		0.932174
					142.44									1.16314
	average:
	122.462	166.243	126.971	131.678	154.737	138.068	127.683

## Sheet: Figure 4—figure supplement 2B
Original worm length	Control RNAi	str-130 RNAi	sra-32 RNAi	str-230 RNAi	str-87 RNAi	str-112 RNAi	str-160 RNAi		Relative worm length	Control RNAi	str-130 RNAi	sra-32 RNAi	str-230 RNAi	str-87 RNAi	str-112 RNAi	str-160 RNAi
	n=25	n=34	n=33	n=34	n=26	n=36	n=22			n=25	n=34	n=33	n=34	n=26	n=36	n=22		t` test	P value	P value summary	Significantly different (P < 0.05)
	459.98	251.421	242.746	307.984	290.02	282.092	256.344			1.53781	0.840556	0.811553	1.02966	0.969601	0.943096	0.857014		str-130 RNAi vs Control RNAi	0.7161	ns	no
	254.86	249.74	294.052	299.348	207.386	305.128	242.892			0.852053	0.834936	0.98308	1.00079	0.693337	1.02011	0.812041		sra-32 RNAi vs Control RNAi	0.7946	ns	no
	206.067	389.121	249.959	307.263	250.295	347.789	206.375			0.688927	1.30092	0.835668	1.02725	0.836791	1.16274	0.689957		str-230 RNAi vs Control RNAi	0.3428	ns	no
	286.213	269.483	371.418	227.495	443.174	322.222	400.879			0.956873	0.900941	1.24173	0.760566	1.48163	1.07726	1.34023		str-87 RNAi vs Control RNAi	0.3577	ns	no
	413.501	347.12	306.189	257.575	427.802	312.083	252.38			1.38242	1.1605	1.02366	0.86113	1.43024	1.04336	0.843762		str-112 RNAi vs Control RNAi	0.625	ns	no
	297.879	319.95	260.082	234.173	321.879	331.041	327.964			0.995875	1.06966	0.869511	0.782892	1.07611	1.10674	1.09646		str-160 RNAi vs Control RNAi	0.1216	ns	no
	227.228	215.846	258.97	304.749	445.207	297.015	326.902			0.759673	0.721621	0.865794	1.01884	1.48842	0.992986	1.09291
	314.033	405.018	409.355	293.039	407.348	298.213	261.167			1.04988	1.35406	1.36856	0.979694	1.36185	0.996992	0.873139
	298.329	387.608	350.083	305.159	223.238	344.148	327.635			0.997379	1.29586	1.1704	1.02021	0.746334	1.15056	1.09536
	324.808	350.629	337.78	237.773	413.937	397.887	397.207			1.0859	1.17223	1.12927	0.794927	1.38388	1.33022	1.32795
	332.982	375.887	273.77	238.397	354.863	243.487	336.785			1.11323	1.25667	0.915273	0.797014	1.18639	0.814031	1.12595
	332.154	324.077	328.818	260.33	297.305	320.482	327.678			1.11046	1.08346	1.09931	0.87034	0.993956	1.07144	1.0955
	250.415	263.205	287.469	284.053	314.549	319.558	270.468			0.837192	0.879952	0.961072	0.949652	1.05161	1.06835	0.904234
	345.465	246.012	306.433	328.941	376.042	255.597	388.443			1.15497	0.822472	1.02447	1.09972	1.25719	0.854517	1.29865
	188.765	411.54	327.056	305.493	318.679	258.787	277.02			0.631083	1.37587	1.09342	1.02133	1.06541	0.865182	0.926139
	224.419	309.442	266.012	336.423	304.973	249.262	258.319			0.750282	1.03453	0.889337	1.12474	1.01959	0.833338	0.863617
	341.989	257.19	329.948	322.739	232.177	339.369	365.6			1.14334	0.859843	1.10309	1.07899	0.776219	1.13459	1.22228
	302.621	289.147	280.712	321.606	210.842	341.127	459.58			1.01173	0.966682	0.938482	1.0752	0.704891	1.14046	1.53648
	232.177	347.159	243.575	365.07	257.536	235.143	289.121			0.776219	1.16063	0.814325	1.22051	0.860999	0.786135	0.966595
	397.405	318.933	317.683	265.387	247.431	335.032	343.824			1.32861	1.06626	1.06208	0.887247	0.827216	1.12009	1.14948
	239.894	246.07	204.405	326.764	382.779	307.415	211.189			0.802018	0.822666	0.683371	1.09244	1.27971	1.02776	0.706051
	240.99	254.639	257.232	257.299	313.128	353.449	208.442			0.805683	0.851314	0.859983	0.860207	1.04686	1.18166	0.696867
	329.252	339.145	331.386	345.05	293.057	320.75				1.10076	1.13384	1.1079	1.15358	0.979754	1.07234
	244.437	329.059	285.598	306.258	410.819	335.936				0.817207	1.10012	0.954817	1.02389	1.37346	1.12311
	391.958	320.836	316.005	323.112	348.304	227.564				1.3104	1.07263	1.05647	1.08023	1.16446	0.760796
		301.638	220.501	248.721	308.369	306.792					1.00844	0.737183	0.831529	1.03095	1.02567
		337.096	261.428	356.098		266.893					1.12699	0.874011	1.19051		0.892282
		268.092	305.936	263.51		300.855					0.896291	1.02281	0.880972		1.00582
		321.654	309.67	292.018		323.959					1.07536	1.03529	0.97628		1.08307
		266.676	347.783	325.033		294.656					0.891557	1.16272	1.08666		0.9851
		291.629	267.195	312.902		253.387					0.97498	0.893292	1.0461		0.847128
		193.961	302.695	388.322		316.022					0.648454	1.01198	1.29825		1.05653
		246.736	324.769	266.883		342.974					0.824893	1.08577	0.892249		1.14664
		221.269		262.916		321.027					0.739751		0.878986		1.07326
						284.091									0.949779
						204.217									0.682742
	average:
	299.113	301.971	296.264	296.408	323.121	302.651	306.192
