# Supplementary material for: Neuronal detection triggers systemic digestive shutdown in response to adverse food sources in Caenorhabditis elegans
Source: eLife. 2025 Oct 3;14:RP104028. doi: 10.7554/eLife.104028 (PMC12494379; doi:10.7554/eLife.104028)
Supplement: Figure 4—figure supplement 3—source data 1. [file elife-104028-fig4-figsupp3-data1.xlsx]

## Sheet: Sheet1
Original worm length	WT Control RNAi	WT str-130 RNAi	nsy-1(ag3) Control RNAi	nsy-1(ag3) str-130 RNAi		Relative worm length	WT Control RNAi	WT str-130 RNAi	nsy-1(ag3) Control RNAi	nsy-1(ag3) str-130 RNAi
	n=46	n=43	n=48	n=36			n=46	n=43	n=48	n=36		t` test	P value	P value summary	Significantly different (P < 0.05)
	135.969	135.58	298.871	301.338			1.0201	1.01718	2.24227	2.26077		WT str-130 RNAi vs WT Control RNAi	<0.0001	****	yes
	130.681	158.908	242.228	329.07			0.980428	1.1922	1.8173	2.46883		nsy-1(ag3) str-130 RNAi vs nsy-1(ag3) Control RNAi	0.7161	ns	no
	122.066	134.423	303.463	346.963			0.915794	1.0085	2.27672	2.60307
	127.317	121.241	203.01	450.619			0.95519	0.909605	1.52307	3.38075
	124.681	137.983	170.74	409.176			0.935413	1.03521	1.28097	3.06982
	165.699	135.301	123.621	409.809			1.24315	1.01509	0.927461	3.07457
	107.914	179.015	165.562	273.226			0.80962	1.34305	1.24212	2.04986
	122.205	171.683	194.873	299.603			0.916837	1.28804	1.46203	2.24776
	134.032	133.059	231.647	457.388			1.00557	0.998269	1.73792	3.43153
	101.023	173.705	322.067	195.893			0.75792	1.30321	2.41629	1.46968
	153.32	102.007	245.316	336.731			1.15028	0.765303	1.84047	2.52631
	147.26	110.123	187.251	284.076			1.10481	0.826192	1.40484	2.13127
	120.414	135.291	169.612	435.688			0.9034	1.01501	1.27251	3.26873
	134.692	164.931	389.744	331.603			1.01052	1.23739	2.92404	2.48784
	124.58	182.135	278.525	231.727			0.934655	1.36646	2.08962	1.73852
	123.019	130.976	198.737	330.941			0.922944	0.982641	1.49101	2.48287
	115.85	130.719	252.724	386.789			0.869159	0.980713	1.89605	2.90187
	129.704	159.767	243.722	417.44			0.973098	1.19864	1.82851	3.13182
	146.547	160.688	237.168	321.115			1.09946	1.20555	1.77934	2.40915
	144.156	202.866	398.556	224.36			1.08152	1.52199	2.99015	1.68325
	151.435	157.545	217.264	358.17			1.13613	1.18197	1.63001	2.68715
	150.046	174.813	340.246	300.917			1.12571	1.31153	2.55268	2.25762
	133.523	130.607	276.047	310.818			1.00175	0.979873	2.07103	2.3319
	113.724	164.031	319.467	302.051			0.853209	1.23063	2.39679	2.26612
	121.838	167.169	241.627	248.816			0.914084	1.25418	1.81279	1.86673
	159.423	199.91	293.582	226.955			1.19606	1.49982	2.20258	1.70272
	166.575	162.106	364.249	299.197			1.24972	1.21619	2.73276	2.24471
	149.878	166.915	352.354	178.772			1.12445	1.25227	2.64352	1.34123
	158.877	196.74	346.033	197.802			1.19197	1.47603	2.5961	1.484
	125.585	205.291	323.071	204.901			0.942195	1.54019	2.42382	1.53726
	129.207	119.812	341.408	200.406			0.969369	0.898884	2.5614	1.50354
	108.103	171.14	430.586	245.577			0.811038	1.28397	3.23045	1.84243
	153.269	193.486	461.609	194.681			1.14989	1.45162	3.4632	1.46058
	127.143	187.131	396.511	241.838			0.953884	1.40394	2.9748	1.81438
	139.439	144.51	330.257	158.411			1.04613	1.08418	2.47774	1.18847
	123.212	139.583	362.648	171.461			0.924392	1.04721	2.72075	1.28638
	138.681	168.934	375.99				1.04045	1.26742	2.82085
	138.082	168.831	330.37				1.03595	1.26665	2.47858
	111.073	134.093	446.685				0.83332	1.00603	3.35123
	150.427	182.763	304.975				1.12857	1.37117	2.28806
	117.744	189.321	340.452				0.883369	1.42037	2.55422
	149.883	165.321	463.092				1.12449	1.24031	3.47433
	110.588	162.914	321.916				0.829681	1.22225	2.41516
	119.248		300.009				0.894652		2.2508
	118.367		398.796				0.888043		2.99195
	154.83		332.675				1.1616		2.49588
			302.97						2.27302
			300.189						2.25215
	average:
	133.29	158.45	301.511	294.842
