# Supplementary material for: Neuronal detection triggers systemic digestive shutdown in response to adverse food sources in Caenorhabditis elegans
Source: eLife. 2025 Oct 3;14:RP104028. doi: 10.7554/eLife.104028 (PMC12494379; doi:10.7554/eLife.104028)
Supplement: Figure 5—figure supplement 2—source data 1. [file elife-104028-fig5-figsupp2-data1.xlsx]

## Sheet: Sheet1
Original worm length	Control RNAi	ins-22 RNAi	ins-23 RNAi	ins-24 RNAi	ins-27 RNAi		Relative worm length	Control RNAi	ins-22 RNAi	ins-23 RNAi	ins-24 RNAi	ins-27 RNAi
	n=34	n=35	n=36	n=34	n=33			n=34	n=35	n=36	n=34	n=33		t` test	P value	P value summary	Significantly different (P < 0.05)
	237.949	261.454	168.604	348.704	330.901			0.885271	0.97272	0.627279	1.29733	1.23109		ins-22 RNAi vs Control RNAi	0.5112	ns	no
	384.693	190.336	146.471	259.102	304.772			1.43122	0.708131	0.544934	0.96397	1.13388		ins-23 RNAi vs Control RNAi	<0.0001	****	yes
	184.035	178.407	135.775	317.814	305.099			0.684688	0.66375	0.505141	1.1824	1.1351		ins-24 RNAi vs Control RNAi	0.1478	ns	no
	313.809	341.148	142.929	249.544	184.486			1.1675	1.26922	0.531757	0.92841	0.686366		ins-27 RNAi vs Control RNAi	0.203	ns	no
	179.622	180.135	193.339	295.995	319.486			0.66827	0.670179	0.719303	1.10123	1.18862
	249.237	321.438	153.48	345.934	215.587			0.927268	1.19589	0.571011	1.28702	0.802075
	244.818	231.818	202.948	236.002	341.745			0.910827	0.862462	0.755053	0.878028	1.27144
	404.404	205.977	200.857	232.566	238.599			1.50455	0.766322	0.747273	0.865244	0.88769
	218.307	254.596	182.732	285.513	244.12			0.812195	0.947205	0.679841	1.06223	0.90823
	198.572	287.321	165.07	381.633	314.489			0.738772	1.06896	0.614131	1.41984	1.17003
	231.844	351.779	257.954	232.677	218.896			0.862558	1.30877	0.959699	0.865657	0.814386
	188.412	195.823	229.383	270.41	363.897			0.700973	0.728545	0.853402	1.00604	1.35385
	339.397	266.941	126.874	300.618	161.278			1.2627	0.993134	0.472025	1.11843	0.600023
	228.742	264.868	221.21	303.087	203.079			0.851018	0.985422	0.822995	1.12761	0.75554
	188.697	262.017	138.182	330.883	318.808			0.702033	0.974815	0.514096	1.23103	1.1861
	308.308	203.542	158.985	286.544	167.088			1.14704	0.757263	0.591492	1.06607	0.621638
	192.284	236.816	305.237	345.773	255.405			0.715378	0.881056	1.13561	1.28642	0.950215
	301.429	298.488	286.904	274.295	232.327			1.12144	1.1105	1.0674	1.02049	0.864355
	201.187	299.395	208.903	335.447	200.435			0.748501	1.11388	0.777208	1.24801	0.745703
	167.664	208.212	307.639	305.208	240.25			0.623781	0.774637	1.14455	1.1355	0.893832
	235.002	210.051	196.954	299.347	171.513			0.874307	0.781479	0.732753	1.1137	0.638101
	324.398	177.243	183.138	197.544	226.801			1.2069	0.659419	0.681351	0.734948	0.843796
	182.262	321.019	330.928	382.44	156.025			0.678092	1.19433	1.23119	1.42284	0.580479
	320.715	267.151	176.981	381.301	200.229			1.1932	0.993915	0.658445	1.4186	0.744937
	307.884	203.274	163.346	279.004	240.329			1.14546	0.756266	0.607717	1.03801	0.894126
	322.98	201.767	179.395	191.316	302.081			1.20162	0.750659	0.667426	0.711777	1.12387
	322.004	336.443	201.617	315.701	241.414			1.19799	1.25171	0.750101	1.17454	0.898163
	405.419	278.699	167.046	303.978	233			1.50833	1.03688	0.621482	1.13093	0.866859
	296.687	264.167	187.529	373.217	253.797			1.1038	0.982814	0.697688	1.38853	0.944233
	218.643	204.993	165.693	229.751	186.39			0.813445	0.762661	0.616448	0.854771	0.69345
	283.515	311.342	176.568	362.794	198.591			1.0548	1.15832	0.656908	1.34975	0.738843
	219.383	302.337	144.531	203.027	287.479			0.816198	1.12482	0.537717	0.755347	1.06954
	265.827	370.742	140.604	192.629	311.149			0.98899	1.37932	0.523107	0.716662	1.15761
	470.611	320.443	161.346	295.61				1.75087	1.19218	0.600276	1.09979
		228.224	198.179						0.84909	0.73731
			191.251							0.711535
	average:
	268.786	258.24	191.627	292.512	247.562
