# Supplementary material for: Neuronal detection triggers systemic digestive shutdown in response to adverse food sources in Caenorhabditis elegans
Source: eLife. 2025 Oct 3;14:RP104028. doi: 10.7554/eLife.104028 (PMC12494379; doi:10.7554/eLife.104028)
Supplement: Figure 5—figure supplement 3—source data 1. [file elife-104028-fig5-figsupp3-data1.xlsx]

## Sheet: Figure 5—figure supplement 3B
Original worm length	Control	Transgene		Relative worm length	Control	Transgene
	n=39	n=38			n=39	n=38		t` test	P value	P value summary	Significantly different (P < 0.05)
	164.805	142.924			1.00206	0.869021		Transgene vs Control	<0.0001	****	yes
	156.829	114.81			0.953568	0.69808
	160.188	84.916			0.973992	0.516315
	158.295	122.309			0.962482	0.743676
	107.551	144.267			0.653943	0.877187
	154.517	133.515			0.93951	0.811812
	165.028	103.188			1.00342	0.627414
	207.262	108.207			1.26022	0.657931
	152.513	99.153			0.927325	0.60288
	172.186	130.517			1.04694	0.793583
	150.216	89.771			0.913359	0.545835
	165.152	117.062			1.00417	0.711773
	131.057	99.401			0.796866	0.604388
	197.381	105.949			1.20014	0.644202
	195.064	155.032			1.18605	0.942642
	162.208	101.888			0.986274	0.61951
	178.734	97.601			1.08676	0.593444
	140.041	115.822			0.851492	0.704233
	203.307	113.223			1.23617	0.68843
	129.484	84.922			0.787302	0.516352
	173.218	98.18			1.05322	0.596964
	155.988	122.258			0.948454	0.743366
	157.046	165.877			0.954887	1.00858
	184.172	136.599			1.11982	0.830563
	181.897	124.279			1.10599	0.755654
	151.739	122.85			0.922619	0.746965
	127.514	99.287			0.775324	0.603695
	162.634	92.806			0.988864	0.564289
	164.481	136.289			1.00009	0.828679
	151.657	148.949			0.922121	0.905655
	172.118	81.185			1.04653	0.493629
	153.698	126.122			0.934531	0.76686
	145.881	111.133			0.887001	0.675722
	170.507	84.019			1.03673	0.510861
	170.304	135.627			1.0355	0.824653
	185.865	111.486			1.13012	0.677869
	223.863	92.42			1.36116	0.561942
	174.468	134.969			1.06082	0.820653
	155.285				0.94418
	average:
	164.465	115.495

## Sheet: Figure 5—figure supplement 3C
Original worm length	Control RNAi	pmk-1 RNAi		Relative worm length	Control RNAi	pmk-1 RNAi
	n=25	n=24			n=25	n=24		t` test	P value	P value summary	Significantly different (P < 0.05)
	6.31	8.269			0.935458	1.22588		pmk-1 RNAi vs Control RNAi	0.4207	ns	no
	4.406	7.927			0.65319	1.17518
	7.394	5.345			1.09616	0.792397
	4.718	5.802			0.699444	0.860147
	5.886	9.394			0.8726	1.39266
	5.88	8.534			0.87171	1.26517
	11.278	5.918			1.67196	0.877344
	8.228	6.944			1.2198	1.02945
	5.516	13.87			0.817747	2.05623
	4.386	11.148			0.650225	1.65269
	8.612	5.77			1.27673	0.855403
	5.848	6.619			0.866966	0.981267
	5.178	6.365			0.767639	0.943612
	5.442	5.9			0.806777	0.874675
	6.179	6.471			0.916037	0.959326
	8.823	10.709			1.30801	1.58761
	5.907	5.268			0.875713	0.780981
	8.934	8.388			1.32447	1.24352
	5.42	9.155			0.803515	1.35723
	6.455	4.681			0.956954	0.693959
	6.489	5.468			0.961995	0.810631
	6.365	5.658			0.943612	0.838799
	9.757	5.186			1.44648	0.768825
	9.413	4.687			1.39548	0.694848
	5.81				0.861333
	average:
	6.74536	7.22817
