# Supplementary material for: Neuronal detection triggers systemic digestive shutdown in response to adverse food sources in Caenorhabditis elegans
Source: eLife. 2025 Oct 3;14:RP104028. doi: 10.7554/eLife.104028 (PMC12494379; doi:10.7554/eLife.104028)
Supplement: Figure 5—source data 1. [file elife-104028-fig5-data1.xlsx]

## Sheet: Figure 5B
308 genes can utilize SS
ID	Public Name	nsyss1	nsyss2	nsyss3	meanbase	WT ss1	WT ss2	WT ss3	meanbase	FoldChange	Log2FC	P-value
WBGene00002106	ins-23	1.79943	2.20374	1.14871	1.7173	0.184526	0.362411	0	0.182312	9.41953	3.23566	0.0091155
WBGene00000008	aat-7	0.551257	0.607605	0.980318	0.71306	0.218043	0.142746	0.0987578	0.153182	4.65498	2.21878	0.0157791
WBGene00000108	alh-2	0.288514	0.318005	0.379872	0.328797	0.0665688	0.0980562	0.120604	0.0950762	3.45824	1.79004	0.00168777
WBGene00000544	clp-3	0.565345	0.453188	0.639782	0.552772	0.308318	0.20961	0.21484	0.244256	2.26308	1.17829	0.00806182
WBGene00000557	cnc-3	17.4458	22.6311	19.0185	19.6984	8.42209	9.48677	9.6487	9.18585	2.14443	1.10059	0.00266528
WBGene00000602	col-13	2.92484	2.33212	2.74113	2.66603	0.918944	0.789605	1.19662	0.96839	2.75306	1.46103	0.00132794
WBGene00000677	col-103	1719.6	1665.03	1550.01	1644.88	538.348	526.916	541.545	535.603	3.07108	1.61875	2.47835e-05
WBGene00000734	col-161	0.694765	0.765782	0.846723	0.76909	0.641214	0.228972	0.211217	0.360468	2.13359	1.09328	0.0499916
WBGene00000757	col-184	1.11774	2.26946	1.68996	1.69239	0.54294	0.799753	0.737738	0.693477	2.44043	1.28714	0.0429731
WBGene00001104	dsl-2	0.288972	0.445913	0.166025	0.300303	0	0	0.048318	0.016106	18.6454	4.22075	0.0262591
WBGene00001123	dyf-7	1.34649	1.34278	1.53494	1.40807	0.295882	0.261501	0.562855	0.373413	3.77081	1.91487	0.000829123
WBGene00001399	fat-7	7.35825	6.14072	6.44205	6.64701	2.08583	1.14323	1.23035	1.48647	4.47167	2.16081	0.000403353
WBGene00001736	grl-27	0.233918	0.257829	0.111996	0.201248	0	0	0.0977819	0.032594	6.17439	2.6263	0.0388419
WBGene00001765	gst-17	1.89243	2.46511	3.13003	2.49586	0.714502	0.701644	0.791067	0.735738	3.39232	1.76227	0.00800261
WBGene00001766	gst-18	2.98896	2.52577	4.48399	3.3329	1.10343	0.632083	1.41603	1.05051	3.17264	1.66569	0.0226754
WBGene00001905	his-31	1.7818	1.26253	1.58432	1.54289	0.587309	0.692087	0.532018	0.603805	2.55527	1.35348	0.00406034
WBGene00002013	hsp-12.6	6.75343	6.4643	5.9563	6.39134	2.7884	2.89928	3.41737	3.03502	2.10587	1.07441	0.000378148
WBGene00002026	hsp-70	6.42655	5.76121	7.35725	6.515	3.16331	2.58865	2.00585	2.58593	2.5194	1.33308	0.00233524
WBGene00002105	ins-22	8.01225	4.81704	6.27729	6.36886	3.19315	1.98043	3.50149	2.89169	2.20247	1.13912	0.0281996
WBGene00003093	lys-4	482.321	548.814	591.3	540.812	234.992	251.344	245.534	243.957	2.21683	1.1485	0.000757588
WBGene00003094	lys-5	6.11343	9.63954	8.8623	8.20509	1.25382	1.30821	1.5617	1.37458	5.96916	2.57753	0.00313116
WBGene00003095	lys-6	4.59094	6.44027	6.23449	5.75523	2.23409	1.89128	2.44248	2.18928	2.62882	1.39441	0.00418993
WBGene00003485	mua-6	34.8305	36.2019	34.3764	35.1363	14.663	20.6572	17.2418	17.5207	2.00542	1.0039	0.000638462
WBGene00003541	nas-22	0.244753	0.161863	0.234367	0.213661	0.0451776	0.0887291	0.0409244	0.0582771	3.6663	1.87432	0.00678098
WBGene00003717	nhr-127	0.665707	0.733754	0.701203	0.700221	0.153599	0.211168	0.222622	0.195796	3.57628	1.83846	6.43073e-05
WBGene00003863	old-2	0.0790666	0.130723	0.151423	0.120404	0	0.0358295	0.0330512	0.0229602	5.24403	2.39067	0.0162153
WBGene00004133	abu-13	1.48034	1.41883	1.01692	1.30536	0.564315	0.495826	0.645711	0.568618	2.29568	1.19892	0.00828671
WBGene00004176	srlf-36	3.24435	2.5895	1.82115	2.55167	1.65201	1.01393	0.374122	1.01335	2.51804	1.3323	0.0495959
WBGene00004177	srlf-37	7.02779	5.84358	8.1463	7.00589	3.52752	3.12881	1.75233	2.80289	2.49952	1.32165	0.00795596
WBGene00004512	rrn-1.1	2.19315	2.04543	1.42159	1.88673	0.934203	0.856231	0.73342	0.841285	2.24267	1.16522	0.0127223
WBGene00004824	F56B3.4	246.753	231.214	217.3	231.756	13.5613	14.5255	14.1261	14.071	16.4705	4.04181	1.38817e-05
WBGene00004932	sod-3	7.2467	7.83082	10.6809	8.58613	3.40964	3.73461	2.91045	3.35157	2.56183	1.35717	0.00856691
WBGene00004989	spp-4	11.7076	11.4863	11.2108	11.4682	3.79963	3.61465	2.90412	3.43947	3.3343	1.73738	1.29458e-05
WBGene00005002	spp-17	51.8435	71.3845	71.0284	64.7521	16.7834	19.3728	16.9371	17.6978	3.65877	1.87136	0.00194286
WBGene00005116	srd-38	0.12291	0.135474	0.176542	0.144975	0	0.0556976	0	0.0185659	7.80871	2.96508	0.00683378
WBGene00005122	srd-44	0.062035	0.136752	0.118805	0.105864	0	0.056223	0	0.018741	5.64879	2.49794	0.0409901
WBGene00005142	srd-65	0.636359	0.573877	0.775542	0.661926	0.266959	0.419447	0.290191	0.325532	2.03336	1.02387	0.0115454
WBGene00005250	srh-27	0.604452	0.242268	0.420947	0.422556	0.152144	0.049802	0.137821	0.113256	3.73099	1.89956	0.0474062
WBGene00005392	srh-177	0.419726	0.19827	0.229665	0.282554	0.110678	0	0.0501293	0.0536025	5.27127	2.39815	0.0397973
WBGene00005402	srh-187	0.348126	0.319758	0.166676	0.278187	0.107098	0	0	0.0356992	7.79253	2.96209	0.0220623
WBGene00005426	srh-216	0.167022	0.184094	0.266557	0.205891	0	0	0.139636	0.0465453	4.42345	2.14517	0.0460715
WBGene00005556	sri-44	0.553097	0.338685	0.353084	0.414955	0.226873	0.22279	0.154136	0.201266	2.06172	1.04385	0.0431175
WBGene00005582	sri-70	0.968202	1.13387	0.98506	1.02904	0.446787	0.65812	0.303544	0.469484	2.19186	1.13216	0.00841162
WBGene00005699	sru-36	0.295022	0.325178	0.452003	0.357401	0	0.160429	0.197319	0.119249	2.99709	1.58356	0.0369592
WBGene00005850	srw-103	0.694993	1.00174	0.665501	0.78741	0.296042	0.339166	0.491648	0.375619	2.0963	1.06785	0.0284719
WBGene00005859	srw-112	0.104932	0.231315	0.301436	0.212561	0	0	0.0877263	0.0292421	7.26899	2.86176	0.0467757
WBGene00006221	str-177	0.283436	0.187445	0.217126	0.229335	0.156953	0.0513762	0.0473924	0.0852406	2.69045	1.42785	0.0345034
WBGene00006429	arrd-3	0.642641	0.386361	0.447541	0.492181	0.161756	0.317691	0.195371	0.224939	2.18806	1.12965	0.0420418
WBGene00006534	tba-8	1.16929	0.831494	1.33638	1.11239	0.313306	0.717892	0.315345	0.448848	2.47833	1.30937	0.0296112
WBGene00006886	vap-1	39.4917	36.5424	38.7496	38.2613	15.4721	18.0149	14.7053	16.0641	2.38178	1.25204	7.68704e-05
WBGene00007132	pals-27	2.11513	2.37796	2.1874	2.22683	1.24934	0.996823	0.530496	0.925554	2.40594	1.2666	0.00441699
WBGene00007442	C08E8.6	0.986356	1.81196	2.20383	1.66738	0.303443	0.297982	0.549752	0.383726	4.34525	2.11944	0.0252274
WBGene00007454	C08F11.7	0.805189	1.33124	0.963774	1.0334	0.495417	0.608126	0.336583	0.480042	2.15273	1.10617	0.033866
WBGene00007605	hrg-7	466.64	545.466	548.565	520.224	230.553	252.112	251.451	244.705	2.12592	1.08809	0.00057585
WBGene00007729	clec-185	1.54219	1.69982	1.21831	1.48677	0.49816	0.69885	0.773592	0.656867	2.26343	1.17851	0.00715734
WBGene00007834	srxa-7	0.41719	0.394143	0.513625	0.441653	0.0550048	0.324089	0.149479	0.176191	2.50667	1.32577	0.0378497
WBGene00007853	C31G12.4	0.175743	0.242133	0.231392	0.216423	0.0202746	0.0995485	0.0183659	0.046063	4.6984	2.23217	0.00723994
WBGene00007861	C32A9.1	2.75106	3.10622	2.82707	2.89479	1.98167	1.15544	0.785359	1.30749	2.214	1.14666	0.0127147
WBGene00007868	srlf-4	1.13956	0.669892	0.654723	0.821393	0.280461	0.275413	0	0.185291	4.43298	2.14828	0.0259552
WBGene00007885	ugt-21	10.4892	9.048	10.7159	10.0844	4.7594	3.91068	3.72475	4.13161	2.44078	1.28734	0.000624474
WBGene00008074	nkb-2	0.242348	0.160272	0.185651	0.19609	0.0447336	0	0.121567	0.0554334	3.5374	1.82269	0.0307519
WBGene00008153	C47E12.10	1.51262	0.694683	1.14668	1.11799	0.349008	0.285606	0.57961	0.404741	2.76224	1.46584	0.0477915
WBGene00008247	srsx-26	1.08875	1.28576	1.71276	1.36242	0.502415	0.563855	0.3901	0.485457	2.80647	1.48876	0.0101078
WBGene00008351	cTel7X.1	0.319037	0.351648	0.152749	0.274478	0	0.144573	0	0.0481912	5.69561	2.50985	0.0444006
WBGene00008357	nspc-16	32.6197	30.4752	29.8967	30.9972	16.4863	14.5002	11.5578	14.1814	2.18576	1.12814	0.000527073
WBGene00008358	nspc-18	52.7743	48.5049	52.6336	51.3043	20.2295	22.9217	19.3118	20.821	2.46406	1.30104	6.67502e-05
WBGene00008447	E01G4.5	144.94	143.651	143.813	144.135	36.6532	35.6792	33.0576	35.13	4.10289	2.03664	7.36805e-08
WBGene00008813	srz-2	1.24405	1.11003	0.623993	0.992693	0.328046	0.322143	0.148582	0.266257	3.72833	1.89853	0.0211857
WBGene00008872	F15H10.5	0.454243	0.429149	0.372829	0.41874	0.11978	0.117624	0.0542518	0.0972188	4.30719	2.10675	0.000570042
WBGene00008912	F17C8.7	1.59618	1.75933	2.29266	1.88273	1.24651	0.667677	0.66723	0.860472	2.18801	1.12962	0.0231452
WBGene00008982	srsx-2	0.317156	0.209745	0.242958	0.25662	0.117084	0	0.106061	0.0743818	3.45003	1.78661	0.0204952
WBGene00009130	F25H5.8	1.2773	0.938571	1.83464	1.35017	0.392948	0.192938	0.355954	0.313947	4.30063	2.10455	0.0181256
WBGene00009215	thn-2	12.3817	12.2663	12.8442	12.4974	3.87712	5.34364	4.12827	4.44968	2.80861	1.48986	7.79206e-05
WBGene00009747	F46A8.4	6.75343	4.30954	4.67995	5.24764	0.49207	1.28857	0.520035	0.766892	6.84274	2.77457	0.00507962
WBGene00009748	F46A8.5	3.69347	3.12426	3.37223	3.39665	0.39637	0.778472	1.00535	0.726731	4.67388	2.22462	0.000385741
WBGene00009749	F46A8.6	1.51021	1.04036	1.44612	1.33223	0.261338	0.17109	0.552382	0.32827	4.05834	2.02089	0.00578389
WBGene00009751	F46A8.8	2.41387	2.8441	3.74611	3.00136	1.07549	0.678946	0.974243	0.909561	3.29979	1.72237	0.00698346
WBGene00009807	pepm-1	1.86339	1.47878	2.71216	2.01811	0.481534	1.08084	0.934716	0.832364	2.42456	1.27772	0.043398
WBGene00009959	F53B6.4	0.365317	0.345136	0.249867	0.320107	0.0963311	0.0945975	0.174524	0.121818	2.62775	1.39383	0.0110193
WBGene00010034	F54B11.11	3.17448	3.64178	3.443	3.41975	1.4649	1.46789	1.70613	1.5463	2.21157	1.14507	0.000284135
WBGene00010102	F55C9.5	0.817422	1.80195	1.25237	1.29058	0.301767	0.444503	0.273357	0.339876	3.79722	1.92494	0.0304622
WBGene00010147	F56D5.2	0.25205	0.166688	0.193083	0.203941	0	0.0913744	0.084289	0.0585545	3.48292	1.8003	0.019838
WBGene00010187	F57B1.1	1.79493	1.52619	1.37501	1.56538	0.6153	0.92958	0.600249	0.715043	2.18921	1.13041	0.00645671
WBGene00010203	F57E7.2	0.571801	0.840331	0.912559	0.774897	0.263863	0.172743	0.159348	0.198652	3.90078	1.96376	0.00609052
WBGene00010396	H13N06.2	1.40205	1.3827	1.6252	1.46998	0.681044	0.434712	0.370157	0.495304	2.96784	1.56941	0.00135503
WBGene00010402	H16D19.4	3.20276	3.22316	3.46687	3.2976	1.15665	1.51445	1.2806	1.31723	2.50343	1.3239	0.000125335
WBGene00010473	hrg-2	16.8905	18.617	15.4947	17.0008	5.89036	5.72593	4.47347	5.36325	3.16986	1.66442	0.000321197
WBGene00010516	K02E11.7	26.6439	26.39	24.3375	25.7905	8.72556	10.6828	9.23856	9.54899	2.70086	1.43342	6.48004e-05
WBGene00010600	nhr-196	0.404956	0.446349	0.553958	0.468421	0	0.314585	0.0483652	0.120983	3.87178	1.953	0.0318354
WBGene00010753	K10G4.4	0.232949	0.202706	0.281765	0.23914	0.158416	0.111118	0.0820015	0.117179	2.04081	1.02914	0.0189866
WBGene00011200	R10E4.3	0.451274	0.710574	0.740784	0.634211	0.178496	0.233711	0.431178	0.281128	2.25595	1.17373	0.0419686
WBGene00011241	mpz-5	0.381405	0.14013	0.24348	0.255005	0	0	0.0531446	0.0177149	14.395	3.84749	0.0301812
WBGene00011244	R11D1.3	22.6387	19.8443	19.8857	20.7895	7.32102	8.07782	5.29053	6.89646	3.01452	1.59193	0.000365861
WBGene00011351	T01H3.5	1.58345	1.85438	2.65344	2.03042	1.18739	0.717549	0.413693	0.772876	2.6271	1.39347	0.0326952
WBGene00011448	tag-348	1.98856	1.95359	2.06976	2.00397	0.837848	0.940308	1.19267	0.990275	2.02365	1.01696	0.000795092
WBGene00011484	srlf-24	8.51656	9.19552	7.4062	8.37276	3.36862	3.62304	3.05148	3.34771	2.50104	1.32253	0.000780294
WBGene00011554	T07A5.1	0.810704	1.52433	1.23295	1.18933	0.484139	0.302544	0.438561	0.408415	2.91205	1.54204	0.0218599
WBGene00011665	T09F5.1	0.256641	0.169724	0.34405	0.256805	0.0947437	0.0930386	0.128736	0.105506	2.43403	1.28335	0.0428407
WBGene00011874	T20G5.13	0.828871	0.822236	0.555588	0.735565	0.382491	0.300486	0.415778	0.366252	2.00836	1.00602	0.0185433
WBGene00011876	srz-6	0.360862	0.46404	0.691097	0.505333	0.277539	0.109018	0.0502822	0.145613	3.47038	1.79509	0.0390201
WBGene00011903	T21E8.5	0.797055	1.09816	0.954039	0.949752	0	0.541785	0.333183	0.291656	3.25641	1.70328	0.0217109
WBGene00011919	T22C1.9	0.196834	0.144636	0.125654	0.155708	0	0	0.0548533	0.0182844	8.51587	3.09015	0.00805528
WBGene00012044	T26E4.2	1.09595	1.55311	1.34928	1.33278	0.577987	0.425689	0.916253	0.639976	2.08255	1.05835	0.0242111
WBGene00012058	T26F2.2	0.377352	0.831847	0.722677	0.643959	0.232177	0.113999	0	0.115392	5.58061	2.48042	0.0256757
WBGene00012374	W09H1.4	2.79283	2.34537	2.16492	2.43437	0.859187	1.32585	0.889486	1.02484	2.37537	1.24815	0.00419379
WBGene00012452	Y17D7B.4	155.478	144.626	157.057	152.387	82.0857	72.1797	71.0358	75.1004	2.02911	1.02085	0.000124016
WBGene00012591	nspe-1	3.99171	5.54748	3.48994	4.34304	1.60175	2.67397	1.59605	1.95726	2.21894	1.14987	0.0289974
WBGene00012680	Y39B6A.21	1.9461	2.14502	2.77138	2.2875	1.47372	0.768824	1.04295	1.09517	2.08873	1.06262	0.0208593
WBGene00012683	asp-17	0.703344	0.609115	0.529176	0.613878	0	0.182128	0	0.0607094	10.1118	3.33796	0.00217529
WBGene00012780	Y42A5A.5	1.68652	2.19689	1.90857	1.93066	0.566008	0.555821	1.2818	0.801211	2.40968	1.26884	0.0160801
WBGene00012818	Y43F8B.7	15.4317	16.483	16.3002	16.0717	4.55164	4.7581	4.12314	4.47763	3.58932	1.84371	6.47596e-06
WBGene00012864	Y45F3A.9	8.28651	6.17131	7.50595	7.32126	1.65358	3.04466	2.38728	2.36184	3.09981	1.63218	0.0025372
WBGene00012910	Y46G5A.20	3.48747	5.47472	6.67896	5.21372	2.73099	2.10716	2.03212	2.29009	2.27665	1.18691	0.0377843
WBGene00012939	subs-4	1.12955	0.943185	1.47493	1.18255	0.252723	0.403284	0.744025	0.466677	2.53398	1.34141	0.0282956
WBGene00013101	Y51H4A.5	6.51332	6.5602	7.15095	6.74149	2.95382	3.35866	3.5207	3.27773	2.05676	1.04037	0.000199385
WBGene00013181	Y53H1B.2	172.502	149.013	168.896	163.47	84.5425	85.3408	74.2489	81.3774	2.00879	1.00633	0.000541218
WBGene00013304	ptp-5.2	0.799234	1.13262	0.619543	0.850467	0.351252	0.44841	0.381821	0.393828	2.15949	1.11069	0.0405744
WBGene00013310	Y57G11C.14	0.287637	0.158519	0.206573	0.217577	0	0.0651722	0.0601186	0.0417636	5.20972	2.3812	0.0151102
WBGene00013495	clec-236	0.0675972	0.0372534	0.0647287	0.0565264	0.0311935	0	0	0.0103978	5.43637	2.44264	0.0314259
WBGene00013512	nhr-276	0.173552	0.127528	0.110792	0.137291	0.0533917	0	0.0483652	0.033919	4.04761	2.01707	0.0150935
WBGene00013553	Y75B8A.18	3.8327	4.72146	3.13034	3.89483	1.56056	1.94114	2.07335	1.85835	2.09585	1.06754	0.0137409
WBGene00013556	Y75B8A.23	1.6624	0.732929	1.27348	1.22294	0.306852	0.30133	0.277964	0.295382	4.14018	2.04969	0.0262967
WBGene00013613	Y102A5C.4	0.260056	0.24569	0.24902	0.251589	0.102862	0.134681	0.0621188	0.0998873	2.51873	1.33269	0.00210692
WBGene00013637	Y105C5A.13	24.6589	26.5	29.8107	26.9899	15.6463	6.14588	14.8175	12.2032	2.2117	1.14516	0.0120623
WBGene00013801	Y116A8C.24	0.106314	0.117181	0.101802	0.108432	0.0654129	0.0642356	0.0296273	0.0530919	2.04235	1.03023	0.0117422
WBGene00013843	fbxa-49	0.941379	0.899257	1.02162	0.954086	0.231685	0.170637	0.524683	0.309002	3.08764	1.6265	0.0049641
WBGene00013935	ZK218.1	6.09795	6.63509	4.94084	5.89129	2.5975	2.4799	3.26801	2.7818	2.1178	1.08256	0.00504545
WBGene00014046	clec-60	10.7947	12.8374	12.1047	11.9123	1.17979	1.15855	2.2166	1.51831	7.84572	2.97191	0.000114507
WBGene00014049	ZK666.11	1.35186	0.49668	1.29449	1.04768	0.138629	0	0.125578	0.0880688	11.8961	3.57242	0.0264589
WBGene00014116	ZK858.2	0.138598	0.30553	0.265433	0.23652	0.0639575	0.0628065	0.115873	0.0808789	2.92438	1.54813	0.0431622
WBGene00014161	arrd-5	0.988959	1.03268	1.49525	1.17229	0.288231	0.707609	0.565707	0.520516	2.25218	1.17132	0.0327984
WBGene00014162	chil-9	0.119077	0.0874993	0.076016	0.0941975	0.036633	0	0.0331842	0.0232724	4.04761	2.01707	0.0150935
WBGene00014196	ZK1053.1	2.19393	2.90183	1.89075	2.32884	1.06303	0.745645	0.779536	0.862739	2.69935	1.43261	0.00973886
WBGene00014760	F46A8.2	2.93461	3.41428	2.18562	2.84484	1.20374	0.591039	1.15857	0.984449	2.88978	1.53096	0.0103637
WBGene00014925	Y57G11C.29	0.113447	0.041681	0.0724216	0.0758498	0	0	0.0316151	0.0105384	7.19749	2.84749	0.0486976
WBGene00014991	ZK829.12	0.224512	0.197969	0.257982	0.226821	0.0828828	0.122087	0.11262	0.105863	2.14259	1.09935	0.00450626
WBGene00015117	B0294.1	76.4544	60.445	67.6966	68.1987	30.4024	32.1649	29.9864	30.8513	2.21056	1.14441	0.00133234
WBGene00015118	B0294.3	19.4412	15.4411	12.5933	15.8252	2.37477	6.47787	3.58534	4.14599	3.81699	1.93244	0.0074179
WBGene00015225	B0507.8	2.8292	2.4027	2.35385	2.52858	1.24136	1.26105	1.20204	1.23482	2.04774	1.03403	0.00104416
WBGene00015252	B0546.5	0.798207	0.879797	1.25569	0.977899	0.420961	0.516732	0.381331	0.439675	2.22414	1.15325	0.0213183
WBGene00015342	C02E7.10	9.14621	12.2555	12.7078	11.3698	2.81374	0.975214	4.1981	2.66235	4.27059	2.09444	0.00394479
WBGene00015351	C02F5.10	0.562561	0.620064	0.969638	0.717421	0.10384	0.203942	0.376256	0.228013	3.14641	1.65371	0.031018
WBGene00015426	C04E6.12	0.688155	0.758497	0.658953	0.701868	0.404163	0.396889	0.209208	0.336753	2.08422	1.05951	0.00654936
WBGene00015593	C08E3.1	4.7445	5.22947	6.45607	5.47668	2.53509	2.48947	1.2526	2.09239	2.61743	1.38815	0.00685737
WBGene00015605	C08E3.13	208.562	233.656	242.533	228.25	115.211	87.2675	81.4551	94.6445	2.41166	1.27003	0.000783466
WBGene00015706	C12D5.3	19.1667	15.937	16.7434	17.2824	7.44815	6.78078	5.06021	6.42971	2.68789	1.42648	0.000836893
WBGene00015710	C12D5.9	6.96845	7.51378	8.89699	7.79307	3.26227	4.43922	2.61742	3.43964	2.26567	1.17994	0.00513552
WBGene00015829	math-15	1.93749	1.87668	1.34928	1.72115	1.1921	0.638533	0.638104	0.822912	2.09154	1.06456	0.0267634
WBGene00015998	srt-59	0.478717	0.263825	0.515702	0.419415	0.0552272	0.108467	0.0500279	0.0712406	5.8873	2.55761	0.0125096
WBGene00016042		0.303494	0.334516	0.58123	0.406414	0	0.13753	0.126866	0.088132	4.61142	2.20521	0.0317826
WBGene00016047	srt-26	0.260138	0.430093	0.186824	0.292351	0	0	0.054371	0.0181237	16.1309	4.01176	0.0209977
WBGene00016049	srt-28	5.33466	3.85872	3.61836	4.27058	1.89759	1.10799	0.8827	1.29609	3.29497	1.72026	0.00859101
WBGene00016254	fbxb-114	1.1713	2.24231	1.7119	1.7085	0.739642	0.838074	0.463853	0.680523	2.51057	1.32802	0.0353183
WBGene00016285	C31B8.12	0.868811	0.337983	0.44044	0.549078	0.0943346	0.0463184	0.0854536	0.0753689	7.28521	2.86497	0.0440389
WBGene00016303	fbxc-32	1.9308	0.940352	1.4619	1.44435	0.704503	0.244173	0.563099	0.503925	2.8662	1.51914	0.041204
WBGene00016497	vps-32.2	0.272307	0.200094	0.260751	0.244384	0.0837726	0.082265	0.151772	0.105936	2.30689	1.20595	0.0124445
WBGene00016543	srsx-14	0.297993	0.197072	0.285347	0.260137	0.11001	0.10803	0.0498264	0.0892886	2.91344	1.54273	0.0102565
WBGene00016627	C44B7.5	0.295537	0.407183	0.424494	0.375738	0.136379	0.0669622	0.18531	0.12955	2.90033	1.53622	0.00971429
WBGene00016698	C46A5.1	0.440556	0.606985	0.808566	0.618703	0.237182	0.0998203	0.214853	0.183952	3.36339	1.74992	0.0192043
WBGene00016720	math-25	0.089873	0.0495298	0.0860591	0.075154	0.0414728	0	0	0.0138243	5.43637	2.44264	0.0314259
WBGene00016833	sre-51	0.336258	0.926572	0.643977	0.635602	0.15517	0.0507924	0.187415	0.131126	4.84727	2.27717	0.0451702
WBGene00016857	srt-16	0.261286	0.143997	0.187649	0.197644	0	0.0592017	0	0.0197339	10.0155	3.32416	0.0107956
WBGene00016861	C50H11.17	0.527977	0.740657	0.597493	0.622042	0.177193	0.130503	0.321023	0.209573	2.96814	1.56956	0.00828747
WBGene00016899	C53C11.1	0.331548	0.365438	0.396848	0.364612	0.229495	0.0751215	0.207889	0.170835	2.13429	1.09376	0.0201237
WBGene00016963	C56C10.6	0.35227	0.388278	0.252991	0.33118	0.203198	0	0.110441	0.104547	3.16777	1.66347	0.0336029
WBGene00017103	klo-2	4.24586	3.65358	4.56498	4.15481	1.61556	1.51898	1.80598	1.64684	2.5229	1.33508	0.000859558
WBGene00017104	E02H9.6	14.2925	12.3103	13.3582	13.3204	4.89721	4.84786	5.25901	5.00136	2.66335	1.41324	0.000143934
WBGene00017135	EEED8.4	0.412127	0.454253	0.236782	0.367721	0.152144	0.074703	0	0.0756157	4.86302	2.28185	0.0215455
WBGene00017140	EEED8.12	0.248661	0.639517	0.555588	0.481255	0.229495	0	0	0.0764982	6.29106	2.6533	0.0457147
WBGene00017225	fbxa-52	5.0669	5.58482	5.04595	5.23256	1.37173	1.0409	1.01666	1.1431	4.57753	2.19457	4.11387e-05
WBGene00017376	F11C7.2	50.5291	43.1057	38.4428	44.0259	22.0395	21.3292	18.8073	20.7254	2.12425	1.08695	0.00310042
WBGene00017499	pud-1.1	1.5574	1.57355	2.48552	1.87216	1.07802	0.705747	0.217007	0.666925	2.80715	1.48911	0.0380577
WBGene00017609	F19G12.1	0.369884	0.407692	0.354187	0.377254	0.113791	0	0.103078	0.0722898	5.21863	2.38367	0.00152979
WBGene00017890	F28B4.1	0.303494	0.111505	0.290615	0.235205	0	0.0916868	0	0.0305623	7.69593	2.9441	0.041471
WBGene00018057	F35F10.7	2.18324	3.17989	3.65853	3.00722	0.935516	1.76669	1.23857	1.31359	2.28931	1.19491	0.0272217
WBGene00018114	srt-41	3.37689	4.416	3.61723	3.80337	0.950827	1.40057	1.10057	1.15066	3.3054	1.72482	0.00146864
WBGene00018240	cox-17	0.737463	0.609633	0.882709	0.743268	0	0.334185	0.154136	0.162774	4.56626	2.19101	0.00962223
WBGene00018345	F42C5.3	1.22868	1.35427	1.50335	1.3621	1.00798	0.12373	0.399473	0.510393	2.66873	1.41615	0.0355383
WBGene00018627	F49D11.3	0.436073	0.343319	0.357915	0.379103	0.287472	0.112919	0.0520817	0.150825	2.51354	1.32972	0.0401017
WBGene00018630	F49D11.6	0.615191	0.610266	0.412359	0.545939	0.340664	0.111511	0.205728	0.219301	2.48945	1.31583	0.0256933
WBGene00018771	duox-2	0.275445	0.260229	0.376795	0.304156	0.0121054	0.0356627	0.0328974	0.0268885	11.3118	3.49975	0.00175436
WBGene00018815	F54D12.1	0.291175	0.240704	0.557638	0.363172	0.134366	0	0	0.0447886	8.10858	3.01945	0.0420981
WBGene00018865	F55A12.6	3.2149	3.14425	2.7316	3.03025	1.50445	0.574533	0.946397	1.00846	3.00484	1.58729	0.00283421
WBGene00018928	F56B3.2	7.32257	6.45685	7.1197	6.96637	3.25778	2.72268	3.29642	3.09229	2.25282	1.17173	0.000268119
WBGene00018929	F56B3.3	0.121647	0.268163	0.23297	0.207593	0	0.11025	0	0.0367501	5.64879	2.49794	0.0409901
WBGene00018932	mrpl-2	63.8636	57.4294	61.9355	61.0762	31.6061	27.8793	27.265	28.9168	2.11213	1.0787	0.000162316
WBGene00018997	F57B9.3	1.74797	2.58721	2.63025	2.32181	0.967945	0.995788	1.37786	1.11386	2.08447	1.05968	0.0187696
WBGene00019174	H09G03.1	2.07654	1.78812	1.42918	1.76461	0.958241	0.588122	0.759525	0.768629	2.29579	1.19899	0.00988949
WBGene00019288	K02A2.1	0.49628	0.410256	0.23761	0.381382	0	0.112446	0.103727	0.0720576	5.29274	2.40401	0.0213173
WBGene00019368	txt-4	14.3198	18.5791	19.8345	17.5778	9.11955	7.08771	10.0281	8.74511	2.01001	1.00721	0.00934867
WBGene00019508	K07H8.8	0.39681	0.624815	0.434252	0.485292	0.156953	0	0.284354	0.147103	3.29901	1.72203	0.0355108
WBGene00019563	K09C6.9	2.69006	2.96503	3.09109	2.91539	0.413786	0.406339	0.374831	0.398319	7.31925	2.8717	2.95303e-05
WBGene00019674	K12C11.3	13.7369	10.9928	11.2619	11.9972	6.16534	2.89928	5.66358	4.9094	2.44372	1.28908	0.00611989
WBGene00019739	M02F4.9	0.998842	0.688088	0.956455	0.881128	0.460926	0.113158	0.417533	0.330539	2.66573	1.41453	0.0197655
WBGene00019899	R05G6.5	3.81515	3.38461	4.27698	3.82558	1.88936	1.60236	1.71149	1.7344	2.2057	1.14124	0.00151595
WBGene00019901	R05G6.9	0.272725	0.200402	0.174101	0.215743	0.0839013	0.0823913	0.152005	0.106099	2.0334	1.0239	0.0426393
WBGene00020201	T04A6.2	0.311481	0.343319	0.298263	0.317688	0.0958241	0	0.0868029	0.0608757	5.21863	2.38367	0.00152979
WBGene00020220	clec-140	2.12719	1.25605	1.52769	1.63697	0.911498	0.61968	0.825686	0.785621	2.08367	1.05913	0.0349996
WBGene00020221	T05A7.3	1.00307	2.07301	1.68089	1.58566	0.23144	0.909098	0.209651	0.450063	3.52319	1.81688	0.0428836
WBGene00020428	irld-48	0.294435	0.139085	0.161109	0.198209	0.03882	0	0	0.01294	15.3176	3.93712	0.0210431
WBGene00020487	T13C5.7	0.190294	0.314618	0.273328	0.259413	0	0.172465	0	0.0574885	4.51243	2.17391	0.0413931
WBGene00020797	T25D3.3	0.782305	0.819156	0.524375	0.708612	0.144401	0.248154	0.294315	0.228957	3.09496	1.62992	0.00954134
WBGene00020927	W02B3.7	0.207836	0.17181	0.149262	0.176303	0	0.0470911	0	0.015697	11.2316	3.48949	0.00227819
WBGene00020962	W02H5.8	19.1559	20.4057	18.4602	19.3406	9.94113	9.51262	9.26107	9.57161	2.02062	1.0148	8.48065e-05
WBGene00020973	W03B1.3	5.20706	5.1839	3.8602	4.75039	2.89376	1.87754	2.34047	2.37059	2.00388	1.0028	0.0111416
WBGene00021019	W04B5.2	16.9728	15.7538	18.1344	16.9537	8.98649	8.05563	7.09491	8.04568	2.10718	1.07531	0.000530913
WBGene00021023	W04B5.6	4.16461	1.69117	3.35822	3.07133	0.910329	1.0926	0.458126	0.820352	3.74392	1.90455	0.0402553
WBGene00021028	W04C9.6	3.81677	4.91594	3.40841	4.04704	1.66234	1.82676	1.72096	1.73669	2.33032	1.22053	0.00696683
WBGene00021095	mlt-8	0.547976	0.664387	0.577194	0.596519	0.404591	0.148991	0.274876	0.276152	2.16011	1.1111	0.0171973
WBGene00021099	W08F4.10	1.05681	0.776556	0.562202	0.798523	0.325117	0.425689	0.19634	0.315715	2.52925	1.33871	0.0376992
WBGene00021193	math-44	2.22195	2.02145	2.43161	2.225	0.878863	1.0868	0.973041	0.979568	2.27141	1.18359	0.000720109
WBGene00021274	Y23H5B.3	6.15486	7.41021	6.89106	6.81871	3.40827	2.83202	2.69158	2.97729	2.29024	1.1955	0.000830827
WBGene00021335	spp-23	130.349	157.71	171.014	153.024	62.225	53.7725	56.3669	57.4548	2.66338	1.41326	0.00144688
WBGene00021416	mksr-2	4.59552	4.94172	3.75653	4.43126	2.17238	1.93011	2.15528	2.08592	2.12437	1.08703	0.00287782
WBGene00021707	srbc-38	0.39719	0.58372	0.507114	0.496008	0.183288	0	0.110688	0.097992	5.06172	2.33963	0.00634144
WBGene00021726	bath-10	1.89337	1.72915	1.81302	1.81185	1.09839	0.441253	0.542716	0.694118	2.61029	1.38421	0.00596218
WBGene00021875	Y54G2A.10	40.5955	37.602	39.1655	39.121	16.8712	18.6731	18.1963	17.9135	2.18388	1.12689	3.14622e-05
WBGene00022256	Y73B6BL.37	0.156564	0.172568	0.299841	0.209658	0	0.0472987	0.0872622	0.0448536	4.67427	2.22474	0.0336262
WBGene00022263	Y73C8C.4	1.82352	2.07082	2.59274	2.16236	0.611986	0.400648	0.646767	0.553133	3.90929	1.96691	0.00255124
WBGene00022321	fbxa-25	0.515261	0.567929	0.634365	0.572518	0.067935	0.133425	0.0615394	0.087633	6.53313	2.70777	0.000304311
WBGene00022440	Y110A2AL.3	10.3173	7.10746	7.40963	8.27814	3.57078	4.28575	3.23462	3.69705	2.23912	1.16293	0.0128019
WBGene00022628	ZC513.3	0.222726	0.210422	0.121871	0.185006	0	0.115348	0.0266009	0.0473162	3.90999	1.96716	0.0432908
WBGene00022640	nhr-254	0.727869	0.740557	0.696981	0.721802	0.465069	0.253722	0.140428	0.286406	2.5202	1.33354	0.0105363
WBGene00022656	ZK105.5	3.5937	4.12959	2.56259	3.42863	0.635113	0.485087	0.894944	0.671715	5.10429	2.35171	0.00438866
WBGene00022657	ZK105.6	6.21883	5.79996	6.15124	6.05668	1.95521	1.11485	1.82827	1.63278	3.70943	1.8912	0.000110643
WBGene00022730	ZK402.3	31.3841	32.1212	28.9074	30.8042	8.96536	9.21035	9.99548	9.3904	3.28039	1.71387	3.04771e-05
WBGene00022731	ZK402.5	2.51836	2.14492	3.72684	2.79671	0.915611	0.760805	1.18032	0.952245	2.93696	1.55432	0.0200799
WBGene00022795	ZK686.5	0.187877	0.138054	0.179905	0.168612	0	0.113517	0.0523573	0.0552914	3.04952	1.60858	0.0353456
WBGene00023223	ZK1236.8	13.0097	9.84084	12.7019	11.8508	5.88575	4.62386	6.39797	5.63586	2.10275	1.07228	0.00547125
WBGene00023270	F17E9.14	0.539484	0.475702	0.723226	0.579471	0	0.146682	0.135308	0.0939967	6.1648	2.62405	0.00524668
WBGene00023483	Y75B8A.39	0.265387	0.390019	0.677667	0.444358	0.0816439	0	0.0739576	0.0518672	8.56723	3.09883	0.0346993
WBGene00023486	K08B4.7	8.70017	9.70098	8.9122	9.10445	2.05408	3.39241	3.80597	3.08415	2.95201	1.5617	0.000591737
WBGene00023502	clec-184	6.62869	4.8358	6.39306	5.95252	3.08089	3.28476	2.39215	2.91927	2.03905	1.02789	0.00827136
WBGene00043052	srz-104	1.07488	0.557527	0.726538	0.786313	0.233418	0.343825	0.422886	0.333376	2.35864	1.23795	0.0489415
WBGene00043302	F32D8.11	12.2466	12.297	11.4813	12.0083	4.73411	5.81113	5.73576	5.427	2.2127	1.14581	0.000112315
WBGene00043984	C56E6.7	0.71147	0.855485	0.495475	0.687476	0.358162	0.175858	0.378517	0.304179	2.2601	1.17639	0.0355375
WBGene00044012	srxa-19	0.194676	0.14305	0.124276	0.154001	0.0598901	0	0.0542518	0.0380473	4.04761	2.01707	0.0150935
WBGene00044379	ifas-1	1.33325	0.653123	1.3476	1.11132	0.478521	0.402779	0.185773	0.355691	3.1244	1.64358	0.0369414
WBGene00044381	K10G6.5	2.90105	3.30417	3.79652	3.33391	2.14195	1.40227	0.808458	1.45089	2.29783	1.20028	0.0154334
WBGene00044493	Y54G2A.50	26.8121	26.4585	21.8341	25.0349	5.97486	6.59426	5.41237	5.99383	4.17678	2.06239	0.00031415
WBGene00044564	ZK813.6	0.156564	0.172568	0.299841	0.209658	0.0722483	0	0.0654466	0.0458983	4.56788	2.19152	0.0322553
WBGene00044630	bus-17	5.00954	6.8208	6.01971	5.95002	2.17572	2.40364	2.9974	2.52559	2.35589	1.23628	0.0040776
WBGene00044631	bus-18	0.516492	0.332084	0.700647	0.516407	0.158894	0.234051	0.179919	0.190955	2.70435	1.43528	0.0402043
WBGene00044663	F26G1.10	6.29043	7.35791	5.04006	6.22947	3.90987	3.25776	0.643961	2.60387	2.39239	1.25845	0.0392884
WBGene00044679	K02B12.9	3.25498	2.7723	2.97517	3.00082	1.50204	1.07274	1.23694	1.27057	2.36178	1.23988	0.00076911
WBGene00044684	T08G11.2	0.863062	0.543589	0.708374	0.705008	0.341373	0.111743	0.206157	0.219758	3.20812	1.68173	0.0130081
WBGene00044728	Y53F4B.45	2896.9	2500.01	2748.61	2715.17	1008.04	888.273	877.029	924.449	2.93707	1.55438	0.000130045
WBGene00044896	K12C11.5	1.61404	1.30461	1.33947	1.41937	0.0993086	0	0.179919	0.0930758	15.2497	3.93071	0.000279365
WBGene00045100	K03D3.14	0.223326	0.307692	0.213849	0.248289	0.154584	0.0506007	0.140031	0.115072	2.15768	1.10948	0.0391818
WBGene00045168	srpr-1.2	2.82778	3.78472	3.0946	3.2357	1.30491	0.915303	1.18206	1.13409	2.85312	1.51254	0.00239537
WBGene00045208	F13E9.15	129.677	116.872	99.3113	115.287	56.2262	46.8007	50.2053	51.0774	2.2571	1.17447	0.0022373
WBGene00045238	rpr-1	3.04094	2.06263	3.35988	2.82115	0.431777	1.48402	1.56451	1.1601	2.43181	1.28203	0.0359112
WBGene00045246	C29E4.15	2.59127	3.68535	3.44182	3.23948	0.925758	1.8182	0.978371	1.24077	2.61085	1.38452	0.0104742
WBGene00045416	Y37H2A.14	1.49826	1.28443	0.797046	1.19325	0.537747	0.452631	0.347944	0.446107	2.6748	1.41943	0.0253284
WBGene00045455	F26G1.11	7.32141	7.84562	6.037	7.06801	3.00315	3.5635	3.6839	3.41685	2.06858	1.04864	0.00318693
WBGene00045475	T07A5.7	1.17144	1.18789	0.987125	1.11549	0.259476	0.424677	0.313398	0.332517	3.35468	1.74617	0.000630758
WBGene00049995	21ur-4770	5.63632	12.4249	18.89	12.3171	2.60094	0	0	0.86698	14.2069	3.82852	0.0433114
WBGene00050038	21ur-2571	5.63632	3.10622	8.09571	5.61275	2.60094	0	0	0.86698	6.47391	2.69464	0.0476885
WBGene00050911	Y43F8B.18	0.997039	1.41294	1.84126	1.41708	0.788733	0.645448	0.595399	0.676527	2.09464	1.0667	0.0417103
WBGene00077613	F21H7.16	0.173807	0.383147	0.166432	0.241128	0	0.0787618	0	0.0262539	9.18447	3.1992	0.0470048
WBGene00173920	21ur-8696	28.1816	40.3809	43.1771	37.2465	10.4038	15.3248	16.4925	14.0737	2.64654	1.4041	0.00955431
WBGene00185076	Y7A9A.79	22.0433	22.6459	24.0905	22.9265	11.7753	11.3462	9.26454	10.7954	2.12374	1.08661	0.000249666
WBGene00189949	Y48G1C.13	0.786986	0.693944	0.75359	0.74484	0.290531	0.427953	0.131589	0.283358	2.62862	1.39431	0.00680895
WBGene00189950	C39B5.14	1.15182	1.45091	1.41806	1.34026	0.506207	0.845065	0.504406	0.618559	2.16675	1.11553	0.00811018
WBGene00189964	F35C11.9	2.49185	1.37328	1.19305	1.68606	0.574945	0	0.520817	0.365254	4.61613	2.20668	0.0414063
WBGene00194674	F23D12.11	3.11481	2.91822	2.23697	2.75667	1.72483	0.846896	1.04163	1.20445	2.28872	1.19454	0.0145536
WBGene00194895	ZK105.11	1.96709	0.867265	1.56071	1.46502	0.311224	0.560308	0.281924	0.384485	3.81035	1.92992	0.0315294
WBGene00194928	ZC513.14	4.8202	6.29678	6.75253	5.9565	1.73004	2.6697	1.9403	2.11335	2.81852	1.49494	0.0040734
WBGene00195016	srpr-2.1	3.36483	5.8904	3.98016	4.4118	1.09605	0.717549	1.65477	1.15612	3.81603	1.93207	0.0157168
WBGene00195017	srpr-2.2	4.35448	3.27244	2.27438	3.30043	0.548024	1.61448	0.330954	0.831154	3.97091	1.98947	0.0265217
WBGene00195034	F40G9.20	62.1404	65.2307	56.6699	61.347	24.5789	16.091	17.3172	19.329	3.17383	1.66622	0.000323105
WBGene00195169	Y50D4A.6	1.9364	1.33396	1.04301	1.43779	0.558484	0.32906	0.708269	0.531938	2.70293	1.43452	0.0336756
WBGene00195179	F48C1.11	2.65264	2.82297	3.85391	3.10984	0.75978	0.829007	1.98828	1.19236	2.60815	1.38302	0.024825
WBGene00195254	H16D19.6	3.74978	5.57067	5.62016	4.9802	2.10655	0.886558	1.09042	1.36117	3.65876	1.87135	0.0074185
WBGene00195591	R53.9	1.06954	0.392956	0.68277	0.71509	0	0	0.298058	0.0993527	7.19749	2.84749	0.0486976
WBGene00195670	F52B10.4	0.986356	2.17436	2.8335	1.99807	0	0	0.824627	0.274876	7.26899	2.86176	0.0467757
WBGene00196888	T07D1.9	1.25031	0.918742	1.59634	1.25513	0	0	0.696868	0.232289	5.4033	2.43384	0.0280936
WBGene00197163	B0495.15	7.50186	5.05308	5.58718	6.04737	3.46181	1.51089	2.0906	2.35444	2.5685	1.36093	0.0172389
WBGene00197892	Y39B6A.78	0.810704	0.893571	1.16445	0.956242	0.374108	0.367375	0	0.247161	3.8689	1.95192	0.0122467
WBGene00197902	R53.10	1.67494	1.23077	2.13849	1.6814	0.515281	1.01201	0.93354	0.820278	2.04979	1.03548	0.0472381
WBGene00199370	F25B4.14	3.77753	2.77577	2.41149	2.98827	0.387374	0.380403	0.70181	0.489862	6.10021	2.60886	0.00407486
WBGene00199746	F58G11.11	1.2773	0.938571	1.22309	1.14632	0.392948	0	0	0.130983	8.7517	3.12956	0.00377256
WBGene00200026	R07D5.7	1.6789	2.31315	3.61723	2.53643	1.16212	0.760805	0.70181	0.874913	2.89906	1.53559	0.0476948
WBGene00200323	K02E10.10	0.863962	1.42841	1.24095	1.17777	0	0.783018	0.361151	0.38139	3.08811	1.62672	0.0469619
WBGene00200809	T04C12.28	1.63259	0.899734	2.73579	1.75604	0.376688	0	0	0.125563	13.9854	3.80585	0.0409676
WBGene00201046	Y67D2.8	0.954538	2.10422	1.82806	1.62894	0.880964	0	0	0.293655	5.54713	2.47174	0.0423934
WBGene00202513	ZK938.10	0.622962	1.09862	0.954441	0.892008	0.459956	0.112919	0.416654	0.329843	2.70434	1.43528	0.0343488
WBGene00202514	T09F5.20	0.461154	0.508291	0.735973	0.568473	0	0.139316	0.128513	0.0892765	6.36755	2.67074	0.00751413
WBGene00206415	F59H6.14	0.973378	0.751011	0.932071	0.885487	0.269505	0.176437	0.325511	0.257151	3.44345	1.78386	0.0014849
WBGene00206417	W04H10.6	11.7726	15.0802	11.8824	12.9118	5.57944	5.76739	4.78816	5.37833	2.4007	1.26345	0.00259086
WBGene00219217	C08F8.15	0.397858	0.493341	0.619083	0.503428	0.229495	0.180292	0.0415778	0.150455	3.34604	1.74245	0.0143765
WBGene00219236	K03B4.9	2.24958	2.79742	2.81693	2.62131	1.27765	1.20238	1.0127	1.16425	2.25151	1.17089	0.00195738
WBGene00219302	Y43F8B.28	1.9194	2.11559	1.12319	1.71939	0.196828	0.483214	0.445745	0.375262	4.58184	2.19593	0.013186
WBGene00219415	linc-38	0.845448	0.931867	0.607178	0.794831	0.390141	0	0	0.130047	6.11188	2.61162	0.0148984
WBGene00219455	Y43F8B.29	35.9412	31.275	27.6881	31.6347	9.97621	11.5111	10.1666	10.5513	2.99818	1.58409	0.000982851
WBGene00219687	linc-12	3.64193	4.34871	6.68415	4.8916	0	0.825181	0.507463	0.444215	11.0118	3.46098	0.00944079
WBGene00219728	linc-16	4.68866	5.85698	5.98626	5.51064	2.01939	0.566585	0.696868	1.09428	5.03585	2.33223	0.00206608
WBGene00219950	F46A8.13	1937.47	1716.68	1721.18	1791.78	620.134	615.187	555.417	596.913	3.00174	1.5858	9.4465e-05
WBGene00235113	ZK105.12	1.22529	0.945372	1.40795	1.19287	0.169627	0.222098	0.307315	0.233013	5.11932	2.35595	0.00239281
WBGene00235158	Y37E3.30	12.3918	13.2659	13.5708	13.0762	2.16901	1.74271	1.96482	1.95885	6.67544	2.73886	7.64032e-06
WBGene00235300	T06A10.107	0.597792	0.82362	0.71553	0.712314	0.275857	0.270893	0.124944	0.223898	3.18142	1.66967	0.00396461
WBGene00255594	Y48G1BL.8	0.624276	0.55047	1.07601	0.750253	0.230463	0.339473	0.104383	0.224773	3.33782	1.73891	0.0417126
WBGene00269383	ZK384.7	20.2639	21.2998	20.946	20.8366	6.19271	5.47314	6.73165	6.1325	3.39773	1.76457	6.47088e-06
WBGene00269430	F47D2.12	0.335781	0.185052	0.160766	0.227199	0.0774748	0	0	0.0258249	8.79768	3.13712	0.0291872
WBGene00271791	W03D2.15	0.568271	0.268439	0.388683	0.408464	0.0749242	0	0.0678706	0.0475983	8.5815	3.10123	0.0161992
WBGene00271815	spp-27	0.44386	0.48923	0.425025	0.452705	0.136549	0	0	0.0455164	9.94597	3.31411	0.00117637
WBGene00271827	T19H12.15	143.925	122.777	119.126	128.609	50.9022	44.7909	38.8568	44.85	2.86755	1.51982	0.000588521
WBGene00302974	Y65B4BM.3	18.5359	20.9558	19.4831	19.6583	8.66352	8.33486	10.9552	9.31786	2.10974	1.07707	c

## Sheet: Figure 5C
		FPKM of str-130				t` test	P value	P value summary	Significantly different (P < 0.05)
				average		WT-OP50 vs WT-SS	0.1365	ns	no
	WT-OP50	Rpt1	0.48284	0.601443		WT-SS vs nsy-1(ag3)-SS	0.0091	**	yes
		Rpt2	0.330468
		Rpt3	0.99102
	WT-SS	Rpt1	0.184526	0.182312
		Rpt2	0.362411
		Rpt3	0
	nsy-1(ag3)-SS	Rpt1	1.79943	1.7173
		Rpt2	2.20374
		Rpt3	1.14871

## Sheet: Figure 5D
Original worm length	Control RNAi	ins-23 RNAi		Relative worm length	Control RNAi	ins-23 RNAi
	n=42	n=79			n=42	n=79		t` test	P value	P value summary	Significantly different (P < 0.05)
	76.75	83.899			0.370579	0.405097		ins-23 RNAi vs Control RNAi	<0.0001	****	yes
	140.563	86.137			0.678692	0.415903
	143.201	87.879			0.69143	0.424314
	145.871	87.956			0.704322	0.424686
	152.748	89.666			0.737526	0.432942
	154.5	90.791			0.745986	0.438374
	167.622	93.286			0.809344	0.450421
	173.326	100.191			0.836885	0.483761
	174.902	101.06			0.844494	0.487957
	178.097	105.083			0.859921	0.507381
	178.406	105.379			0.861413	0.508811
	181.624	107.708			0.876951	0.520056
	184.105	108.168			0.88893	0.522277
	184.423	111.126			0.890466	0.536559
	185.454	112.169			0.895444	0.541595
	186.679	114.03			0.901358	0.550581
	191.658	117.789			0.925399	0.568731
	192.953	119.495			0.931652	0.576968
	195.455	119.961			0.943732	0.579218
	201.112	123.582			0.971046	0.596702
	206.153	123.854			0.995386	0.598015
	211.616	126.354			1.02176	0.610086
	217.314	126.68			1.04928	0.61166
	218.596	127.188			1.05547	0.614113
	219.673	127.261			1.06067	0.614465
	220.465	129.789			1.06449	0.626671
	225.509	132.454			1.08884	0.639539
	226.671	134.326			1.09446	0.648578
	227.826	134.831			1.10003	0.651016
	231.777	135.928			1.11911	0.656313
	235.885	136.899			1.13894	0.661001
	238.413	136.902			1.15115	0.661016
	248.052	138.949			1.19769	0.670899
	252.307	140.341			1.21824	0.677621
	252.329	140.401			1.21834	0.67791
	253.951	140.428			1.22617	0.678041
	257.195	140.874			1.24184	0.680194
	264.896	140.944			1.27902	0.680532
	269.142	140.957			1.29952	0.680595
	271.568	143.489			1.31124	0.69282
	271.988	144.361			1.31326	0.697031
	287.783	145.072			1.38953	0.700464
		146.038				0.705128
		146.124				0.705543
		146.916				0.709367
		149.854				0.723553
		150.177				0.725113
		153.514				0.741225
		153.987				0.743509
		154.35				0.745261
		154.521				0.746087
		157.674				0.761311
		164.961				0.796495
		165.273				0.798002
		166.978				0.806234
		168.416				0.813178
		170.647				0.82395
		174.507				0.842587
		174.721				0.843621
		175.161				0.845745
		175.424				0.847015
		177.039				0.854813
		178.671				0.862693
		180.784				0.872895
		180.868				0.873301
		181.159				0.874706
		183.256				0.884831
		183.425				0.885647
		185.67				0.896487
		187.364				0.904666
		190.744				0.920986
		190.769				0.921106
		195.941				0.946079
		202.908				0.979718
		204.492				0.987366
		228.096				1.10134
		230.425				1.11258
		240.73				1.16234
		242.647				1.17159
	average:
	207.109	147.695

## Sheet: Figure 5E
Original worm length	nsy-1(ag3)	daf-2(e1370)	nsy-1(ag3);daf-2(e1370)		Relative worm length	nsy-1(ag3)	daf-2(e1370)	nsy-1(ag3);daf-2(e1370)
	n=58	n=57	n=59			n=58	n=57	n=59		t` test	P value	P value summary	Significantly different (P < 0.05)
	2.3	1.24	1.841			1.14266	0.616044	0.914626		daf-2(e1370) vs nsy-1(ag3)	<0.0001	****	Yes
	3.498	1.263	0.893			1.73784	0.62747	0.443651		nsy-1(ag3);daf-2(e1370) vs nsy-1(ag3)	<0.0001	****	Yes
	2.144	1.217	1.665			1.06516	0.604617	0.827187
	2.014	1.384	1.89			1.00057	0.687584	0.93897
	1.815	1.335	1.894			0.901709	0.66324	0.940957
	1.702	1.249	0.968			0.845569	0.620515	0.480911
	3.482	1.398	1.187			1.72989	0.694539	0.589713
	1.563	1.104	1.359			0.776513	0.548477	0.675164
	2.014	1.426	1.341			1.00057	0.70845	0.666221
	2.083	1.317	1.012			1.03485	0.654298	0.502771
	1.088	1.323	1.139			0.540529	0.657279	0.565866
	1.21	1.224	1.191			0.601139	0.608095	0.5917
	2.212	1.438	1.542			1.09894	0.714412	0.76608
	3.118	1.452	1.217			1.54905	0.721367	0.604617
	2.397	1.397	1.187			1.19085	0.694043	0.589713
	2.36	1.267	1.159			1.17247	0.629457	0.575802
	1.413	1.305	1.176			0.701992	0.648336	0.584248
	1.697	1.384	1.275			0.843085	0.687584	0.633432
	2.048	1.181	1.268			1.01747	0.586732	0.629954
	2.018	1.082	1.099			1.00256	0.537548	0.545993
	1.185	1.374	1.211			0.588719	0.682616	0.601636
	3.496	1.271	1.519			1.73685	0.631445	0.754653
	1.337	1.307	1.249			0.664234	0.64933	0.620515
	2.486	1.414	1.297			1.23507	0.702488	0.644362
	1.605	1.496	1.225			0.797379	0.743227	0.608591
	2.082	1.518	1.276			1.03436	0.754156	0.633929
	1.919	1.367	1.253			0.953377	0.679138	0.622502
	1.793	1.355	1.267			0.890779	0.673177	0.629457
	1.972	1.304	1.588			0.979708	0.647839	0.788933
	2.641	1.149	1.066			1.31207	0.570834	0.529599
	1.407	1.536	1.338			0.699011	0.763099	0.664731
	1.396	1.373	1.646			0.693546	0.682119	0.817748
	2.235	1.338	1.55			1.11037	0.664731	0.770054
	2.779	1.307	1.121			1.38063	0.64933	0.556923
	1.991	1.413	1.278			0.989147	0.701992	0.634922
	1.869	1.25	1.308			0.928537	0.621012	0.649827
	1.48	1.336	1.089			0.735278	0.663737	0.541025
	1.47	1.326	1.356			0.73031	0.658769	0.673673
	2.118	1.198	1.779			1.05224	0.595178	0.883824
	1.95	1.271	1.146			0.968778	0.631445	0.569343
	1.601	1.408	1.144			0.795392	0.699507	0.56835
	1.828	1.39	0.891			0.908167	0.690565	0.442657
	1.724	1.378	1.213			0.856499	0.684603	0.60263
	1.891	1.311	1.124			0.939466	0.651317	0.558414
	1.819	1.193	1.052			0.903696	0.592693	0.522643
	1.759	1.474	1.54			0.873888	0.732297	0.765086
	1.541	1.35	1.806			0.765583	0.670693	0.897238
	2.305	1.358	1.771			1.14515	0.674667	0.879849
	2.561	1.356	1.074			1.27233	0.673673	0.533573
	2.933	1.384	1.114			1.45714	0.687584	0.553446
	1.873	1.351	1.157			0.930524	0.671189	0.574808
	1.817	1.413	1.316			0.902702	0.701992	0.653801
	1.805	1.414	1.542			0.896741	0.702488	0.76608
	1.556	1.384	1.262			0.773035	0.687584	0.626973
	2.186	1.244	1.538			1.08603	0.618031	0.764093
	2.023	1.221	1.05			1.00505	0.606604	0.52165
	2.983	1.317	0.939			1.48198	0.654298	0.466504
	1.153		1.35			0.572821		0.670693
			1.039					0.516185
	average:
	2.01284	1.33044	1.30147
