# Supplementary material for: Neuronal detection triggers systemic digestive shutdown in response to adverse food sources in Caenorhabditis elegans
Source: eLife. 2025 Oct 3;14:RP104028. doi: 10.7554/eLife.104028 (PMC12494379; doi:10.7554/eLife.104028)
Supplement: Figure 6—figure supplement 1—source data 1. [file elife-104028-fig6-figsupp1-data1.xlsx]

## Sheet: Figure 6—figure supplement 1A
Original worm length	Control RNAi	AWC ins-23 RNAi		Relative worm length	Control RNAi	AWC ins-23 RNAi
	n=21	n=29			n=21	n=29		t` test	P value	P value summary	Significantly different (P < 0.05)
	20.499	18.901			0.959875	0.885048		AWC ins-23 RNAi vs Control RNAi	<0.0001	****	yes
	21.725	23.15			1.01728	1.08401
	21.241	21.353			0.99462	0.999864
	20.096	16.529			0.941004	0.773978
	23.375	16.828			1.09455	0.787979
	21.178	17.059			0.99167	0.798795
	18.757	15.898			0.878305	0.744431
	18.621	19.866			0.871937	0.930235
	20.478	18.572			0.958892	0.869642
	21.959	17.332			1.02824	0.811579
	22.516	17.422			1.05432	0.815793
	22.472	19.653			1.05226	0.920261
	23.046	19.146			1.07914	0.89652
	21.165	20.917			0.991061	0.979448
	23.55	19.088			1.10274	0.893804
	20.863	20.292			0.97692	0.950182
	18.882	20.145			0.884158	0.943299
	23.004	19.373			1.07717	0.90715
	22.373	21.672			1.04763	1.0148
	21.826	20.486			1.02201	0.959266
	20.848	19.715			0.976217	0.923164
		17.554				0.821974
		18.365				0.85995
		18.661				0.87381
		21.23				0.994104
		18.654				0.873482
		18.735				0.877275
		18.343				0.858919
		20.041				0.938429
	average:
	21.3559	19.1372

## Sheet: Figure 6—figure supplement 1B
Original worm length	Control RNAi	AWC str-130 RNAi		Relative worm length	Control RNAi	AWC str-130 RNAi
	n=22	n=28			n=22	n=28		t` test	P value	P value summary	Significantly different (P < 0.05)
	22.424	24.425			1.07426	1.17012		AWC str-130 RNAi vs Control RNAi	0.009	**	yes
	20.036	26.248			0.959859	1.25745
	18.553	21.333			0.888813	1.02199
	22.762	23.996			1.09045	1.14957
	23.496	23.257			1.12562	1.11417
	20.984	23.963			1.00527	1.14799
	21.323	18.806			1.02151	0.900933
	22.234	18.484			1.06516	0.885507
	18.069	22.43			0.865626	1.07455
	19.568	24.608			0.937438	1.17889
	19.301	25.321			0.924647	1.21305
	19.069	22.151			0.913533	1.06118
	19.665	22.319			0.942085	1.06923
	18.083	22.106			0.866297	1.05903
	21.72	23.424			1.04053	1.12217
	21.786	21.526			1.0437	1.03124
	21.608	22.139			1.03517	1.06061
	21.915	23.917			1.04988	1.14578
	19.66	22.502			0.941846	1.078
	22.504	22.987			1.07809	1.10123
	22.112	17.325			1.05931	0.829983
	22.354	25.309			1.07091	1.21247
		23.339				1.11809
		22.119				1.05965
		19.052				0.912718
		24.306				1.16442
		23.246				1.11364
		18.008				0.862704
	average:
	20.8739	22.4516
