# Supplementary material for: Neuronal detection triggers systemic digestive shutdown in response to adverse food sources in Caenorhabditis elegans
Source: eLife. 2025 Oct 3;14:RP104028. doi: 10.7554/eLife.104028 (PMC12494379; doi:10.7554/eLife.104028)
Supplement: Figure 6—source data 1. [file elife-104028-fig6-data1.xlsx]

## Sheet: Figure 6A
Original fluorenscence	WT OP50	WT SS	nsy-1 OP50	nsy-1 SS		normalize	WT OP50	WT SS	nsy-1(ag3) OP50	nsy-1(ag3) SS
	n=22	n=21	n=18	n=20			n=22	n=21	n=18	n=20		t` test	P value	P value summary	Significantly different (P < 0.05)
	44.134	30.62	201.811	49.872			0.821248	0.569779	3.75531	0.928021		nsy-1(ag3) OP50 vs WT OP50	<0.0001	****	yes
	65.501	33.805	206.581	66.552			1.21885	0.629046	3.84407	1.2384		nsy-1(ag3) SS vs WT SS	<0.0001	****	yes
	48.021	14.859	176.977	74.981			0.893578	0.276497	3.2932	1.39525
	73.796	16.243	159.571	85.148			1.3732	0.302251	2.96931	1.58444
	48.947	18.805	124.039	85.74			0.910809	0.349925	2.30813	1.59546
	40.724	23.186	157.94	87.85			0.757795	0.431447	2.93896	1.63472
	45.735	32.16	157.115	88.86			0.85104	0.598435	2.92361	1.65351
	80.52	19.39	141.297	90.773			1.49832	0.36081	2.62926	1.68911
	74.06	24.235	187.56	94.3			1.37811	0.450966	3.49013	1.75474
	31.513	20.692	189.562	96.957			0.586396	0.385038	3.52738	1.80418
	38.867	24.355	129.957	104.595			0.72324	0.453199	2.41825	1.94631
	41.901	9.674	159.624	105.205			0.779697	0.180014	2.97029	1.95766
	42.45	12.83	197.345	109.829			0.789912	0.238741	3.67221	2.04371
	67.624	19.263	206.821	110.668			1.25835	0.358447	3.84854	2.05932
	25.662	23.023	178.376	112.16			0.47752	0.428414	3.31923	2.08708
	47.479	20.804	179.342	129.287			0.883492	0.387122	3.33721	2.40578
	37.727	25.254	183.106	131.913			0.702027	0.469928	3.40725	2.45465
	38.578	27.969	167.066	134.964			0.717862	0.520449	3.10878	2.51142
	44.418	19.16		140.456			0.826533	0.356531		2.61361
	89.715	21.373		162.075			1.66942	0.39771		3.0159
	64.577	12.77					1.20165	0.237625
	90.334						1.68094
	average:
	53.7401	21.451	172.449	103.109

## Sheet: Figure 6B
Original fluorenscence	WT	AWC nsy-1 KO		normalize	WT	AWC nsy-1 KO
	n=53	n=52			n=53	n=52		t` test	P value	P value summary	Significantly different (P < 0.05)
	28.121	68.339			0.754124	1.83265		AWC nsy-1 KO vs WT	<0.0001	****	Yes
	30.893	64.134			0.828461	1.71989
	20.808	56.588			0.55801	1.51753
	26.938	67.566			0.722399	1.81192
	28.138	66.445			0.75458	1.78186
	57.868	55.789			1.55185	1.4961
	54.734	53.954			1.46781	1.44689
	55.304	56.13			1.48309	1.50524
	53.722	62.814			1.44067	1.68449
	47.447	50.093			1.27239	1.34335
	53.944	51.296			1.44662	1.37561
	37.983	59.34			1.01859	1.59133
	40.261	64.935			1.07968	1.74137
	36.344	67.827			0.974641	1.81892
	31.215	53.307			0.837096	1.42954
	39.201	57.051			1.05126	1.52994
	34.563	60.32			0.926879	1.61761
	33.892	55.969			0.908885	1.50093
	36.623	50.864			0.982123	1.36402
	27.683	64.963			0.742378	1.74212
	29.305	50.348			0.785875	1.35019
	35.185	64.639			0.94356	1.73343
	39.888	51.901			1.06968	1.39183
	45.39	45.473			1.21723	1.21945
	41.488	53.405			1.11259	1.43217
	33.584	59.485			0.900625	1.59522
	40.792	44.243			1.09392	1.18647
	46.555	43.268			1.24847	1.16032
	44.399	40.766			1.19065	1.09323
	46.797	52.343			1.25496	1.40369
	36.102	64.748			0.968151	1.73635
	31.376	79.967			0.841413	2.14448
	39.069	77.084			1.04772	2.06717
	33.071	84.627			0.886868	2.26945
	30.846	72.838			0.8272	1.9533
	35.398	74.493			0.949272	1.99769
	23.356	78.085			0.62634	2.09401
	23.397	76.584			0.62744	2.05376
	31.005	77.267			0.831464	2.07208
	27.301	83.516			0.732134	2.23966
	22.922	72.471			0.614702	1.94346
	33.864	73.857			0.908134	1.98063
	36.836	78.287			0.987835	2.09943
	37.943	85.624			1.01752	2.29619
	38.714	66.197			1.0382	1.77521
	32.737	65.912			0.877911	1.76757
	37.635	66.952			1.00926	1.79546
	32.883	59.375			0.881827	1.59227
	49.035	65.093			1.31498	1.74561
	42.19	75.881			1.13141	2.03491
	46.936	79.05			1.25869	2.11989
	41.623	60.987			1.11621	1.63549
	33.047				0.886225
	average:
	37.2896	63.7017

## Sheet: Figure 6C
Original fluorenscence	WT	nsy-1(ag3)	bcf-1(ok2599)	nsy-1(ag3);bcf-1(ok2599)		normalize	WT	nsy-1(ag3)	bcf-1(ok2599)	nsy-1(ag3);bcf-1(ok2599)
	n=94	n=83	n=79	n=59			n=94	n=83	n=79	n=59		t` test	P value	P value summary	Significantly different (P < 0.05)
	52.694	62.66	43.086	51.253			0.661081	0.786111	0.540542	0.643003		nsy-1(ag3) vs WT	<0.0001	****	yes
	55.063	70.392	49.035	55.572			0.690802	0.883114	0.615176	0.697187		bcf-1(ok2599) vs nsy-1(ag3)	<0.0001	****	yes
	58.216	74.204	56.475	58.956			0.730358	0.930938	0.708516	0.739642		nsy-1(ag3);bcf-1(ok2599) vs nsy-1(ag3)	<0.0001	****	yes
	59.05	75.149	58.185	59.552			0.740821	0.942794	0.729969	0.747119
	59.955	75.343	60.12	60.775			0.752175	0.945228	0.754245	0.762462
	61.198	76.033	60.797	62.153			0.767769	0.953884	0.762738	0.77975
	61.665	80.023	61.358	64.971			0.773628	1.00394	0.769777	0.815104
	62.547	80.45	62.331	68.823			0.784693	1.0093	0.781984	0.86343
	62.618	86.779	62.333	69.647			0.785584	1.0887	0.782009	0.873768
	62.918	87.359	62.457	70.401			0.789348	1.09598	0.783564	0.883227
	63.191	87.718	62.969	71.265			0.792773	1.10048	0.789988	0.894066
	63.248	89.572	63.483	72.111			0.793488	1.12374	0.796436	0.90468
	65.31	89.638	63.671	73.361			0.819357	1.12457	0.798795	0.920362
	65.358	90.173	64.688	73.612			0.819959	1.13128	0.811554	0.923511
	66.617	90.757	64.789	74.143			0.835754	1.13861	0.812821	0.930173
	67.438	92.267	66.189	74.487			0.846054	1.15755	0.830385	0.934489
	68.375	95.369	66.664	74.723			0.857809	1.19647	0.836344	0.937449
	68.442	95.986	67.729	74.77			0.85865	1.20421	0.849705	0.938039
	69.345	98.976	67.964	75.205			0.869979	1.24172	0.852653	0.943496
	69.623	100.11	68.513	75.406			0.873466	1.25595	0.859541	0.946018
	69.757	103.113	69.263	76.291			0.875148	1.29362	0.86895	0.957121
	69.827	103.728	69.27	77.03			0.876026	1.30134	0.869038	0.966392
	70.327	103.979	70.53	77.374			0.882299	1.30449	0.884845	0.970708
	70.899	104.457	71.852	77.512			0.889475	1.31048	0.901431	0.972439
	70.931	106.036	72.608	77.864			0.889876	1.33029	0.910915	0.976855
	71.392	107.165	73.156	78.883			0.89566	1.34446	0.91779	0.989639
	72.196	107.313	73.994	79.073			0.905746	1.34631	0.928304	0.992023
	73.059	108.27	74.243	79.228			0.916573	1.35832	0.931427	0.993968
	73.597	108.428	75.031	79.237			0.923323	1.3603	0.941313	0.99408
	73.923	109.6	75.142	79.871			0.927413	1.375	0.942706	1.00203
	73.97	111.384	75.16	80.261			0.928002	1.39739	0.942932	1.00693
	73.98	112.445	75.323	80.451			0.928128	1.4107	0.944977	1.00931
	75.559	113.961	75.335	81.278			0.947938	1.42972	0.945127	1.01969
	76.195	116.504	75.35	81.533			0.955917	1.46162	0.945315	1.02289
	76.62	116.571	75.573	81.89			0.961248	1.46246	0.948113	1.02736
	76.819	116.74	75.918	83.922			0.963745	1.46458	0.952441	1.05286
	77.77	117.896	76.271	83.946			0.975676	1.47908	0.95687	1.05316
	77.951	119.048	76.671	84.225			0.977947	1.49354	0.961888	1.05666
	78.211	119.648	76.74	84.374			0.981209	1.50106	0.962754	1.05853
	78.234	121.258	77.24	84.665			0.981497	1.52126	0.969027	1.06218
	78.547	121.78	77.319	84.805			0.985424	1.52781	0.970018	1.06393
	79.059	122.777	77.888	84.88			0.991847	1.54032	0.977156	1.06488
	79.173	123.332	77.892	86.247			0.993278	1.54728	0.977207	1.08203
	79.217	124.384	78.227	86.254			0.99383	1.56048	0.981409	1.08211
	79.327	124.766	78.594	86.761			0.99521	1.56527	0.986014	1.08847
	79.55	125.218	79.006	87.788			0.998007	1.57094	0.991182	1.10136
	79.788	127.46	81.198	88.729			1.00099	1.59907	1.01868	1.11316
	79.82	129.663	81.686	88.956			1.00139	1.62671	1.0248	1.11601
	79.854	131.344	82.432	89.212			1.00182	1.6478	1.03416	1.11922
	80.339	134.155	82.562	92.782			1.00791	1.68306	1.03579	1.16401
	80.45	135.382	82.809	93.463			1.0093	1.69846	1.03889	1.17256
	80.549	136.549	82.858	94.048			1.01054	1.7131	1.03951	1.17989
	81.281	137.576	82.902	95.506			1.01972	1.72598	1.04006	1.19819
	81.444	138.016	83.046	96.345			1.02177	1.7315	1.04187	1.20871
	81.527	138.529	83.066	97.397			1.02281	1.73794	1.04212	1.22191
	81.699	139.347	83.119	104.12			1.02497	1.7482	1.04278	1.30625
	81.895	139.467	83.214	104.735			1.02743	1.74971	1.04397	1.31397
	82.217	140.285	83.933	113.497			1.03147	1.75997	1.05299	1.42389
	82.263	143.453	84.21	117.776			1.03204	1.79971	1.05647	1.47758
	82.51	149.68	84.443				1.03514	1.87783	1.05939
	83.4	151.869	84.508				1.04631	1.9053	1.06021
	83.45	156.967	84.842				1.04694	1.96925	1.0644
	83.952	157.011	85.664				1.05323	1.96981	1.07471
	84.397	157.448	86.4				1.05882	1.97529	1.08395
	85.12	166.657	86.469				1.06789	2.09082	1.08481
	85.142	169.544	87.748				1.06816	2.12704	1.10086
	85.34	172.071	88.004				1.07065	2.15874	1.10407
	85.526	181.245	89.204				1.07298	2.27384	1.11912
	86.374	183.867	90.09				1.08362	2.30673	1.13024
	86.449	186.901	90.785				1.08456	2.3448	1.13896
	87.031	188.502	91.569				1.09186	2.36488	1.14879
	87.189	188.6	91.604				1.09384	2.36611	1.14923
	87.194	195.162	91.847				1.09391	2.44844	1.15228
	87.638	196.346	93.77				1.09948	2.46329	1.17641
	87.773	197.321	93.873				1.10117	2.47552	1.1777
	88.153	201.179	94.49				1.10594	2.52392	1.18544
	90.973	204.402	94.502				1.14132	2.56436	1.18559
	91.094	205.683	96.887				1.14283	2.58043	1.21551
	92.678	206.222	103.302				1.16271	2.58719	1.29599
	92.789	216.776					1.1641	2.7196
	93.208	224.26					1.16936	2.81349
	94.492	232.243					1.18546	2.91364
	94.841	251.646					1.18984	3.15707
	95.612						1.19952
	95.888						1.20298
	97.808						1.22707
	98.248						1.23259
	98.9						1.24077
	99.766						1.25163
	100.436						1.26004
	104.9						1.31604
	105.884						1.32838
	106.602						1.33739
	109.787						1.37735
	average:
	79.7088	132.308	76.8793	80.7355

## Sheet: Figure 6D
Original fluorenscence	Control RNAi	ins-23 RNAi		normalize	Control RNAi	ins-23 RNAi
	n=48	n=44			n=48	n=44		t` test	P value	P value summary	Significantly different (P < 0.05)
	81.826	42.871			0.78673	0.412191		Control RNAi vs ins-23 RNAi	<0.0001	****	yes
	84.549	49.967			0.812911	0.480416
	84.783	50.856			0.815161	0.488964
	84.938	62.15			0.816651	0.597552
	88.516	62.205			0.851052	0.598081
	88.892	62.403			0.854667	0.599984
	94.087	69.368			0.904616	0.666951
	95.588	69.908			0.919047	0.672142
	96.095	70.417			0.923922	0.677036
	97.265	72.687			0.935171	0.698862
	99.263	73.069			0.954381	0.702534
	99.284	77.898			0.954583	0.748964
	99.376	80.458			0.955468	0.773577
	99.401	82.952			0.955708	0.797556
	100.004	84.459			0.961506	0.812046
	100.122	85.682			0.96264	0.823804
	100.778	87.471			0.968947	0.841005
	101.069	87.556			0.971745	0.841822
	102.151	88.439			0.982148	0.850312
	102.284	88.819			0.983427	0.853966
	102.574	89.048			0.986215	0.856167
	103.8	89.952			0.998003	0.864859
	104.257	89.959			1.0024	0.864926
	104.747	90.304			1.00711	0.868243
	105.356	92.841			1.01296	0.892636
	105.621	94.221			1.01551	0.905904
	106.411	94.446			1.02311	0.908067
	106.716	94.561			1.02604	0.909173
	108.271	94.799			1.04099	0.911461
	108.34	95.058			1.04165	0.913951
	108.432	95.43			1.04254	0.917528
	108.882	99.416			1.04686	0.955852
	109.216	99.715			1.05008	0.958727
	109.588	101.114			1.05365	0.972178
	109.637	105.824			1.05412	1.01746
	110.297	106.074			1.06047	1.01987
	110.657	107.104			1.06393	1.02977
	111.292	109.62			1.07004	1.05396
	111.758	109.779			1.07452	1.05549
	112.924	110.269			1.08573	1.0602
	113.456	111.144			1.09084	1.06861
	114.953	118.066			1.10524	1.13517
	115.438	121.843			1.1099	1.17148
	116.313	123.827			1.11831	1.19056
	116.436				1.11949
	116.808				1.12307
	118.932				1.14349
	120.987				1.16325
	average:
	104.008	88.5011
